# Supplementary material for: Storminess in North West Europe and volcanic activity during the Holocene
Source: Copernicus journal article supplement (doi:10.5194/egusphere-2025-3737), 2025-09-08
Supplement: Supplementary file 1 [file egusphere-2025-3737-supplement.zip]

## Sheet: XRF elements
Element depth (mm)	Element Age (cal ka BP)	Br_clr	Ca_clr	Si_clr		Al (kcps)	Si (kcps)	S (kcps)	Ar (kcps)	Ca (kcps)	Br (kcps)	Cr (kcps)	Fe (kcps)	Ni (kcps)	Cu (kcps)	Zr (kcps)	Ba (kcps)
13.2	0.0186	1.61822	-0.0320839	-1.93099		45	28	62	410	187	974	509	782	145	846	178	53
13.25	0.019	2.31156	0.509666	-2.38071		34	10	45	361	180	1091	432	666	8	549	69	27
13.3	0.0194	1.88135	0.273979	-2.59598		13	11	51	318	194	968	485	705	124	584	328	30
13.35	0.0198	2.31978	0.00400212	-2.6508		14	9	56	364	128	1297	374	622	117	557	92	31
13.4	0.0202	2.0683	-0.0376774	-1.88934		44	27	39	388	172	1413	451	761	72	780	272	46
13.45	0.0206	1.74884	-0.263765	-2.46791		50	16	67	372	145	1085	453	785	242	709	289	37
13.5	0.021	2.21556	0.0607089	-1.86639		7	23	57	365	158	1363	491	775	100	660	124	52
13.55	0.0214	1.93293	0.122824	-1.29028		34	46	70	363	189	1155	428	573	83	658	117	35
13.6	0.0218	1.98849	-0.228737	-1.45391		34	42	50	307	143	1313	481	698	187	578	401	19
13.65	0.0222	1.93572	-0.276795	-1.58586		39	37	56	275	137	1252	475	826	295	639	179	24
13.7	0.0226	1.95321	-0.39895	-1.94487		48	26	54	257	122	1282	458	797	166	895	222	40
13.75	0.023	1.88352	-0.112737	-1.56116		23	39	53	269	166	1222	467	806	238	864	241	35
13.8	0.0234	2.18682	0.0675904	-2.20454		24	20	47	244	194	1615	468	753	170	774	329	48
13.85	0.0238	1.94175	-0.382344	-1.67956		32	44	65	296	161	1645	530	921	213	967	689	60
13.9	0.0242	2.16424	-0.0641434	-1.95121		16	25	48	308	165	1532	553	876	64	824	299	77
13.95	0.0246	1.77897	0.0450649	-1.92902		32	35	80	316	252	1427	601	1071	211	1107	297	84
14	0.025	1.75061	-0.117058	-1.7265		16	41	79	335	205	1327	593	1046	274	988	311	91
14.05	0.02535	2.03019	-0.171655	-2.2511		28	21	50	283	168	1519	553	913	202	810	314	72
14.1	0.0257	1.81648	-0.046656	-1.84331		15	34	59	291	205	1321	604	861	261	988	532	57
14.15	0.02605	1.65768	0.331391	-2.46661		36	17	48	334	279	1051	624	946	173	818	259	67
14.2	0.0264	1.67569	0.141977	-2.35048		15	22	92	367	266	1233	591	1207	212	1235	286	117
14.25	0.02675	2.07515	0.308131	-2.50278		6	16	57	375	266	1557	550	1072	205	1325	313	73
14.3	0.0271	1.65198	0.0295516	-2.31225		26	25	62	341	260	1317	588	1058	285	1305	580	106
14.35	0.02745	1.72696	0.105447	-2.83899		24	13	83	398	247	1250	695	1307	285	1022	160	108
14.4	0.0278	1.68748	0.0229589	-2.24096		31	29	65	453	279	1474	719	1461	232	1117	471	121
14.45	0.02885	1.778	0.340668	-1.7121		10	38	34	386	296	1246	663	1024	182	1280	378	69
14.5	0.0292	1.81346	0.0708737	-1.89416		28	37	64	326	264	1508	652	1278	158	1243	319	109
14.55	0.02955	1.50111	0.0677918	-1.97528		37	35	65	387	270	1132	667	1077	191	1222	511	78
14.6	0.0299	1.60552	0.0681097	-2.6555		38	17	72	368	259	1205	725	1070	257	1124	343	98
14.65	0.03025	1.64495	-0.21086	-2.07752		26	30	70	385	194	1241	566	975	193	1217	406	134
14.7	0.0306	1.59052	0.244734	-2.67304		11	16	67	368	296	1137	687	1165	267	1215	403	157
14.75	0.03095	1.7852	0.207286	-3.16001		38	10	50	357	290	1405	677	1438	214	1042	430	114
14.8	0.0313	1.85876	0.0800475	-2.95343		43	13	68	386	270	1599	623	1209	257	1066	453	97
14.85	0.03165	1.70957	0.383246	-2.86594		8	13	56	358	335	1262	670	1650	388	1230	455	95
14.9	0.032	1.63461	0.1087	-2.1193		35	32	96	400	297	1366	682	1089	182	1204	437	103
14.95	0.03235	1.63951	0.375816	-2.73918		20	15	84	367	338	1196	727	1099	185	1037	440	97
15	0.0327	1.79076	0.255753	-3.14241		26	11	75	401	329	1527	680	1160	296	1136	633	103
15.05	0.03305	1.78534	0.325042	-2.81045		37	15	70	392	345	1486	648	1067	103	1423	655	111
15.1	0.0334	1.64	0.237339	-3.0785		28	11	38	376	303	1232	730	1256	279	1351	497	123
15.15	0.03375	1.76671	0.268726	-3.27384		13	9	83	372	311	1391	748	1195	305	1140	504	133
15.2	0.0341	1.71524	0.429584	-2.40896		27	22	84	412	376	1360	690	1250	196	1200	277	78
15.25	0.03445	1.92313	0.466693	-2.66257		9	14	38	397	320	1373	762	1344	333	1072	141	99
15.3	0.0348	1.83241	0.208783	-1.87066		18	35	88	473	280	1420	620	1381	83	830	367	84
15.35	0.03515	1.89304	-0.267931	-1.57461		47	49	72	467	181	1571	453	994	198	809	277	70
15.4	0.0355	1.8167	0.0100489	-2.72332		26	13	91	473	200	1218	590	1201	82	1199	173	85
15.45	0.03585	1.76134	0.0232716	-2.05249		27	34	67	414	271	1541	659	1236	234	1046	397	141
15.5	0.0362	1.34687	0.000804808	-1.84622		33	44	94	453	279	1072	671	1275	231	1246	448	108
15.55	0.03655	1.81973	0.128932	-2.57541		29	18	65	407	269	1459	670	1204	160	1010	424	102
15.6	0.0369	2.02121	0.160546	-3.08594		20	10	47	435	257	1652	644	1329	242	1170	429	67
15.65	0.03725	1.59798	0.0691924	-1.67094		36	53	49	423	302	1393	701	1407	288	1197	616	72
15.7	0.0376	1.82983	0.578026	-2.38904		11	23	87	439	447	1563	684	1619	204	1084	337	111
15.75	0.03795	2.03406	0.41924	-2.81944		14	16	81	410	408	2051	726	1873	269	1104	457	121
15.8	0.0383	1.87139	0.256235	-2.72057		31	16	78	384	314	1579	687	1527	126	1055	566	73
15.85	0.03865	1.9593	-0.176796	-2.01783		39	33	99	380	208	1761	640	1236	178	1075	208	98
15.9	0.039	1.91295	0.18345	-3.25697		36	10	81	400	312	1759	663	1918	318	1035	502	70
15.95	0.0394	1.78066	0.047668	-1.9915		49	38	99	426	292	1652	681	1481	162	1115	491	64
16	0.0398	1.73749	0.235362	-3.47122		28	7	82	355	285	1280	755	1463	180	1066	411	94
16.05	0.0406	1.93142	0.154426	-2.62798		25	19	54	467	307	1815	672	1756	235	1352	448	98
16.1	0.041	1.96506	0.0847488	-2.35089		35	26	88	433	297	1947	654	1197	215	1020	521	95
16.15	0.0414	2.04013	0.218671	-2.93833		22	12	70	405	282	1743	736	1349	83	1026	536	110
16.2	0.0418	2.00414	0.164317	-2.03942		26	34	97	440	308	1939	642	1270	95	887	771	85
16.25	0.0422	2.03931	0.230102	-2.28635		6	26	94	391	322	1966	654	1482	269	1052	686	115
16.3	0.0426	1.88092	0.193133	-1.88318		9	40	64	436	319	1725	686	1492	188	1321	613	127
16.35	0.043	1.95226	0.0925919	-1.9293		27	38	83	448	287	1843	718	1317	158	828	416	99
16.4	0.0434	1.91621	0.0473058	-2.35814		24	24	48	430	266	1724	556	1545	294	1045	749	66
16.45	0.0438	1.87211	0.217217	-3.09557		41	13	84	428	357	1868	698	1408	195	1247	885	117
16.5	0.0442	1.98685	0.275709	-3.38785		9	8	72	454	312	1727	684	1639	315	1132	495	124
16.55	0.0446	1.65796	-0.0496356	-2.15377		48	35	115	441	287	1583	670	1654	180	924	673	118
16.6	0.045	2.03404	0.150896	-3.11867		12	10	88	397	263	1729	661	1926	156	1022	551	84
16.65	0.0454	1.98656	-0.0348415	-1.98075		34	38	58	425	266	2008	655	1490	179	1160	576	96
16.7	0.0458	1.93907	0.0638566	-2.67188		40	19	61	401	293	1911	691	1503	247	1227	507	112
16.75	0.0462	1.81654	0.0729805	-2.3525		27	26	83	404	294	1681	738	1213	257	1075	525	115
16.8	0.0466	2.09511	0.0566373	-2.01471		8	31	55	427	246	1889	591	1854	157	959	724	77
16.85	0.047	1.90039	0.125273	-2.25363		39	29	62	422	313	1847	741	1662	268	1093	559	57
16.9	0.04735	1.88001	0.121725	-2.32681		43	28	67	454	324	1880	717	1489	260	1132	547	81
16.95	0.0477	1.96905	0.25482	-2.35355		28	26	80	384	353	1960	729	1384	270	913	653	70
17	0.04805	2.08432	0.285639	-2.27338		24	26	76	335	336	2030	752	1433	97	1092	715	76
17.05	0.04875	2.06578	0.3443	-3.31412		30	10	90	366	388	2170	792	2233	245	894	537	108
17.1	0.0491	2.17258	0.17208	-2.539		39	22	72	359	331	2447	721	1414	290	848	686	71
17.15	0.04945	1.93187	0.087123	-2.2541		48	33	81	346	343	2170	737	2140	259	1183	578	101
17.2	0.0498	1.92846	0.185229	-2.93998		45	17	102	367	387	2212	824	1617	395	1325	872	82
17.25	0.05015	1.85618	0.368103	-2.22136		16	31	86	358	413	1829	742	1433	290	1114	750	100
17.3	0.0505	1.81879	0.0746204	-2.27114		36	34	104	389	355	2031	732	1416	413	1288	807	103
17.35	0.05085	1.97168	0.264241	-2.25076		51	30	96	353	371	2046	636	1578	196	1058	553	63
17.4	0.0512	1.81462	0.46223	-2.51152		35	23	115	347	450	1740	713	1482	220	1180	609	64
17.45	0.05155	1.81017	0.304646	-2.47054		32	24	97	366	385	1735	732	1221	276	1079	764	74
17.5	0.0519	1.77127	0.359971	-1.98133		18	38	116	366	395	1620	748	1395	162	1087	839	67
17.55	0.05225	1.99914	0.0126545	-1.94418		54	39	69	374	276	2012	599	1607	152	921	607	68
17.6	0.0526	1.94909	-0.0894953	-1.7025		40	56	79	400	281	2158	820	1892	206	990	574	91
17.65	0.05295	2.03476	0.160329	-2.20992		44	30	94	369	321	2092	809	1315	304	923	529	36
17.7	0.0533	2.07991	0.0998543	-1.8157		29	43	76	310	292	2115	660	1359	274	877	847	35
17.75	0.05365	1.97598	0.0119569	-1.83163		56	47	98	350	297	2117	661	1484	247	1039	595	48
17.8	0.054	1.99901	0.0794597	-1.84678		32	44	79	334	302	2059	715	1258	261	811	615	82
17.85	0.05435	1.90752	0.0428288	-2.21324		43	33	101	350	315	2033	669	1636	422	1352	459	62
17.9	0.0547	2.05124	0.185717	-1.87073		21	44	90	382	344	2222	692	1746	219	1093	401	105
17.95	0.05505	1.81579	0.255319	-2.25453		46	33	101	346	406	1933	715	1631	273	1125	683	92
18	0.0554	2.03519	0.217696	-2.35033		29	25	75	272	326	2007	727	1386	165	1163	974	58
18.05	0.05575	2.15847	0.0303333	-2.43158		30	22	57	333	258	2167	753	1119	186	843	710	92
18.1	0.0561	2.07537	-0.0489377	-2.68378		41	17	61	435	237	1983	668	1081	260	848	355	115
18.15	0.05645	1.98548	-0.0128201	-1.89052		44	39	73	337	255	1881	649	1238	314	900	408	47
18.2	0.05715	2.13155	0.080282	-1.88055		35	38	81	389	270	2100	593	1272	143	893	455	55
18.25	0.0575	1.86991	0.128731	-2.03179		27	37	71	458	321	1831	607	2181	343	786	457	82
18.3	0.05785	1.91115	-0.0258876	-2.08731		51	35	54	456	275	1908	710	1230	305	740	638	88
18.35	0.0582	2.19566	0.0413967	-2.22596		14	26	62	450	251	2164	630	1450	321	843	436	64
18.4	0.05855	2.28982	0.285103	-2.06451		34	27	57	433	283	2101	700	1305	143	898	248	22
18.45	0.0589	2.07152	0.0775549	-2.17749		31	28	78	436	267	1961	683	1558	126	734	318	107
18.5	0.05925	1.90908	0.0233654	-1.91229		22	42	102	458	291	1918	633	1260	189	998	732	105
18.55	0.0596	2.12348	0.0195547	-2.16909		20	26	69	395	232	1902	568	1316	192	600	541	66
18.6	0.05995	2.06137	0.0921886	-1.99855		40	33	61	441	267	1913	682	1242	214	664	234	85
18.65	0.06065	1.87726	-0.235707	-2.39999		38	24	69	429	209	1729	696	1361	321	914	510	85
18.7	0.061	2.15599	-0.0685208	-2.52383		22	20	82	380	233	2155	752	1184	299	1045	338	90
18.75	0.06135	2.05141	-0.00238727	-1.73278		46	42	98	387	237	1848	673	1178	80	887	179	100
18.8	0.0617	1.88064	-0.112152	-2.75517		38	18	88	396	253	1856	763	1468	368	1004	722	79
18.85	0.06205	2.03872	0.226224	-1.84752		20	44	60	352	350	2144	793	1360	331	798	619	91
18.9	0.0624	1.83239	0.248616	-1.86092		19	45	78	359	371	1808	757	1553	337	1086	405	123
18.95	0.06275	2.22813	0.325367	-2.43078		31	23	98	365	362	2427	735	1737	174	973	439	48
19	0.0631	2.14251	0.134433	-2.25331		24	27	81	338	294	2190	720	1460	361	879	376	58
19.05	0.06345	1.98791	0.261191	-2.76923		38	17	89	400	352	1979	714	1414	186	1150	542	84
19.1	0.0638	1.74819	0.376979	-2.27783		20	27	50	389	384	1513	741	1527	310	774	601	112
19.15	0.06415	2.05355	-0.0985469	-1.01006		59	84	69	456	209	1798	484	1019	157	625	333	24
19.2	0.0645	1.82062	-0.213924	-1.34728		75	66	69	499	205	1568	454	1232	206	783	363	40
19.25	0.06485	1.69249	0.146198	-1.36356		38	78	37	464	353	1657	641	2677	188	992	544	125
19.3	0.0652	2.08018	0.38073	-1.82233		34	38	45	520	344	1882	568	1674	74	906	634	36
19.35	0.06555	1.91682	0.235926	-1.69661		19	43	63	429	297	1595	531	1364	102	820	541	81
19.4	0.0659	1.81984	0.0509783	-1.81518		62	41	56	436	265	1554	668	1517	193	842	184	84
19.45	0.06625	1.88558	-0.156718	-1.82064		54	50	88	490	264	2035	660	1455	246	889	469	122
19.5	0.0666	2.04192	0.277717	-2.94116		51	13	81	433	325	1897	621	1464	138	991	381	73
19.55	0.06695	1.87034	0.232142	-2.09818		45	32	67	437	329	1693	647	1596	169	1058	286	80
19.6	0.0673	1.80806	0.2826	-2.57277		53	21	59	364	365	1678	626	1666	302	1004	442	92
19.65	0.06765	1.75201	0.00359429	-2.13111		44	33	82	459	279	1603	707	1374	189	1064	425	105
19.7	0.068	1.73964	-0.0614787	-1.81633		28	46	53	428	266	1611	628	1682	366	1110	740	66
19.75	0.06835	1.92048	-0.0206347	-1.90177		49	41	64	430	269	1874	690	1539	174	937	515	74
19.8	0.0687	1.82379	0.0964356	-1.72017		48	53	81	417	326	1834	666	1262	300	1094	340	94
19.85	0.06905	1.77313	0.165672	-1.3617		13	66	52	454	304	1517	669	1169	262	1324	370	91
19.9	0.0694	1.74035	0.0011447	-2.24504		53	31	99	417	293	1668	667	1196	257	926	506	124
19.95	0.0701	2.05844	0.213768	-1.78479		31	37	66	417	273	1727	583	1232	49	1142	306	72
20	0.07045	2.02759	0.308398	-2.29144		38	26	71	411	350	1953	590	1343	118	1142	456	87
20.05	0.0708	1.95907	0.375089	-2.25333		25	27	73	381	374	1823	756	1615	130	877	639	73
20.1	0.07115	1.79942	0.405449	-2.31145		41	30	89	389	454	1830	756	1734	202	1114	651	87
20.15	0.0715	1.62585	0.30105	-1.89111		51	44	55	467	394	1482	723	1334	227	907	500	113
20.2	0.07185	1.88764	0.199241	-2.3721		36	24	92	419	314	1699	806	1534	142	851	360	88
20.25	0.0722	1.81977	0.219568	-1.80211		54	49	59	407	370	1833	706	1516	99	1082	810	118
20.3	0.07255	1.55546	0.3768	-1.93022		25	45	79	370	452	1469	709	1525	485	978	574	123
20.35	0.0729	1.74689	0.201386	-2.44337		35	25	65	433	352	1651	739	1563	243	1250	739	87
20.4	0.07325	2.00705	0.233344	-2.37786		27	26	102	410	354	2086	707	1371	164	1026	555	120
20.45	0.0736	2.07415	0.25181	-2.19054		11	28	87	421	322	1992	656	1413	172	1109	498	95
20.5	0.07395	1.96966	0.341857	-1.31357		32	68	72	477	356	1813	780	1345	43	1009	332	94
20.55	0.0743	1.53666	0.264813	-1.75775		33	52	78	410	393	1402	677	1778	188	1008	441	186
20.6	0.07465	1.72698	0.266966	-2.23447		39	30	63	381	366	1576	762	1459	254	810	754	84
20.65	0.075	1.78914	0.284454	-2.56818		36	21	95	450	364	1639	782	1389	176	634	630	121
20.7	0.0753	1.89774	0.300662	-2.8261		44	15	101	373	342	1689	718	1363	202	935	581	45
20.75	0.0756	1.78557	0.250808	-2.07317		54	37	83	424	378	1754	756	1546	142	1054	525	98
20.8	0.0759	2.01064	0.252001	-2.52342		12	22	66	376	353	2049	812	1659	298	1112	729	118
20.85	0.0762	1.79655	-0.0383305	-2.08772		61	38	74	412	295	1848	760	1516	306	930	534	102
20.9	0.0765	1.9064	0.33908	-2.23438		38	27	62	392	354	1697	726	1625	95	1069	434	85
20.95	0.0768	2.01779	0.167465	-1.92155		17	39	80	389	315	2004	768	1443	345	830	584	53
21	0.0771	2.13163	0.269996	-2.81191		24	15	77	391	327	2104	769	1453	193	924	985	40
21.05	0.0774	1.77289	0.00515548	-1.72524		38	56	99	404	316	1851	738	1568	168	850	921	123
21.1	0.0777	2.0547	0.0832269	-2.75974		38	18	80	384	309	2219	770	1532	279	1036	557	102
21.15	0.078	1.92073	0.328239	-2.25035		20	28	78	417	369	1814	770	1715	141	1121	478	102
21.2	0.0783	1.8414	0.416421	-2.2157		26	31	55	359	431	1792	758	4040	307	737	418	78
21.25	0.0786	1.74902	0.228945	-1.92875		31	43	106	391	372	1701	746	2454	207	1075	433	73
21.3	0.0789	2.14329	0.330274	-2.43605		14	20	52	409	318	1949	768	1563	139	1128	450	65
21.35	0.0792	1.8891	0.485514	-1.21023		5	71	81	390	387	1575	707	1639	84	926	454	119
21.4	0.0795	1.87208	0.402109	-2.33376		19	26	81	403	401	1744	841	1687	189	976	500	94
21.45	0.0798	1.8422	0.444426	-3.22842		27	11	69	424	433	1752	716	2186	382	1023	377	138
21.5	0.0801	1.95652	0.463039	-2.25972		21	27	65	397	411	1830	711	1878	234	746	507	69
21.55	0.0804	2.19577	0.416587	-3.27229		23	8	69	398	320	1896	693	1569	88	866	537	57
21.6	0.0807	1.96689	0.344514	-2.51509		27	22	120	341	384	1945	800	1735	138	1049	531	85
21.65	0.081	1.88252	0.358345	-2.06142		33	37	80	343	416	1910	762	1792	256	1001	652	60
21.7	0.0814	1.8655	0.272318	-2.53356		34	24	84	379	397	1953	731	1871	287	979	692	109
21.75	0.0818	1.95559	0.408661	-2.41774		27	26	109	346	439	2062	716	1743	258	1067	457	101
21.8	0.0822	1.87033	0.393828	-2.08411		45	36	73	326	429	1878	753	1655	155	1027	690	81
21.85	0.0826	2.05009	0.492271	-2.68786		39	20	69	323	481	2284	813	1992	155	1166	574	130
21.9	0.083	1.71503	0.310701	-1.64597		47	66	98	332	467	1902	813	2275	233	1024	688	95
21.95	0.0834	1.75953	0.311406	-2.13551		44	38	89	303	439	1868	712	2063	292	1191	798	81
22	0.0838	1.70706	0.254335	-1.91844		48	46	106	279	404	1727	789	1872	272	963	667	76
22.05	0.0842	1.77587	0.536178	-2.18017		9	32	115	304	484	1672	885	1908	243	1135	555	126
22.1	0.0846	1.859	0.490997	-2.1631		23	33	106	307	469	1842	763	2226	219	908	629	69
22.15	0.085	1.71312	-0.00156908	-1.82119		62	59	87	284	364	2022	754	3106	241	970	580	261
22.2	0.0854	1.88097	0.344021	-2.57865		13	22	96	306	409	1902	706	2093	232	1155	609	224
22.25	0.0858	1.90622	0.220616	-2.2379		67	32	106	325	374	2018	679	1718	283	1040	504	55
22.3	0.0862	2.07884	0.0871476	-2.24175		26	30	104	320	308	2257	724	1513	287	829	746	73
22.35	0.0866	2.0246	-0.101364	-1.82413		24	45	89	333	252	2112	696	1735	304	792	545	82
22.4	0.087	2.03045	0.36635	-1.81047		23	44	79	317	388	2049	704	1634	154	1061	611	62
22.45	0.0874	1.94844	0.462464	-1.87665		37	43	99	252	446	1971	644	1787	181	1021	773	42
22.5	0.0878	1.99924	0.328005	-1.76824		49	59	108	286	480	2553	798	1979	156	1257	743	116
22.55	0.0882	1.87176	0.17681	-2.15359		43	39	100	319	401	2184	788	2276	290	1108	1051	73
22.6	0.0886	1.9234	0.189542	-1.94425		48	47	97	247	397	2248	722	2310	345	963	797	74
22.65	0.089	2.25337	0.456369	-2.09892		35	32	86	319	412	2485	654	2165	142	507	578	54
22.7	0.08935	2.09277	0.164825	-1.56091		21	60	102	325	337	2317	709	1730	269	1050	453	58
22.75	0.0897	1.98551	0.153796	-1.46383		51	73	119	306	368	2298	719	1589	266	933	555	54
22.8	0.09005	2.15943	0.552727	-1.95053		22	36	80	342	440	2194	690	1650	166	720	594	41
22.85	0.0904	2.05523	0.592972	-2.41747		40	27	97	369	548	2365	785	1738	303	761	756	50
22.9	0.09075	1.95138	0.599709	-2.04846		37	39	54	308	551	2129	739	1739	195	1039	748	107
22.95	0.0911	1.80436	0.402999	-2.14688		37	36	80	385	461	1872	745	2389	199	939	609	102
23	0.09145	1.93009	0.423193	-1.77634		14	48	108	409	433	1954	681	1622	170	857	720	93
23.05	0.0918	1.71564	0.386013	-2.48094		29	24	75	446	422	1595	631	1966	397	728	757	73
23.1	0.09215	1.7408	0.491046	-2.96632		47	15	83	367	476	1661	696	2103	167	1064	755	112
23.15	0.0925	1.72118	0.345653	-1.97204		49	46	103	373	467	1848	806	1769	214	924	754	107
23.2	0.09285	2.07134	0.468063	-3.0944		39	12	104	395	423	2102	631	2201	190	1132	570	41
23.25	0.0932	1.72176	0.231176	-2.11769		35	38	101	337	398	1767	840	2040	292	1319	690	68
23.3	0.09355	1.94277	0.591396	-3.34043		20	9	73	403	459	1773	778	1800	112	1117	940	102
23.35	0.0939	1.78391	0.354506	-1.66498		29	58	85	418	437	1825	641	1742	315	1252	670	49
23.4	0.09425	1.71908	0.385372	-2.5436		37	24	107	429	449	1704	745	1691	271	1013	576	106
23.45	0.0946	1.81102	0.562409	-2.3898		52	27	81	386	517	1802	693	1755	116	1126	723	91
23.5	0.09495	1.89643	0.658197	-3.04025		34	13	89	408	525	1811	689	1646	201	1149	608	67
23.55	0.0953	2.02096	0.60389	-2.3541		35	27	83	361	520	2145	637	1813	288	1119	359	66
23.6	0.09565	1.7426	0.135187	-1.89498		54	52	72	411	396	1976	665	1619	332	1200	863	122
23.65	0.096	1.98941	0.300754	-2.45418		27	25	77	410	393	2127	668	1695	412	1202	751	49
23.7	0.0963	1.55817	0.424087	-1.85366		34	53	88	405	517	1607	720	1804	368	1287	678	101
23.75	0.0966	2.06375	0.609239	-3.34839		27	9	89	396	471	2017	766	1988	148	1097	521	76
23.8	0.0972	1.78559	0.193409	-2.43501		61	27	91	343	374	1838	663	2044	174	1305	856	79
23.85	0.0975	1.78547	0.339743	-2.02066		51	42	88	379	445	1889	714	1899	149	1099	767	100
23.9	0.0978	1.94951	0.362357	-2.16475		27	29	52	315	363	1775	725	1671	148	1014	495	91
23.95	0.0981	1.89856	0.245937	-2.47364		47	23	118	323	349	1822	628	1357	237	1038	457	68
24	0.0984	1.78226	0.0529248	-1.68665		48	59	88	308	336	1894	837	1397	312	1076	596	96
24.05	0.0987	1.69654	0.202856	-1.63045		21	55	63	357	344	1532	718	1456	289	1097	689	77
24.1	0.099	2.14233	0.418679	-2.10567		5	29	97	327	362	2029	748	1814	244	1171	289	88
24.15	0.0993	1.7854	0.0956848	-2.22194		38	33	77	332	335	1815	687	1709	309	1114	654	123
24.2	0.0996	1.85015	0.410016	-1.70452		36	42	99	324	348	1469	719	1257	18	1060	579	93
24.25	0.0999	1.92875	0.082364	-2.09381		56	32	79	342	282	1787	744	1127	129	581	841	73
24.3	0.1002	1.80585	0.0276065	-1.4951		42	65	78	372	298	1764	678	1386	214	974	514	84
24.35	0.1005	2.10441	0.352979	-2.55681		40	17	68	380	312	1798	693	1287	59	950	347	72
24.4	0.1008	1.88764	0.118511	-2.34888		24	24	63	361	283	1660	688	1233	380	926	495	70
24.45	0.1011	1.9084	0.246897	-2.09216		41	35	87	375	363	1912	778	1830	147	973	560	73
24.5	0.1014	1.77843	0.325529	-2.60121		46	21	62	374	392	1676	760	1963	238	956	589	90
24.55	0.1017	1.93129	0.301734	-2.09616		35	34	79	367	374	1908	750	1814	150	1053	574	66
24.6	0.102	1.9555	0.376659	-2.27157		32	31	100	384	438	2124	764	1989	190	1256	497	85
24.65	0.10235	1.78454	0.309797	-2.17273		28	35	83	403	419	1831	706	1784	347	1116	563	103
24.7	0.1027	2.12888	0.307125	-2.34484		27	22	72	481	312	1929	776	1589	41	692	508	97
24.75	0.10305	1.79241	0.201262	-1.74173		35	49	42	475	342	1679	798	1749	156	900	837	71
24.8	0.1034	1.8039	0.336019	-2.24672		36	30	100	408	397	1723	824	1674	196	1188	240	117
24.85	0.10375	2.00065	0.345413	-2.10978		27	37	61	460	431	2256	833	1823	356	1032	556	77
24.9	0.1041	1.94366	0.555267	-3.41502		28	9	98	448	477	1912	675	2057	273	1250	436	85
24.95	0.10445	2.07786	0.430271	-2.64242		25	20	63	480	432	2244	717	1951	232	1045	640	76
25	0.1048	1.81268	0.251375	-2.00778		48	40	66	442	383	1825	812	1661	193	990	780	62
25.05	0.10515	1.91139	0.24145	-1.76831		42	52	84	508	388	2061	656	1701	182	883	586	82
25.1	0.10585	2.03815	0.126305	-2.25979		49	31	48	403	337	2280	751	1814	268	906	579	109
25.15	0.1062	2.19684	0.0671131	-1.87531		33	41	98	501	286	2406	643	1760	186	609	431	53
25.2	0.10655	2.08252	0.301301	-2.54128		52	25	118	342	429	2547	706	2089	323	996	557	69
25.25	0.10725	2.02103	0.420482	-2.11977		47	41	114	343	520	2577	746	2031	318	780	650	102
25.3	0.1076	2.27542	0.710666	-2.63646		10	19	89	297	540	2582	759	1816	365	980	734	48
25.35	0.10795	2.38876	0.680895	-1.8257		28	38	108	292	466	2571	594	1446	46	828	550	41
25.4	0.1083	2.13461	0.382036	-2.14119		43	32	88	340	399	2302	636	1344	162	854	630	59
25.45	0.10865	2.12029	0.489622	-2.29676		32	27	90	340	438	2237	721	1525	75	970	711	95
25.5	0.109	2.09076	0.261406	-1.99738		47	35	66	350	335	2087	694	1526	112	752	581	63
25.55	0.1093	2.06092	0.202943	-1.67454		54	54	83	371	353	2263	708	1418	369	894	690	20
25.6	0.1096	2.05183	0.0916906	-2.30945		35	28	105	389	309	2194	696	1574	290	704	577	72
25.65	0.1099	2.06762	0.0280749	-1.87132		59	44	60	366	294	2260	634	1584	341	861	620	43
25.7	0.1102	2.20245	0.299142	-1.83782		40	38	93	360	322	2160	759	1621	30	798	658	50
25.75	0.1105	2.04846	0.221506	-1.94469		38	40	78	386	349	2169	746	1445	172	842	516	82
25.8	0.1108	2.17548	0.417252	-3.56109		35	7	92	386	374	2170	754	1670	151	963	791	49
25.85	0.1111	2.07959	0.293923	-1.80657		21	47	81	330	384	2290	781	1586	321	899	506	72
25.9	0.1114	1.96986	0.068175	-2.20624		56	36	93	370	350	2344	775	1727	323	911	693	96
25.95	0.1117	2.05661	0.112025	-2.33342		33	28	78	369	323	2258	886	1436	265	947	696	78
26	0.112	1.89445	0.155943	-2.00859		41	38	79	434	331	1883	723	1427	159	698	602	116
26.05	0.1123	2.10707	0.269149	-2.14729		11	34	76	385	381	2394	850	1763	333	917	614	132
26.1	0.1126	1.96845	0.220823	-1.97381		46	43	84	426	386	2216	835	1785	254	774	419	104
26.15	0.1132	2.03791	0.276775	-1.81224		23	39	53	433	315	1833	712	1537	70	737	524	98
26.2	0.1135	1.98153	0.125641	-2.46571		40	23	74	424	307	1964	699	1544	251	765	694	62
26.25	0.1138	1.98348	0.336879	-2.10658		57	39	85	412	449	2330	692	1998	310	864	352	111
26.3	0.1141	2.10486	0.32097	-2.79007		32	18	87	462	404	2405	740	1784	354	914	440	95
26.35	0.1144	2.08629	0.141672	-2.25925		49	30	50	375	331	2314	648	2067	300	1050	449	79
26.4	0.1147	2.0268	0.0142467	-1.94585		26	40	114	400	284	2125	674	1598	289	885	566	52
26.45	0.115	1.90597	-0.203765	-2.3659		39	29	85	395	252	2078	738	1743	274	867	902	138
26.5	0.11535	1.94928	0.242183	-1.72467		11	54	86	440	386	2128	693	1787	374	1083	666	97
26.55	0.1157	1.7851	0.193767	-2.48567		46	26	82	426	379	1861	822	1980	226	885	746	120
26.6	0.11605	2.17883	0.182051	-1.83655		44	36	98	370	271	1996	551	1275	140	494	272	43
26.65	0.11675	2.00035	-0.203033	-1.72816		41	47	71	400	216	1956	521	1643	392	926	746	22
26.7	0.1171	2.19672	0.299756	-2.36081		10	23	66	291	329	2193	707	2593	191	743	604	88
26.75	0.11745	2.20761	0.317764	-2.41424		4	22	74	347	338	2237	789	2150	201	912	897	103
26.8	0.1178	2.08598	-0.0399792	-2.51396		65	23	87	285	273	2288	782	1693	177	862	598	99
26.85	0.11815	2.02363	-0.0566466	-1.5741		63	66	125	423	301	2410	667	1567	195	888	511	74
26.9	0.1185	2.01312	0.0609002	-1.8662		32	46	97	387	316	2226	661	1861	194	1050	778	63
26.95	0.11885	2.13018	0.175578	-2.34323		36	29	67	378	360	2542	720	2216	241	1162	820	65
27	0.1192	1.9656	0.120784	-1.80608		58	53	101	347	364	2303	787	1991	147	1118	600	91
27.05	0.11955	2.10242	0.225715	-2.07383		46	33	89	371	329	2149	703	1786	102	1043	294	77
27.1	0.1199	2.15886	0.152216	-2.17669		23	30	72	370	308	2291	685	1870	171	811	688	74
27.15	0.12025	2.08049	0.183663	-2.05186		24	37	87	390	346	2306	734	1895	239	865	470	100
27.2	0.1206	2.1928	0.198594	-2.84873		31	17	75	377	358	2630	794	1752	299	1048	662	101
27.25	0.12095	2.14659	0.164632	-2.35492		12	26	105	375	323	2344	779	2188	208	1106	467	105
27.3	0.1213	2.00473	0.267278	-2.30023		30	30	102	356	391	2222	815	1937	189	943	752	86
27.35	0.12165	2.13584	0.300282	-2.19532		20	31	57	370	376	2357	762	1651	183	991	1028	80
27.4	0.122	2.01093	0.20049	-2.87272		54	18	93	387	389	2378	864	2062	316	750	727	109
27.45	0.12235	2.28316	0.348613	-3.72892		29	6	86	375	354	2450	719	1847	142	915	879	80
27.5	0.1227	2.06812	0.347656	-2.59917		32	22	109	405	419	2341	717	1683	248	877	795	71
27.55	0.12305	2.18882	0.244838	-2.49331		38	24	70	389	371	2592	750	2993	276	879	454	61
27.6	0.1234	2.23528	0.248766	-1.90915		23	49	93	364	424	3091	810	2192	272	867	840	97
27.65	0.12375	2.3477	0.391993	-2.38505		33	28	78	335	450	3181	790	2559	158	1199	684	69
27.7	0.1241	2.16574	0.230723	-1.9326		47	50	126	384	435	3012	761	2314	151	1108	625	105
27.75	0.12445	2.29204	0.116759	-2.38108		33	32	106	405	389	3425	759	2178	334	892	731	136
27.8	0.1248	2.37617	0.149667	-2.28978		28	30	60	318	344	3188	805	2475	243	962	586	95
27.85	0.1255	2.30362	0.286799	-1.83186		40	50	73	341	416	3126	818	2508	150	963	540	83
27.9	0.12585	2.25683	0.23171	-2.34903		17	29	97	351	383	2902	816	2461	258	1074	783	76
27.95	0.1262	2.21244	0.29435	-1.45837		11	74	107	325	427	2907	889	2374	149	1111	941	93
28	0.12655	2.14061	0.164745	-2.09657		55	47	98	378	451	3253	774	2594	301	1046	812	136
28.05	0.1269	2.21999	0.0709044	-1.87501		37	51	85	352	357	3062	725	2180	253	1030	809	89
28.1	0.12725	2.21731	0.271403	-2.00968		36	47	71	373	460	3220	855	2786	311	1058	886	75
28.15	0.1276	2.50706	0.474328	-2.9504		31	14	92	329	430	3283	767	2377	61	890	536	137
28.2	0.12795	2.18885	0.1153	-2.17254		45	41	89	381	404	3213	759	2293	408	1017	962	84
28.25	0.1283	2.16042	0.27389	-2.16287		56	39	102	364	446	2942	760	2509	166	1075	969	66
28.3	0.12865	2.23002	0.448057	-1.76438		28	58	83	335	530	3149	823	2340	168	885	842	125
28.35	0.129	2.41381	0.26591	-1.87416		48	44	98	364	374	3204	675	2183	86	992	554	49
28.4	0.12935	2.13694	0.226227	-2.08089		66	44	84	382	442	2987	764	2377	327	1030	699	70
28.45	0.1297	2.23676	0.416395	-2.30529		48	34	92	347	517	3192	705	2355	260	895	905	82
28.5	0.13005	2.29842	0.158037	-1.94338		25	45	121	361	368	3129	727	2594	146	900	667	99
28.55	0.1304	2.28551	0.192806	-2.35664		47	30	83	319	384	3113	760	2884	320	1027	575	55
28.6	0.13075	2.42048	0.34074	-1.40493		33	74	96	298	424	3393	828	2411	32	1040	1046	81
28.65	0.1311	2.25485	0.0787519	-2.20256		40	38	95	324	372	3278	852	2466	425	1019	431	122
28.7	0.13145	2.21508	0.0449904	-2.22183		69	37	120	321	357	3127	796	2048	257	1145	668	71
28.75	0.1318	2.27473	0.349904	-2.58572		29	24	88	307	452	3098	735	2366	404	947	611	102
28.8	0.13215	2.37328	0.355074	-1.95401		27	46	109	312	463	3484	748	2247	240	969	565	91
28.85	0.1325	2.21973	0.311522	-1.89209		52	52	80	369	471	3175	787	2379	139	1184	952	81
28.9	0.13285	2.17398	0.153918	-1.83396		65	60	101	340	438	3302	791	2443	410	1106	874	53
28.95	0.1332	2.29486	0.207455	-2.05336		55	44	102	325	422	3403	798	2128	279	1152	1079	39
29	0.13355	2.23186	0.297768	-1.94028		55	48	93	382	450	3113	758	2416	128	1129	773	72
29.05	0.1339	2.28787	0.33242	-2.05657		13	41	106	337	447	3159	821	3234	263	1083	743	78
29.1	0.13425	2.26034	0.243287	-1.86383		24	49	79	328	403	3029	677	3900	300	872	876	44
29.15	0.1346	2.28077	0.25508	-1.87098		30	55	71	316	461	3495	781	2823	319	1172	770	114
29.2	0.13495	2.3818	0.193451	-2.10913		40	39	69	366	390	3479	714	2544	289	1113	397	98
29.25	0.1353	2.13501	0.116744	-2.17386		60	42	139	371	415	3123	758	2313	283	1068	621	116
29.3	0.13565	2.50415	0.220692	-2.05171		24	37	63	289	359	3522	733	2789	83	1193	808	97
29.35	0.136	2.25506	0.0877955	-1.75197		47	61	101	308	384	3354	697	2650	269	963	847	77
29.4	0.1363	2.28024	0.0278195	-2.04857		45	41	87	346	327	3110	777	2109	269	1004	874	49
29.45	0.1366	2.20064	0.0425324	-2.19106		28	36	82	360	336	2908	812	2774	280	980	760	91
29.5	0.1369	2.31901	0.277576	-2.22853		43	35	129	379	429	3304	777	2398	178	1013	502	79
29.55	0.1372	2.11846	0.32868	-2.53254		40	29	95	346	507	3036	818	3127	356	1031	786	129
29.6	0.1375	2.07405	0.202763	-2.01688		55	49	106	416	451	2930	812	2818	206	823	767	133
29.65	0.1378	2.34065	0.287382	-2.1999		29	35	93	378	421	3281	716	2899	122	1034	888	86
29.7	0.1381	2.27445	0.317105	-2.6074		64	24	90	406	447	3165	793	2814	160	772	711	91
29.75	0.1384	2.33909	0.110372	-2.24417		44	30	87	419	316	2935	714	2201	155	957	576	44
29.8	0.1387	2.20835	0.0887659	-2.06696		58	41	67	497	354	2948	680	2075	185	1038	736	81
29.85	0.139	2.09931	-0.0859505	-1.81493		43	63	109	429	355	3157	663	2381	413	1246	870	112
29.9	0.1393	2.16058	0.104222	-2.00921		40	47	96	374	389	3041	767	2246	348	959	727	103
29.95	0.1396	2.53698	0.296923	-2.81102		7	16	102	460	358	3363	758	1911	262	864	536	113
30	0.1399	2.21589	-0.0933203	-2.23814		40	37	116	426	316	3181	806	1976	266	1071	806	113
30.05	0.1402	2.34652	0.0732344	-2.05926		44	39	72	455	329	3195	761	2654	159	1007	466	75
30.1	0.1405	2.40141	-0.0178595	-2.12067		46	37	98	393	303	3405	671	2089	126	952	725	90
30.15	0.1408	2.31855	0.15799	-2.20235		57	37	104	378	392	3401	773	2074	236	1056	492	91
30.2	0.1411	2.45936	0.198224	-3.50991		42	9	80	394	367	3521	773	2135	401	1179	583	79
30.25	0.1414	2.29842	0.181653	-2.17472		60	38	102	391	401	3330	749	2121	134	1254	670	90
30.3	0.1417	2.32783	0.239565	-2.19689		34	37	72	397	423	3414	801	2547	337	1192	518	84
30.35	0.142	2.36733	0.204621	-2.36033		41	33	89	388	429	3730	848	2512	431	994	611	80
30.4	0.14235	2.22978	0.237647	-1.74171		48	63	88	376	456	3343	774	2694	201	1023	667	107
30.45	0.1427	2.29751	0.280627	-2.29283		38	36	98	371	472	3547	763	2618	250	1247	838	97
30.5	0.14305	2.26393	0.311424	-2.48459		34	29	137	379	475	3347	799	2282	279	1043	827	88
30.55	0.1434	2.26314	0.178186	-1.77018		55	58	90	417	407	3274	736	2102	173	1105	561	92
30.6	0.14375	2.3838	0.21771	-2.15106		27	38	87	404	406	3542	738	2131	291	1076	554	104
30.65	0.1441	2.43233	0.418707	-1.80007		29	51	112	358	469	3513	756	2317	116	690	706	77
30.7	0.14445	2.36509	0.441139	-2.66364		18	23	109	371	513	3513	807	2497	265	1047	916	108
30.75	0.1448	2.39302	0.327412	-2.57401		45	25	80	435	455	3590	753	2336	121	1058	867	124
30.8	0.14515	2.31969	0.205631	-1.67645		33	67	96	354	440	3644	706	2398	223	1066	761	121
30.85	0.1455	2.31309	0.206977	-2.19997		45	40	83	373	444	3648	753	2601	286	1076	928	97
30.9	0.14585	2.54203	0.273859	-2.27167		36	32	81	380	408	3942	762	2623	274	1141	366	61
30.95	0.1462	2.17117	0.377512	-2.06105		19	46	100	387	527	3168	721	3255	369	1266	850	94
31	0.14655	2.26063	0.0829745	-2.14165		48	44	89	429	407	3592	725	3888	241	1071	1047	85
31.05	0.1469	2.30396	0.303024	-2.8551		47	19	71	420	447	3306	786	3564	165	1091	645	131
31.1	0.14725	2.3453	0.247514	-2.45362		53	29	87	386	432	3520	730	2237	209	1209	553	121
31.15	0.14795	2.35935	0.305648	-2.63473		36	26	104	403	492	3836	745	2404	317	1162	779	135
31.2	0.1483	2.45936	0.338563	-2.34334		29	31	81	344	453	3777	752	2245	209	1324	705	91
31.25	0.14865	2.43477	0.539061	-2.54144		14	26	109	378	566	3768	822	2423	286	1309	645	109
31.3	0.149	2.33085	0.328547	-2.29249		62	36	99	369	495	3666	828	2221	157	997	704	140
31.35	0.14935	2.26456	0.34617	-2.39375		44	35	111	393	542	3691	712	2530	357	1285	797	114
31.4	0.1497	2.26031	0.211791	-1.94769		44	54	106	350	468	3630	705	2495	324	1124	725	125
31.45	0.15005	2.28137	0.170355	-2.41697		49	34	101	426	452	3732	838	2502	387	1154	840	99
31.5	0.1504	2.54958	0.37827	-2.62741		36	20	31	393	404	3543	752	2459	169	1010	645	79
31.55	0.15075	2.34221	0.313289	-2.13772		12	35	79	359	406	3088	786	2210	293	1318	639	73
31.6	0.1511	2.27206	0.222095	-1.82501		36	55	86	424	426	3309	779	2000	225	1308	579	92
31.65	0.15145	2.32188	-0.0970649	-2.0013		64	49	105	456	329	3696	714	1915	248	1320	725	87
31.7	0.1518	2.41991	0.126994	-1.97307		42	42	92	460	343	3397	699	1787	160	999	528	63
31.75	0.15215	2.33573	0.139337	-2.07541		69	44	99	330	403	3624	740	1907	254	1274	606	86
31.8	0.1525	2.63279	0.345093	-1.67228		7	54	84	359	406	4000	683	2022	206	1197	723	70
31.85	0.15285	2.37791	0.388221	-1.93056		30	49	77	348	498	3642	801	2906	164	1074	753	100
31.9	0.1532	2.44028	0.482955	-2.43202		46	29	109	332	535	3788	693	2370	231	1015	548	81
31.95	0.15355	2.35707	0.351999	-2.46399		48	31	101	398	518	3847	793	2584	235	1236	794	97
32	0.1539	2.33795	0.436971	-1.96092		40	47	97	367	517	3460	708	2574	182	1011	615	78
32.05	0.15425	2.37424	0.425187	-2.07385		39	41	85	363	499	3504	682	2249	246	1094	468	87
32.1	0.1546	2.43589	0.523462	-2.28087		24	31	74	286	512	3466	699	2554	255	1014	724	65
32.15	0.15495	2.35441	0.452218	-1.88922		34	53	113	345	551	3692	727	2092	240	862	633	121
32.2	0.1553	2.35436	0.298086	-2.62292		53	25	84	295	464	3627	758	2014	273	1235	999	98
32.25	0.15565	2.25367	0.309227	-2.35062		51	34	102	305	486	3397	808	2293	308	1447	621	93
32.3	0.156	2.32535	0.352672	-2.29654		20	35	124	342	495	3559	758	2357	360	1120	860	97
32.35	0.15635	2.23705	0.227101	-1.90068		50	53	98	343	445	3321	827	2294	165	1183	787	103
32.4	0.1567	2.32248	0.327419	-1.93203		30	45	90	341	431	3169	763	2216	106	997	799	100
32.45	0.15705	2.21277	0.249471	-1.79488		57	58	88	331	448	3191	726	1893	123	1057	859	155
32.5	0.1574	2.22176	0.31441	-2.28391		50	34	104	310	457	3078	717	2028	220	1150	773	87
32.55	0.15775	2.2883	0.369667	-2.0832		32	37	94	308	430	2929	731	2035	84	1251	754	93
32.6	0.1581	2.3912	0.535775	-2.30827		25	27	107	327	464	2967	713	2001	74	1278	666	55
32.65	0.15845	2.39259	0.542494	-1.71927		38	50	96	283	480	3053	692	2017	76	892	305	102
32.7	0.1588	2.34965	0.351883	-1.88535		14	49	80	292	459	3384	723	2070	311	1095	815	124
32.75	0.15915	2.29978	0.385118	-2.70386		54	22	93	293	483	3277	752	1913	302	1293	672	82
32.8	0.15985	2.45175	0.151102	-1.80595		24	51	84	332	361	3603	680	2012	271	1213	667	60
32.85	0.1602	2.2551	0.26576	-1.99406		24	43	68	334	412	3012	667	2202	217	1353	721	109
32.9	0.16055	2.47815	0.414616	-3.04146		63	13	101	335	412	3244	766	1937	38	1298	717	85
32.95	0.1609	2.33806	0.265503	-2.63638		43	24	97	346	437	3472	722	2006	279	1010	984	95
33	0.16125	2.31422	0.526469	-2.82251		54	19	110	324	541	3233	754	2068	151	1246	657	92
33.05	0.1616	2.31999	0.307847	-1.92938		52	49	80	329	459	3433	654	1991	256	1029	566	106
33.1	0.16195	2.37131	0.479405	-3.29857		19	11	94	298	481	3190	766	5381	106	1280	734	132
33.15	0.1623	2.00922	0.332646	-2.17966		19	39	131	438	481	2572	745	2163	229	1196	808	151
33.2	0.16265	2.34341	0.0691817	-1.34252		46	68	85	397	279	2712	505	1302	266	617	341	33
33.25	0.163	2.4565	0.217399	-1.71544		51	44	82	360	304	2853	480	1310	89	658	542	40
33.3	0.16335	2.47196	0.181821	-1.49333		44	53	74	351	283	2795	532	1714	170	737	340	16
33.35	0.1637	2.38242	0.315032	-1.83414		31	45	82	311	386	3051	656	1783	215	1106	510	42
33.4	0.16405	2.50201	0.246125	-2.30332		36	25	88	326	320	3054	685	2001	84	875	415	57
33.45	0.16475	2.35026	0.28786	-1.96208		39	39	92	298	370	2910	655	1775	91	960	585	78
33.5	0.1651	2.39881	0.349746	-2.24302		34	30	75	273	401	3112	721	1666	178	1013	555	83
33.55	0.16545	2.35993	0.462929	-2.34508		53	26	70	344	431	2873	607	1818	104	1035	592	55
33.6	0.1658	2.13489	-0.0532261	-2.24443		62	37	76	342	331	2952	715	1871	367	1054	898	121
33.65	0.16615	2.54911	0.405377	-1.96175		27	36	82	313	384	3276	578	1626	91	751	539	73
33.7	0.1665	2.21552	0.299598	-1.66135		63	66	98	395	469	3186	646	1751	154	1012	764	96
33.75	0.16685	2.32833	0.405561	-1.79413		45	45	79	381	406	2777	710	1864	114	914	291	56
33.8	0.1672	2.41935	0.367583	-2.33552		42	27	78	382	403	3136	692	1625	116	902	576	77
33.85	0.16755	2.21686	0.451472	-2.28073		34	30	46	421	461	2694	705	1874	252	885	707	80
33.9	0.1679	2.38463	0.546799	-2.45293		26	25	95	347	502	3154	688	2136	261	910	336	91
33.95	0.16825	2.12464	0.3802	-1.81493		29	53	64	339	476	2724	784	2012	266	1083	636	113
34	0.1686	2.4171	0.537905	-2.87654		24	15	72	360	456	2986	695	1703	276	1001	431	71
34.05	0.16895	2.17149	0.432652	-2.2792		47	35	96	415	527	2999	702	1884	194	992	1139	85
34.1	0.1693	2.25891	0.474633	-2.30185		34	32	80	368	514	3061	699	1825	376	1001	738	64
34.15	0.16965	2.36692	0.579141	-1.77025		46	48	82	326	503	3006	813	1553	65	808	552	77
34.2	0.17	2.34818	0.446009	-2.16751		28	34	96	322	464	3109	723	3633	283	842	301	59
34.25	0.1703	2.14168	0.209907	-2.20339		50	41	93	361	458	3161	773	4853	268	1240	558	99
34.3	0.1706	2.3293	0.384567	-3.09565		37	15	90	355	487	3405	733	2009	480	1171	739	98
34.35	0.1709	2.32125	0.399069	-2.43982		43	31	113	333	530	3623	797	1880	380	1094	649	105
34.4	0.1712	2.28952	0.626602	-2.09469		12	40	108	395	608	3207	763	1929	334	1248	942	60
34.45	0.1715	2.33806	0.620531	-1.961		70	46	107	315	608	3387	759	1884	189	862	550	52
34.5	0.1718	2.28702	0.401289	-2.15531		26	37	98	342	477	3144	769	2073	293	1018	619	79
34.55	0.1721	2.38918	0.491958	-2.40055		32	26	99	377	469	3127	712	2021	121	1071	984	37
34.6	0.1724	2.46558	0.675089	-3.1034		31	12	89	322	525	3146	773	1965	86	1047	746	74
34.65	0.1727	2.29881	0.506789	-1.71783		37	68	108	376	629	3775	785	2141	216	989	786	128
34.7	0.173	2.49858	0.621102	-3.1787		48	13	115	340	581	3798	671	2091	380	814	622	59
34.75	0.1733	2.47422	0.550792	-2.19492		35	33	91	368	514	3518	762	1892	151	1034	441	66
34.8	0.1736	2.47751	0.459819	-2.35559		15	30	86	375	501	3768	751	1953	331	1250	544	111
34.85	0.1739	2.73282	0.630195	-1.96506		4	35	100	320	469	3840	740	1808	115	983	699	69
34.9	0.1742	2.38315	0.327959	-2.06164		58	44	76	347	480	3748	837	1855	246	1123	662	85
34.95	0.1745	2.46143	0.466024	-1.74922		29	55	78	378	504	3707	758	2100	268	864	483	64
35	0.1748	2.45613	0.538769	-2.53021		48	25	112	340	538	3660	714	2564	160	1015	611	56
35.05	0.1751	2.45898	0.443952	-1.85296		33	53	94	348	527	3953	838	2068	269	1095	482	76
35.1	0.1754	2.44862	0.51248	-2.4263		42	28	87	324	529	3667	794	2065	208	686	563	121
35.15	0.1757	2.44404	0.353448	-1.73954		33	55	83	379	446	3608	716	1890	374	759	414	61
35.2	0.176	2.39454	0.454935	-1.88847		48	48	104	394	500	3478	712	1825	196	781	475	67
35.25	0.1763	2.57795	0.395926	-2.02444		41	36	79	368	405	3590	678	1965	107	891	518	41
35.3	0.1766	2.57702	0.367384	-2.9581		44	16	106	368	445	4055	820	1918	280	881	378	101
35.35	0.1769	2.62301	0.420457	-2.4406		22	25	101	362	437	3954	763	1996	124	765	604	103
35.4	0.1772	2.7451	0.498999	-3.45465		34	8	81	425	417	3941	744	2017	125	836	701	41
35.45	0.1775	2.48272	0.377098	-2.42102		52	29	64	396	476	3909	814	2176	185	934	962	70
35.5	0.1778	2.41172	0.263141	-2.00835		47	49	109	350	475	4072	739	1918	314	982	821	92
35.55	0.1781	2.57	0.449501	-2.17399		52	37	74	364	510	4251	827	1895	221	879	914	45
35.6	0.1784	2.51284	0.478221	-2.35153		42	34	85	355	576	4406	797	1994	265	1080	830	104
35.65	0.1787	2.51415	0.371748	-2.00068		35	47	90	341	504	4294	777	2003	477	1052	418	87
35.7	0.179	2.47315	0.451829	-2.07208		68	44	117	357	549	4144	782	2184	231	823	677	53
35.75	0.1793	2.51792	0.425445	-1.97984		49	49	136	353	543	4401	772	2193	192	943	605	78
35.8	0.1796	2.62117	0.583273	-2.04862		26	40	96	373	556	4267	784	2017	130	784	474	118
35.85	0.1799	2.61387	0.379155	-2.46082		40	26	102	366	445	4158	717	2096	181	1113	598	49
35.9	0.1802	2.49764	0.529236	-2.46471		49	28	85	349	559	4002	721	2350	312	818	543	76
35.95	0.1805	2.71083	0.891628	-2.83487		12	15	116	457	623	3842	597	1983	150	700	388	70
36	0.1811	2.58768	0.123824	-1.95562		61	33	59	480	264	3102	445	1107	302	531	541	13
36.05	0.1814	2.84065	0.175311	-1.30279		21	52	69	463	228	3277	434	1228	139	584	305	7
36.1	0.1817	2.84423	0.180817	-2.21312		34	23	63	438	252	3615	479	1505	70	554	413	33
36.15	0.182	2.71066	0.27197	-2.32911		27	23	74	407	310	3552	540	1530	208	563	336	45
36.2	0.18235	2.75013	0.475537	-2.02928		45	29	100	396	355	3452	506	1380	117	559	307	15
36.25	0.1827	2.71305	0.211824	-1.58969		72	51	90	393	309	3769	521	1346	184	524	324	18
36.3	0.18305	2.80727	0.187626	-1.96341		11	32	113	401	275	3776	513	1271	274	651	292	35
36.35	0.1834	2.73174	0.0991979	-1.93405		39	36	87	341	275	3825	488	1538	138	754	489	34
36.4	0.18375	2.70082	0.249811	-1.55494		16	51	83	296	310	3596	606	1514	236	475	342	50
36.45	0.1841	2.60883	0.495757	-2.05287		15	38	92	288	486	4021	741	2073	306	1002	543	60
36.5	0.18445	2.51914	0.563274	-2.29356		19	32	125	318	557	3938	693	2245	211	1139	779	67
36.55	0.1848	2.53162	0.614412	-2.29056		47	34	106	290	621	4224	622	2223	358	731	923	48
36.6	0.18515	2.61156	0.521185	-2.04376		33	42	127	276	546	4416	769	2204	154	870	445	114
36.65	0.1855	2.5465	0.473535	-1.99498		36	41	112	293	484	3847	733	1948	236	775	362	66
36.7	0.18585	2.58694	0.342252	-1.51405		39	65	108	355	416	3926	682	2138	66	858	462	73
36.75	0.18655	2.52888	0.319255	-1.71676		17	50	90	318	383	3490	669	1702	329	699	875	29
36.8	0.1869	2.58937	0.341794	-1.26244		46	77	87	344	383	3625	682	1470	61	600	636	48
36.85	0.18725	2.60906	0.334008	-2.00632		34	39	87	283	405	3940	646	1474	242	678	690	63
36.9	0.1876	2.62939	0.566368	-1.40939		21	66	81	303	476	3746	720	1698	190	494	388	56
36.95	0.18795	2.7	0.55839	-1.87522		63	40	89	285	456	3882	546	1614	180	459	447	27
37	0.18865	2.96264	0.442061	-2.07623		71	27	56	265	335	4166	534	3176	18	459	446	40
37.05	0.189	2.79919	0.561058	-1.60967		33	51	87	288	447	4191	617	2145	36	619	493	66
37.1	0.18925	2.75383	0.322661	-1.70498		47	52	106	290	395	4492	560	1766	214	774	598	23
37.15	0.1895	2.76816	0.133183	-1.53182		64	63	86	266	333	4643	569	1666	277	479	599	35
37.2	0.18975	3.05902	0.434714	-1.84333		45	33	99	243	322	4442	529	1795	132	472	446	5
37.25	0.19	2.62965	0.206245	-1.54749		59	67	106	282	387	4367	578	1819	257	554	662	48
37.3	0.19025	2.80695	0.388723	-1.63269		47	51	89	299	385	4322	606	1698	184	562	553	16
37.35	0.1905	2.95552	0.403393	-1.92315		37	33	113	312	338	4338	583	1447	130	227	260	43
37.4	0.19075	2.78852	0.601715	-2.43803		21	20	80	281	418	3723	582	1632	169	458	448	43
37.45	0.191	2.76126	0.30279	-1.90317		62	38	66	321	345	4032	639	1554	176	499	264	47
37.5	0.19125	2.80998	0.328261	-1.46989		36	52	90	288	314	3756	500	1420	96	541	446	19
37.55	0.19175	2.6224	0.368361	-1.93672		75	40	76	251	401	3820	649	1486	253	637	636	24
37.6	0.192	2.49728	0.306571	-1.3831		51	79	77	288	428	3827	661	1557	237	579	563	82
37.65	0.19225	2.82562	0.26662	-2.56968		55	19	96	234	324	4187	589	1559	103	540	658	51
37.7	0.1925	2.82363	0.603518	-1.51366		33	52	79	249	432	3978	645	1746	55	544	595	26
37.75	0.19275	2.72017	0.316248	-1.47021		30	63	110	246	376	4161	571	1618	298	428	476	40
37.8	0.193	2.84174	0.572108	-1.34435		34	64	119	250	435	4209	603	1656	210	505	636	6
37.85	0.1935	2.61726	0.300384	-1.53606		48	62	108	267	389	3946	609	1768	206	639	583	30
37.9	0.194	2.76415	0.505069	-1.50736		20	54	91	262	404	3868	543	1730	280	668	693	9
37.95	0.19435	2.89025	0.599845	-1.24921		41	65	76	342	413	4080	538	1655	47	618	339	18
38	0.1947	2.7579	0.686706	-1.97377		41	33	119	304	472	3745	612	1601	101	437	507	17
38.05	0.19505	2.90981	0.401121	-2.11533		61	26	104	312	322	3957	480	1559	110	612	509	6
38.1	0.1954	2.81428	0.579173	-1.51696		32	52	85	269	423	3954	536	1659	114	508	331	29
38.15	0.19575	2.79392	0.48136	-1.71586		46	41	96	318	369	3727	567	1579	112	638	390	10
38.2	0.1961	2.75364	0.187442	-1.60758		37	51	113	291	307	3996	620	1511	126	499	687	24
38.25	0.19645	2.87025	0.379522	-1.35305		51	58	67	291	328	3959	610	1563	48	620	349	22
38.3	0.1968	2.58298	0.186665	-1.89857		64	43	88	279	346	3800	659	1788	256	595	819	24
38.35	0.19715	2.59878	0.302357	-1.79443		62	50	91	277	407	4045	650	1791	348	639	749	22
38.4	0.1975	2.7458	0.426644	-1.59358		49	50	109	334	377	3833	544	1557	156	705	456	9
38.45	0.19785	2.62864	0.395809	-1.60139		57	57	91	351	420	3917	537	1516	209	589	762	20
38.5	0.1982	2.54529	0.320068	-1.99987		50	40	111	302	407	3767	576	1554	235	624	783	42
38.55	0.19855	2.62693	0.325595	-1.55749		48	61	119	331	401	4005	576	1453	135	657	665	38
38.6	0.1989	2.49074	0.103617	-1.42683		55	79	119	319	365	3972	664	2508	222	680	958	28
38.65	0.19925	2.70039	0.298933	-1.64698		39	51	73	388	357	3941	609	1932	173	669	407	27
38.7	0.19995	2.81314	0.612694	-1.28362		30	62	76	340	413	3729	572	1681	96	536	479	9
38.75	0.20065	2.44997	0.519489	-1.78134		75	57	122	297	569	3922	570	1869	280	602	728	50
38.8	0.201	2.61745	0.806356	-2.96147		46	14	65	303	606	3707	619	1895	185	777	801	40
38.85	0.2013	2.5697	0.344587	-2.2517		45	29	96	360	389	3600	577	1800	222	753	365	48
38.9	0.2016	2.46026	0.226301	-1.44682		42	73	110	342	389	3632	620	2442	309	681	300	51
38.95	0.2019	2.37956	0.420893	-1.61918		45	68	85	322	523	3708	701	2221	356	902	398	83
39	0.2022	2.50582	0.383548	-1.89099		22	47	101	395	457	3816	743	1952	152	1035	512	99
39.05	0.2025	2.60737	0.299385	-2.38335		26	24	91	425	351	3529	570	1727	109	748	590	68
39.1	0.2028	2.60626	0.300973	-2.35173		44	26	56	409	369	3700	626	1826	103	837	634	77
39.15	0.2031	2.34166	0.248098	-1.96827		61	46	90	473	422	3424	708	1638	192	761	761	73
39.2	0.2037	2.53641	0.367579	-2.14049		41	32	68	517	393	3438	594	1646	213	756	420	40
39.25	0.204	2.54212	0.426594	-2.19256		39	29	88	496	398	3301	566	1509	141	572	450	47
39.3	0.2046	2.73879	0.574809	-2.1852		10	20	63	550	316	2751	493	1052	93	419	175	47
39.35	0.2049	2.69612	0.0506506	-1.61008		27	38	68	564	200	2818	460	863	183	506	456	6
39.4	0.2052	2.57316	-0.064105	-0.880073		51	88	69	576	199	2781	431	1424	35	564	240	29
39.45	0.2055	2.90463	0.405533	-0.912048		23	64	67	544	239	2909	443	1226	33	375	97	11
39.5	0.2058	2.56666	0.18168	-2.58699		35	16	60	578	255	2769	486	1218	183	458	322	39
39.55	0.2064	2.60161	0.168495	-1.57564		21	43	68	575	246	2803	463	1134	156	578	182	31
39.6	0.207	2.36875	0.353452	-1.48061		44	54	96	597	338	2536	452	1053	201	437	285	23
39.65	0.2073	2.75611	-0.0298779	-1.56333		47	41	39	618	190	3081	364	909	193	347	478	11
39.7	0.2076	2.71621	-0.165329	-1.44373		60	44	76	674	158	2819	352	1063	114	274	100	25
39.75	0.2088	2.58103	0.182389	-2.02303		30	27	58	560	245	2697	423	1950	156	552	283	15
39.8	0.2091	2.84444	0.348875	-1.80372		47	28	70	567	241	2923	407	1387	26	441	175	14
39.85	0.2106	2.67995	0.543424	-1.16955		59	66	85	443	366	3100	466	1283	135	405	391	4
39.9	0.2112	2.66062	0.39964	-1.6856		47	43	88	439	346	3319	555	1694	82	534	206	32
39.95	0.2115	2.83503	0.324267	-1.34835		59	46	61	476	245	3017	371	1416	34	403	134	17
40	0.2118	2.5452	-0.0829625	-1.39177		44	57	71	424	211	2922	442	1385	226	525	271	23
40.05	0.2121	2.59518	0.320655	-1.79961		50	36	93	430	300	2917	462	1178	131	542	291	16
40.1	0.2127	2.70343	0.177037	-2.36746		46	19	96	399	242	3027	473	1385	96	402	243	32
40.15	0.213	2.64647	0.515925	-2.45705		7	20	79	442	391	3292	513	1610	114	689	593	108
40.2	0.2133	2.3957	0.424774	-1.93372		29	40	67	386	423	3036	488	1677	283	657	561	61
40.25	0.2136	2.65715	0.376606	-1.9983		52	32	81	409	344	3365	473	1649	174	603	382	15
40.3	0.2142	2.87397	0.464694	-1.17182		20	51	98	415	262	2915	433	1357	31	524	262	5
40.35	0.2145	2.6682	0.110632	-2.03161		21	27	59	371	230	2968	420	1012	248	504	461	28
40.4	0.2148	2.47591	0.168592	-1.63787		37	45	73	350	274	2753	455	1415	217	524	252	40
40.45	0.2151	2.54195	0.150012	-1.56052		47	47	92	261	260	2843	501	1380	166	701	250	20
40.5	0.2154	2.44889	0.0407579	-1.51362		27	56	59	368	265	2945	456	1639	189	648	640	49
40.55	0.2157	2.72571	0.221806	-2.53503		31	16	38	358	252	3082	560	1563	154	603	224	48
40.6	0.2163	2.48215	0.604949	-2.55912		44	18	56	373	426	2784	600	1920	114	847	245	47
40.65	0.2166	2.50563	0.480563	-2.33719		23	23	62	338	385	2917	686	2225	83	775	372	73
40.7	0.2169	2.24249	0.561445	-1.59864		38	64	70	345	555	2981	749	2475	93	780	674	115
40.75	0.2172	2.56404	0.763768	-3.34163		23	9	112	385	546	3304	779	2397	73	924	510	71
40.8	0.2175	2.43998	0.785392	-3.73277		20	6	82	310	550	2877	671	2521	168	834	702	77
40.85	0.2178	2.37458	0.433911	-2.57263		30	23	77	304	465	3238	678	2850	185	1122	574	100
40.9	0.2181	2.43466	0.616714	-2.01654		10	37	88	384	515	3172	722	3405	69	1007	575	106
40.95	0.2184	2.43409	0.451738	-2.51354		60	25	97	358	485	3521	694	4413	117	958	463	53
41	0.2187	2.5179	0.56814	-2.81963		25	15	83	399	444	3120	654	2817	237	810	203	52
41.05	0.219	2.39803	0.298787	-2.29148		37	30	85	391	400	3264	742	2252	190	1038	264	111
41.1	0.2197	2.41848	0.583596	-1.98349		24	36	97	386	469	2938	660	2458	42	869	424	92
41.15	0.22005	2.49778	0.681252	-2.69177		26	18	114	412	525	3229	712	2307	73	830	812	41
41.2	0.2204	2.40778	0.434669	-2.28786		42	32	90	405	487	3503	791	2574	289	703	411	68
41.25	0.22075	2.39644	0.535292	-2.80482		55	18	67	405	508	3267	618	2312	337	757	343	86
41.3	0.2211	2.56823	0.671578	-2.06093		25	35	76	407	538	3585	779	2784	87	708	452	59
41.35	0.22145	2.23316	0.504218	-2.45884		26	28	104	411	542	3054	739	2620	253	1039	498	116
41.4	0.2218	2.45039	0.63072	-2.34632		38	27	84	403	530	3270	753	2580	72	793	314	121
41.45	0.22215	2.59423	0.697923	-2.36099		11	23	77	375	490	3264	736	3198	87	922	282	71
41.5	0.2225	2.33885	0.570413	-2.04521		12	37	88	388	506	2966	829	2832	233	879	457	60
41.55	0.22285	2.26785	0.492265	-2.60469		27	23	98	384	509	3005	764	2568	286	974	401	105
41.6	0.2232	2.3891	0.553959	-2.74577		20	19	68	432	515	3227	737	3124	295	943	427	89
41.65	0.22355	2.40901	0.512311	-2.66366		7	20	74	421	479	3192	734	3403	276	956	546	130
41.7	0.2239	2.32192	0.41491	-2.43772		35	27	83	417	468	3151	713	2523	264	718	519	89
41.75	0.22425	2.34146	0.505726	-2.41397		47	28	94	421	519	3254	874	2418	113	949	482	92
41.8	0.2246	2.25625	0.369312	-2.26553		36	34	74	344	474	3128	739	2497	394	752	509	119
41.85	0.22495	2.4713	0.492826	-2.97082		21	15	91	364	479	3464	744	2842	227	894	647	82
41.9	0.2253	2.32875	0.611337	-2.14141		33	35	109	346	549	3058	703	3201	101	781	392	96
41.95	0.22565	2.40243	0.545043	-2.19672		18	35	73	375	543	3479	646	2832	243	1017	644	100
42	0.226	2.32526	0.600491	-2.68604		35	20	97	314	535	3002	715	2923	218	919	593	48
42.05	0.2263	2.35379	0.497428	-2.2945		53	32	138	371	522	3341	689	2798	129	817	436	78
42.1	0.2266	2.48725	0.569446	-2.76088		22	19	95	351	531	3614	740	2489	274	793	588	86
42.15	0.2269	2.35491	0.39641	-2.29123		49	33	93	355	485	3438	741	2414	249	974	739	51
42.2	0.2272	2.46231	0.604344	-2.89038		50	17	96	373	560	3590	636	2200	163	875	690	80
42.25	0.2275	2.53461	0.786947	-2.13176		30	29	109	359	537	3083	671	1969	36	730	506	46
42.3	0.2278	2.48631	0.460523	-2.16372		41	34	113	353	469	3556	641	2172	282	852	559	26
42.35	0.2281	2.50893	0.445735	-1.932		36	41	79	352	442	3479	803	2243	72	882	452	81
42.4	0.2284	2.38124	0.385883	-2.49806		36	26	101	361	465	3420	711	2454	100	1036	651	156
42.45	0.2287	2.44493	0.494468	-2.44997		35	28	76	338	532	3741	727	2122	193	1019	853	105
42.5	0.229	2.31012	0.591651	-3.09556		36	15	83	352	599	3340	789	2665	305	1116	655	119
42.55	0.2293	2.36227	0.478169	-2.81952		57	20	103	393	541	3560	844	2752	188	1074	454	107
42.6	0.2296	2.47206	0.550475	-2.09421		28	38	77	360	535	3655	755	2786	185	843	432	91
42.65	0.2299	2.58548	0.388755	-2.60925		35	22	103	314	441	3967	641	2078	303	760	454	84
42.7	0.2302	2.4469	0.579897	-2.88951		55	17	117	320	546	3532	689	2171	174	752	601	84
42.75	0.2305	2.50007	0.551989	-2.31021		45	30	112	342	525	3683	819	2168	51	1232	502	104
42.8	0.2308	2.44687	0.623706	-2.59836		39	25	90	319	627	3882	862	2032	256	988	687	100
42.85	0.2311	2.37033	0.325985	-1.90071		42	52	98	332	482	3723	732	2196	249	1140	795	68
42.9	0.2314	2.54691	0.575257	-1.88612		26	43	98	333	504	3620	731	2288	33	991	656	113
42.95	0.232	2.48302	0.578826	-1.94382		19	39	90	331	486	3263	660	2055	145	604	609	66
43	0.2323	2.30905	0.405923	-1.91965		31	43	94	408	440	2951	644	2022	189	503	517	95
43.05	0.2326	2.29907	0.491211	-2.50886		73	23	124	391	462	2817	702	2496	88	888	513	35
43.1	0.2329	2.24189	0.596809	-2.40929		26	24	63	400	485	2513	732	2399	103	931	468	87
43.15	0.2332	2.31886	0.572996	-2.11051		37	33	81	420	483	2768	690	2478	138	956	246	54
43.2	0.2335	2.06927	0.565786	-2.24468		35	34	100	395	565	2541	750	2810	367	849	560	48
43.25	0.2338	2.24642	0.705697	-2.13727		10	30	75	413	515	2404	669	2606	85	981	446	98
43.3	0.2344	2.35774	0.895516	-2.70027		6	18	107	373	656	2831	744	2901	307	959	302	89
43.35	0.2347	2.21676	0.763251	-2.83478		35	19	115	420	694	2969	738	2960	208	1092	488	82
43.4	0.235	2.19472	0.837945	-2.58306		25	25	110	416	765	2971	817	3405	189	873	478	121
43.45	0.2353	2.29925	0.726133	-2.05285		17	39	86	395	628	3028	733	2717	160	1236	611	60
43.5	0.2356	2.3687	0.525794	-2.73997		39	20	74	360	524	3309	758	2623	274	1066	556	67
43.55	0.2362	2.39592	0.748377	-2.74173		10	19	96	391	623	3236	868	2541	177	1140	498	135
43.6	0.2365	2.26512	0.405843	-3.06184		41	16	88	420	513	3293	866	2520	270	1418	784	95
43.65	0.2368	2.34805	0.50695	-1.88579		38	53	109	412	580	3656	743	2137	181	974	540	114
43.7	0.2374	2.28976	0.570914	-2.45922		36	30	95	421	621	3464	793	2480	207	1086	565	150
43.75	0.238	2.42045	0.764132	-2.94025		19	16	93	363	650	3406	742	2550	176	1027	663	115
43.8	0.2383	2.57718	0.825858	-3.54833		34	8	95	394	635	3659	748	2243	167	942	444	77
43.85	0.2386	2.42787	0.646214	-2.21934		31	34	86	343	597	3546	771	2074	163	1148	421	106
43.9	0.2389	2.31494	0.586451	-2.27498		29	37	94	360	647	3644	786	2406	395	1277	531	109
43.95	0.2392	2.39297	0.847216	-2.55628		38	29	93	380	872	4091	857	2394	396	1089	737	82
44	0.2395	2.44931	0.932452	-3.12799		18	14	110	356	812	3701	765	2952	271	1149	656	83
44.05	0.2398	2.62021	0.90581	-2.64093		5	20	98	428	694	3854	794	2530	199	1064	701	71
44.1	0.2401	2.16461	0.656046	-2.55173		40	29	128	407	717	3241	782	2482	381	1001	670	101
44.15	0.2404	2.47746	0.788989	-3.19069		21	12	125	357	642	3474	842	2545	95	1041	679	105
44.2	0.2407	2.28152	0.613719	-1.91034		26	48	104	399	599	3175	752	2393	158	873	621	89
44.25	0.241	2.32677	0.690885	-2.35855		43	29	88	347	612	3142	789	2365	107	675	580	121
44.3	0.2413	2.39813	0.859068	-1.96386		20	46	120	403	774	3607	841	2498	284	818	446	57
44.35	0.2416	2.44917	0.845781	-2.26558		41	31	134	389	696	3459	769	2166	70	947	652	44
44.4	0.2419	2.28787	0.761341	-2.55527		35	30	145	390	827	3806	849	2808	295	1151	792	92
44.45	0.2422	2.28553	0.727457	-2.60347		22	28	166	409	783	3719	900	3093	203	1245	802	125
44.5	0.2425	2.29535	0.688005	-2.36966		51	36	128	357	766	3822	721	2810	291	996	656	112
44.55	0.2431	2.27114	0.659124	-2.66879		29	25	103	342	697	3494	914	2998	273	1236	792	106
44.6	0.2434	2.42422	0.870061	-2.99277		23	15	107	408	714	3378	826	2361	292	920	490	55
44.65	0.2437	2.38618	0.777599	-3.4666		41	10	109	316	697	3482	700	2680	295	942	652	100
44.7	0.244	2.54887	0.9178	-2.382		11	28	130	356	759	3878	768	2697	177	978	417	96
44.75	0.2443	2.39338	0.74603	-2.63762		19	23	110	375	678	3521	800	2636	166	967	1035	81
44.8	0.2446	2.41385	0.411968	-2.15512		19	36	105	353	469	3472	731	1951	349	963	609	67
44.85	0.2449	2.47365	0.59742	-2.51052		15	24	104	340	537	3506	701	2187	237	1067	507	94
44.9	0.2455	2.36578	0.344327	-2.45202		30	26	87	382	426	3216	646	2107	319	739	599	84
44.95	0.2458	2.2759	0.384718	-1.84887		62	48	93	357	448	2969	672	2364	125	911	453	60
45	0.2461	2.28653	0.452375	-2.20842		47	39	93	373	558	3493	749	2574	278	1101	531	103
45.05	0.2464	2.16863	0.622731	-1.92702		53	51	112	363	653	3064	725	2384	203	1110	429	93
45.1	0.2467	2.22577	0.500923	-2.33919		41	34	80	328	582	3266	788	2344	344	1243	775	87
45.15	0.247	2.38695	0.803817	-2.25218		12	33	104	339	701	3414	708	2315	159	1211	815	106
45.2	0.2473	2.38309	0.643881	-2.80694		38	19	101	361	599	3410	759	2281	211	1033	736	63
45.25	0.2476	2.42335	0.480143	-1.92153		17	48	126	340	530	3700	734	2369	243	1269	539	78
45.3	0.2479	2.45489	0.821761	-2.85172		24	18	101	321	709	3630	779	2520	208	1007	507	112
45.35	0.2482	2.45534	0.855217	-2.94027		43	16	122	323	712	3527	805	2596	72	1137	613	83
45.4	0.2485	2.48429	0.862368	-2.84662		5	16	111	391	653	3306	782	2470	156	1210	691	102
45.45	0.2488	2.38613	0.565978	-3.05167		37	16	127	381	596	3679	797	2191	247	1280	731	89
45.5	0.2491	2.29148	0.501384	-2.6047		58	27	78	344	603	3612	769	6718	153	1136	879	78
45.55	0.2494	2.41136	0.566268	-2.69706		23	22	124	362	575	3639	712	2573	205	1208	622	109
45.6	0.2497	2.37501	0.50335	-2.2749		15	33	104	351	531	3451	776	2698	291	1142	611	85
45.65	0.25035	2.44115	0.470791	-2.9136		38	18	107	370	531	3809	828	1715	305	1008	831	89
45.7	0.2507	2.46957	0.521381	-2.59302		38	25	97	366	563	3950	693	1934	238	996	742	110
45.75	0.25105	2.51044	0.574395	-2.90775		18	17	122	354	553	3833	850	3249	162	1178	703	80
45.8	0.2514	2.37207	0.530886	-2.00178		33	46	89	372	579	3650	837	2321	316	1055	535	66
45.85	0.25175	2.64874	0.601776	-3.10992		60	13	79	361	532	4120	755	2034	127	979	538	75
45.9	0.2521	2.5313	0.545847	-3.06687		50	15	97	356	556	4049	854	2026	477	1201	366	59
45.95	0.2528	2.48225	0.51972	-2.64962		26	24	96	391	571	4064	840	2287	308	1061	725	95
46	0.25315	2.66558	0.799783	-2.04727		18	38	118	377	655	4232	951	2126	34	1324	788	70
46.05	0.2535	2.46607	0.528263	-2.7365		41	23	82	398	602	4180	878	2130	350	1342	891	66
46.1	0.25385	2.5584	0.706383	-2.9156		28	17	108	424	636	4053	850	2241	242	1215	547	53
46.15	0.2542	2.48223	0.497073	-3.18512		43	15	127	362	596	4339	834	2033	347	1293	842	105
46.2	0.25455	2.49187	0.473783	-2.42906		28	31	85	363	565	4251	820	3607	211	1161	876	88
46.25	0.2549	2.42198	0.509253	-2.81516		59	23	120	321	639	4327	946	2664	350	1293	630	99
46.3	0.25525	2.43095	0.531202	-2.35608		50	36	131	405	646	4318	838	2409	275	971	627	100
46.35	0.2556	2.51719	0.570808	-2.1758		42	39	93	297	608	4258	862	2416	182	1124	686	79
46.4	0.25595	2.45592	0.62544	-1.96533		25	50	85	348	667	4160	819	2713	303	923	697	96
46.45	0.2563	2.27279	0.565415	-2.45699		75	37	118	396	760	4191	863	2454	288	1342	948	131
46.5	0.25665	2.44789	0.612991	-2.44572		49	30	131	375	639	4003	803	2236	254	1005	538	65
46.55	0.257	2.39652	0.561491	-3.33033		51	14	153	358	686	4298	895	2534	318	1348	949	121
46.6	0.25735	2.40409	0.483838	-2.29195		22	39	123	413	626	4271	858	2131	402	1053	944	128
46.65	0.2577	2.48687	0.468083	-2.50145		40	29	103	346	565	4254	918	2370	344	772	657	102
46.7	0.25805	2.62572	0.579801	-1.9189		31	48	127	370	584	4518	774	2375	193	1082	682	31
46.75	0.2584	2.46601	0.379604	-2.03771		35	51	136	392	572	4608	861	2319	233	1198	971	95
46.8	0.25875	2.3753	0.473288	-2.36468		48	37	142	388	632	4234	840	2664	339	996	762	92
46.85	0.2591	2.57051	0.616204	-2.21374		15	36	103	361	610	4306	887	2538	299	1076	562	76
46.9	0.25945	2.61427	0.593925	-2.47506		9	25	108	386	538	4057	796	2843	305	948	349	101
46.95	0.2598	2.40428	0.33104	-2.21038		50	43	85	376	546	4341	878	2335	386	1200	939	91
47	0.26015	2.61673	0.596039	-1.6597		10	59	78	386	563	4247	880	2499	129	967	885	77
47.05	0.2605	2.58286	0.628542	-2.5644		21	25	144	343	609	4299	819	2232	216	802	930	69
47.1	0.26085	2.52098	0.55802	-2.50337		27	28	98	348	598	4258	827	2183	341	1055	1010	60
47.15	0.2612	2.53978	0.626897	-2.26047		24	37	108	306	664	4497	838	2177	200	1092	1063	107
47.2	0.26155	2.50683	0.640325	-2.3478		54	33	103	307	655	4235	826	2247	196	829	684	89
47.25	0.2619	2.39614	0.471561	-2.19329		40	41	102	367	589	4036	738	2035	180	1276	1041	116
47.3	0.26225	2.42765	0.537035	-2.29927		36	38	139	360	648	4292	832	2636	405	1010	797	64
47.35	0.2626	2.43883	0.588747	-2.61719		62	28	132	386	691	4395	860	1970	266	1058	753	105
47.4	0.26295	2.76688	0.6267	-2.99382		31	14	91	373	523	4446	714	1701	305	1183	336	45
47.45	0.2633	2.33358	0.337316	-2.20227		57	43	102	402	545	4012	825	1976	265	1101	964	119
47.5	0.26365	2.45769	0.632564	-2.90517		31	18	67	406	619	3840	816	1949	337	1139	772	94
47.55	0.264	2.52486	0.602127	-1.8897		15	48	100	334	580	3967	768	2056	322	922	753	54
47.6	0.265	2.19447	0.395094	-2.18407		73	43	97	376	567	3428	843	2196	304	1207	898	71
47.65	0.266	2.39673	0.517066	-2.54147		45	27	93	342	575	3767	811	1965	356	1100	777	65
47.7	0.267	2.38752	0.555215	-2.34208		26	32	111	355	580	3624	798	1976	276	1014	692	88
47.75	0.268	2.51981	0.641403	-2.52212		30	26	110	338	615	4024	822	1870	238	1095	784	59
47.8	0.27	2.45315	0.467941	-2.24191		58	37	83	349	556	4048	811	2224	273	997	617	75
47.85	0.271	2.36469	0.452304	-2.59222		48	26	102	351	546	3696	717	2200	406	935	544	105
47.9	0.272	2.59069	0.641748	-2.10979		31	36	86	327	564	3960	769	1892	166	914	631	48
47.95	0.274	2.35548	0.425918	-2.28213		39	37	149	371	555	3822	780	2172	354	1074	716	66
48	0.275	2.48248	0.372041	-2.43132		35	32	105	385	528	4357	727	2051	457	1143	854	78
48.05	0.276	2.45595	0.503688	-3.03129		38	17	112	379	583	4107	803	1901	279	1425	812	113
48.1	0.277	2.38466	0.545095	-2.23786		35	36	109	363	582	3663	800	1996	185	1048	643	103
48.15	0.278	2.44162	0.514735	-2.31086		31	31	83	319	523	3592	848	2412	262	1086	530	59
48.2	0.279	2.45956	0.471444	-2.25024		21	34	95	355	517	3775	724	2345	202	991	774	103
48.25	0.28	2.4434	0.662513	-2.52828		43	26	101	374	632	3751	823	2294	126	1014	732	81
48.3	0.281	2.42512	0.646476	-2.33953		20	31	86	343	614	3636	849	2174	243	1109	728	83
48.35	0.282	2.5324	0.463935	-2.02097		15	42	95	353	504	3988	681	2203	277	1076	636	85
48.4	0.283	2.36885	0.31271	-2.01716		51	47	113	335	483	3775	813	1832	165	1209	601	128
48.45	0.284	2.36126	0.403614	-2.30645		46	33	92	313	496	3513	719	1853	358	1020	575	82
48.5	0.28495	2.51057	0.568653	-2.07976		36	38	97	371	537	3744	725	1907	181	1253	310	65
48.55	0.28685	2.37152	0.459367	-2.19091		22	38	117	358	538	3641	745	2018	221	1108	969	97
48.6	0.2878	2.37163	0.470836	-1.94297		47	51	110	367	570	3814	740	1893	263	1120	619	77
48.65	0.28875	2.45247	0.608626	-3.56747		46	9	114	368	586	3704	855	2098	196	1197	605	115
48.7	0.2897	2.43446	0.671952	-2.06967		11	41	127	328	636	3706	770	1876	339	1023	818	76
48.75	0.29065	2.36736	0.626837	-2.31281		40	33	103	372	624	3557	845	2057	229	973	556	78
48.8	0.2916	2.30579	0.626281	-2.58021		28	26	101	367	642	3443	870	1953	215	1185	869	119
48.85	0.29255	2.3608	0.578359	-3.60961		47	9	119	352	593	3525	748	1943	259	1126	890	131
48.9	0.2935	2.32008	0.47237	-2.66501		50	23	93	359	530	3363	745	2059	231	1232	546	104
48.95	0.29445	2.10862	0.29705	-2.2438		60	42	118	422	533	3262	861	2085	402	1431	688	96
49	0.2954	2.3925	0.557389	-2.12117		50	39	118	319	568	3559	863	1996	65	1376	690	89
49.05	0.29635	2.29051	0.589593	-2.06716		23	40	78	393	570	3123	864	2154	157	1265	662	81
49.1	0.2973	2.29974	0.6609	-2.25846		40	34	97	368	630	3244	824	2049	117	1058	658	103
49.15	0.29825	2.252	0.452963	-2.9365		67	20	124	353	593	3584	793	1899	407	1319	699	117
49.2	0.2992	2.37827	0.685175	-2.2034		23	31	95	370	557	3028	746	1920	290	1030	552	24
49.25	0.30015	2.26578	0.532382	-2.06016		23	44	116	414	588	3328	838	1881	333	980	707	83
49.3	0.3011	2.39917	0.626697	-2.46278		36	29	114	367	637	3749	845	2231	153	1324	646	94
49.35	0.30205	2.20112	0.665877	-2.30454		27	36	115	404	702	3259	747	2069	209	1069	1054	129
49.4	0.303	2.37172	0.710784	-2.48643		25	28	96	391	685	3606	880	2201	259	1171	838	66
49.45	0.304	2.37898	0.626418	-2.91293		35	18	102	400	620	3577	845	2229	288	1020	540	103
49.5	0.305	2.29408	0.586733	-2.58295		17	25	107	421	595	3281	888	2181	181	1257	844	124
49.55	0.306	2.19991	0.705988	-3.11329		35	14	111	382	638	2842	676	1941	267	1202	800	75
49.6	0.307	2.26582	0.606139	-2.88429		28	20	141	323	656	3449	842	1862	345	1191	1058	112
49.65	0.308	2.23562	0.58236	-3.5671		68	10	138	386	634	3312	819	2059	384	1128	824	85
49.7	0.309	2.30667	0.787073	-1.94151		29	45	95	380	689	3149	851	1721	134	1118	585	69
49.75	0.31	2.33388	0.604643	-1.83099		16	52	107	394	594	3348	725	1594	343	1077	602	76
49.8	0.311	2.34306	0.586081	-1.7165		51	59	132	344	590	3419	768	2234	75	1107	833	48
49.85	0.312	2.42947	0.64921	-2.796		69	20	120	324	627	3719	741	1919	237	1115	812	40
49.9	0.313	2.34938	0.611883	-2.36858		53	33	113	302	650	3694	740	1852	253	1163	951	67
49.95	0.314	2.18555	0.401963	-2.07534		74	55	137	285	655	3898	894	1973	499	1160	1000	121
50	0.315	2.22238	0.436527	-2.54915		42	30	146	342	594	3543	870	2165	408	1108	977	93
50.05	0.316	2.61325	0.679256	-3.07476		30	13	132	318	555	3839	819	1726	124	1023	691	57
50.1	0.317	2.19585	0.598474	-2.26303		60	41	109	363	717	3542	819	1941	293	1261	799	121
50.15	0.318	2.42954	0.574883	-1.53615		37	74	122	321	611	3904	834	1864	154	940	698	68
50.2	0.319	2.38577	0.514874	-2.73819		50	23	140	350	595	3864	906	2103	157	1181	866	103
50.25	0.32	2.34144	0.61511	-2.20478		48	40	135	358	671	3771	750	1905	323	1117	564	76
50.3	0.321	2.4261	0.55651	-2.68981		47	23	137	354	591	3833	734	1918	263	1142	892	51
50.35	0.322	2.40926	0.562257	-2.37899		54	33	109	351	625	3963	734	1987	362	940	743	67
50.4	0.323	2.36539	0.539355	-2.1315		28	42	109	305	607	3769	772	1998	266	1035	979	104
50.45	0.32395	2.3431	0.633694	-2.36351		44	34	123	323	681	3763	822	2343	233	960	1021	74
50.5	0.3249	2.57827	0.718839	-2.72391		22	22	111	291	688	4417	698	2242	361	965	986	79
50.55	0.32585	2.38241	0.668168	-2.27919		26	36	135	299	686	3809	804	2070	283	1103	784	89
50.6	0.3268	2.42129	0.689003	-1.7794		40	56	108	316	661	3737	806	2148	89	1082	567	100
50.65	0.32775	2.26046	0.564816	-1.9561		53	50	112	340	622	3390	770	1976	243	969	506	99
50.7	0.3287	2.40786	0.843046	-2.79731		57	19	126	366	724	3462	780	2081	83	1221	370	110
50.75	0.32965	2.25763	0.506105	-2.18109		47	42	148	345	617	3556	767	2152	249	1016	767	99
50.8	0.3306	2.31331	0.536666	-2.4127		58	32	126	355	611	3611	776	2298	186	1055	775	87
50.85	0.33155	2.27441	0.719502	-2.6695		34	22	125	322	652	3087	793	1920	297	1250	876	35
50.9	0.3325	2.23277	0.690375	-2.5253		31	25	125	332	623	2913	792	2109	181	1197	817	50
50.95	0.33345	2.42891	0.66522	-3.07585		31	14	108	344	590	3442	698	1964	223	1008	734	82
51	0.3344	2.22386	0.564156	-2.44446		53	27	123	308	547	2876	673	1955	261	982	666	43
51.05	0.33535	2.12967	0.663685	-3.34365		63	12	118	346	660	2859	794	2256	276	1202	602	114
51.1	0.3363	2.10175	0.735008	-2.5903		34	26	124	353	723	2836	765	2158	223	1098	681	138
51.15	0.33725	2.3766	0.447355	-2.25813		48	26	102	386	389	2678	544	1283	92	705	732	33
51.2	0.33915	2.2195	0.437324	-3.34002		50	10	112	363	437	2597	688	1660	397	1178	450	46
51.25	0.3401	2.43107	0.527311	-3.08135		34	12	74	380	443	2973	707	1635	257	814	716	39
51.3	0.34105	2.2279	0.471916	-1.80686		31	51	108	359	498	2883	651	1823	168	903	761	67
51.35	0.342	2.16864	0.619524	-2.6666		64	23	106	360	615	2895	750	1847	182	1303	731	72
51.4	0.34305	2.07936	0.547533	-2.33628		43	34	113	345	608	2813	799	1919	323	1152	739	87
51.45	0.3441	2.29932	0.529303	-2.41918		27	26	116	360	496	2912	781	1597	171	1025	663	63
51.5	0.34515	2.31288	0.68461	-2.72947		10	18	106	328	547	2787	678	1611	318	1051	743	75
51.55	0.3462	2.24205	0.532656	-2.33053		51	29	100	331	508	2807	677	1454	364	1166	435	39
51.6	0.34725	2.23274	0.440617	-2.43034		33	26	97	344	459	2755	700	1707	254	1076	719	52
51.65	0.3483	2.26986	0.737302	-2.28138		15	28	128	320	573	2653	660	1709	196	917	566	60
51.7	0.34935	2.07467	0.553765	-2.38886		42	29	104	345	550	2517	650	1573	387	1136	516	71
51.75	0.3504	2.12962	0.647642	-2.77825		37	20	135	421	615	2707	740	1638	297	1172	663	63
51.8	0.35145	2.23434	0.707532	-1.82685		33	46	98	416	580	2670	678	1506	72	1117	582	65
51.85	0.3525	2.18907	0.664124	-3.23109		60	12	127	383	590	2711	737	1619	178	1303	446	89
51.9	0.35355	2.03438	0.485612	-1.93742		32	50	99	344	564	2654	707	1761	329	1042	769	114
51.95	0.3546	2.21771	0.689914	-2.26152		51	30	136	352	574	2645	834	1550	54	1073	639	61
52	0.35775	2.16142	0.52336	-2.63869		48	21	82	357	496	2552	668	1571	152	1154	990	61
52.05	0.3588	2.34895	0.835455	-2.36507		41	22	139	325	540	2453	742	1767	16	1008	745	32
52.1	0.35985	2.23565	0.539837	-2.39402		42	25	101	346	470	2562	674	1519	49	1296	740	84
52.15	0.3609	2.18318	0.687507	-2.19415		27	32	111	345	571	2548	716	1859	90	1160	733	64
52.2	0.36195	2.183	0.533652	-2.28881		23	33	119	329	555	2888	723	1747	286	1249	889	74
52.25	0.363	2.09214	0.520674	-2.31064		40	31	133	278	526	2532	786	1913	251	1171	643	50
52.3	0.36405	2.10753	0.708847	-2.95321		54	17	94	347	662	2681	750	1652	295	1188	640	97
52.35	0.3651	2.07423	0.773839	-2.56793		61	26	122	301	735	2698	775	1619	350	1122	794	51
52.4	0.36615	2.10855	0.551038	-1.92189		58	49	114	365	581	2758	725	1868	286	1205	899	25
52.45	0.3672	2.04541	0.656152	-2.06041		30	39	116	318	590	2367	772	2002	308	742	558	57
52.5	0.36825	2.20499	0.707313	-2.73175		43	19	117	353	592	2647	671	1735	450	1152	520	23
52.55	0.3693	2.05787	0.506349	-2.52217		75	27	125	323	558	2633	666	2079	294	1219	836	42
52.6	0.37035	2.09094	0.628717	-2.30081		59	32	125	346	599	2585	672	1774	230	1109	285	103
52.65	0.3714	2.02954	0.530669	-2.0289		30	43	118	315	556	2489	751	1872	287	1207	572	81
52.7	0.37245	2.10745	0.650884	-3.25384		45	11	97	364	546	2343	754	1882	103	1280	667	102
52.75	0.3735	1.83993	0.553811	-2.47183		32	28	137	391	577	2088	689	2259	290	1121	593	102
52.8	0.37455	1.87612	0.517898	-2.07237		65	42	114	307	560	2178	678	1932	232	1140	604	78
52.85	0.3756	1.94612	0.541368	-2.44918		36	29	127	325	577	2351	833	2238	257	1258	720	81
52.9	0.37665	2.07748	0.685404	-2.07337		27	41	118	333	647	2603	749	1926	233	932	641	98
52.95	0.3777	2.00281	0.524949	-2.26709		25	35	152	337	571	2503	744	1844	338	1122	883	75
53	0.37875	1.8725	0.748373	-2.10207		32	44	137	369	761	2342	763	2212	228	1249	916	85
53.05	0.3798	2.16205	0.644422	-3.13627		29	13	102	383	570	2600	779	1703	453	1065	636	58
53.1	0.38085	2.05423	0.663397	-2.48208		27	26	122	355	604	2427	705	1626	172	1303	659	109
53.15	0.3819	2.06182	0.698107	-2.60735		39	23	102	360	627	2452	686	1672	239	1039	647	91
53.2	0.38295	2.22265	0.585753	-2.4706		38	24	72	314	510	2621	717	1640	179	1026	576	80
53.25	0.384	1.96211	0.544547	-2.23786		60	38	144	372	614	2534	800	1608	270	1347	700	67
53.3	0.3852	1.8838	0.477652	-1.99982		65	45	153	362	536	2187	737	1646	82	1331	763	95
53.35	0.3864	2.04241	0.570181	-2.46192		35	27	108	337	560	2441	684	1581	318	1194	741	71
53.4	0.3888	1.98248	0.546953	-2.55726		39	24	147	351	535	2248	739	1653	297	1285	377	76
53.45	0.39	1.86599	0.61346	-2.02082		50	45	145	311	627	2194	713	1540	155	1201	967	85
53.5	0.3912	2.00069	0.668378	-2.47176		42	28	132	337	647	2452	706	1576	212	1184	1031	74
53.55	0.3924	1.85618	0.941557	-2.50497		20	23	112	338	722	1802	794	1778	178	1082	684	59
53.6	0.3936	1.80932	0.67521	-2.35094		57	34	143	342	701	2179	804	1952	188	1183	774	109
53.65	0.3948	1.92606	0.749334	-2.45404		32	26	132	329	640	2076	764	2157	95	1158	675	100
53.7	0.396	2.00351	0.693084	-3.16413		25	12	140	350	568	2106	782	1571	134	1383	1110	62
53.75	0.3972	1.82678	0.491232	-2.37701		53	33	113	357	581	2209	738	1363	309	1326	827	132
53.8	0.3984	1.89289	0.517009	-2.11308		40	40	135	307	555	2197	759	1504	171	1208	1006	90
53.85	0.3996	2.02181	0.716449	-2.80828		46	18	132	348	611	2254	846	1671	95	1046	623	109
53.9	0.4008	2.02756	0.617735	-2.46315		42	27	106	355	588	2408	737	1634	127	1283	1011	86
53.95	0.402	2.04489	0.59649	-2.49959		43	27	136	368	597	2541	738	1304	218	1159	696	107
54	0.4032	1.78303	0.530536	-2.34679		31	30	114	331	533	1865	750	1516	293	1229	652	97
54.05	0.4044	1.88755	0.591699	-1.99499		29	42	136	306	558	2039	772	1324	169	1313	513	112
54.1	0.4056	1.82832	0.46392	-2.21566		42	38	135	341	554	2168	854	1537	296	1145	790	103
54.15	0.4068	1.9295	0.523098	-2.15648		55	38	115	294	554	2261	808	1409	282	1235	658	68
54.2	0.408	1.96179	0.761457	-2.39858		52	28	124	390	660	2192	759	1424	123	1105	792	62
54.25	0.4093	1.88528	0.534537	-1.98022		46	44	145	362	544	2100	854	1305	66	1332	907	102
54.3	0.4106	1.76729	0.70078	-2.58046		44	23	127	376	612	1778	711	1371	202	1059	684	82
54.35	0.4119	1.93014	0.605648	-2.43205		51	28	139	404	584	2196	710	1540	164	1047	779	73
54.4	0.4145	1.93461	0.499315	-2.30621		39	28	121	390	463	1945	667	1393	169	1029	599	54
54.45	0.4158	1.96692	0.443711	-1.96446		30	44	148	366	489	2243	690	1600	128	1210	700	97
54.5	0.4171	1.91362	0.365656	-1.88212		52	45	91	378	426	2003	667	2361	80	1131	567	80
54.55	0.4184	1.98032	0.407691	-1.73752		36	57	133	365	487	2347	676	1483	127	1269	968	75
54.6	0.4197	1.98773	0.412267	-2.35384		30	29	102	400	461	2228	692	1605	215	1260	785	76
54.65	0.421	2.10426	0.474255	-2.19557		40	32	110	386	462	2358	691	1488	201	1194	575	38
54.7	0.4223	2.01655	0.431368	-2.7513		26	18	110	365	434	2118	688	1380	182	1099	801	96
54.75	0.4236	2.0223	0.444342	-2.27201		25	32	143	342	484	2345	774	1323	268	1072	711	86
54.8	0.4249	2.04974	0.433921	-1.95205		56	46	99	316	500	2516	708	1470	291	955	661	69
54.85	0.4262	2.06695	0.544838	-2.33977		33	29	127	378	519	2378	846	1387	243	1004	792	43
54.9	0.4275	1.98777	0.645988	-2.13352		31	36	161	331	580	2219	753	1409	79	1134	732	117
54.95	0.4301	1.92315	0.637425	-2.1729		38	39	119	344	648	2344	797	1543	280	1183	994	70
55	0.4314	2.14562	0.697838	-3.66253		20	7	84	325	548	2331	785	1525	332	1170	981	76
55.05	0.4327	1.99864	0.585541	-2.8212		39	18	116	320	543	2231	761	1691	372	1293	474	63
55.1	0.434	2.06917	0.5946	-3.00467		41	14	107	302	512	2237	779	1241	275	1447	673	47
55.15	0.43515	2.1283	0.575236	-2.28235		33	31	116	374	540	2552	780	1286	213	1056	364	123
55.2	0.4363	1.83125	0.379598	-1.80163		25	56	132	394	496	2118	813	1178	395	1172	739	93
55.25	0.43745	2.04968	0.291586	-2.26427		43	34	113	409	438	2541	750	1403	250	1071	827	86
55.3	0.4386	2.03052	0.533078	-2.66374		28	22	140	317	538	2405	829	1459	194	1109	910	117
55.35	0.43975	1.92595	0.369073	-2.31917		59	34	106	334	500	2372	821	1355	244	1360	726	129
55.4	0.4409	2.07632	0.370507	-1.9974		41	40	111	351	427	2351	781	1246	105	1046	816	77
55.45	0.44205	2.03383	0.472324	-2.41008		29	28	128	347	500	2383	753	1294	299	1174	844	68
55.5	0.4432	2.06619	0.483537	-2.34378		40	30	114	336	507	2468	755	1327	215	1202	568	103
55.55	0.44435	2.02947	0.695095	-2.90904		22	16	116	356	588	2233	854	1415	334	1298	463	88
55.6	0.4455	2.03191	0.565847	-2.26021		24	33	128	352	557	2413	783	1376	174	1333	686	122
55.65	0.44665	1.93351	0.436298	-2.10396		60	41	124	333	520	2324	773	1522	184	1176	537	124
55.7	0.44895	1.94444	0.35809	-2.17638		55	41	90	341	517	2526	941	1669	269	1313	846	117
55.75	0.4501	2.08587	0.64103	-2.55764		24	22	71	370	539	2286	788	1461	292	1015	1001	47
55.8	0.45125	1.8798	0.5665	-2.19532		40	35	139	351	554	2060	778	1294	211	1013	670	83
55.85	0.4524	1.7461	0.575276	-2.07056		38	42	128	384	592	1909	811	1309	238	1201	736	94
55.9	0.45355	2.00894	0.509977	-2.41079		29	27	121	385	501	2243	671	1389	332	1110	558	70
55.95	0.4547	1.9419	0.31102	-2.04488		48	42	81	386	443	2263	705	1372	357	1175	889	60
56	0.45585	1.96926	0.395785	-2.50123		27	25	87	404	453	2185	726	1372	239	1237	779	120
56.05	0.457	2.04838	0.428032	-2.43636		37	26	103	408	456	2305	712	1461	244	1258	398	88
56.1	0.45805	2.06451	0.457332	-2.20651		28	37	114	372	531	2649	824	1543	316	1269	717	92
56.15	0.4591	2.01289	0.493288	-2.26853		35	35	107	343	554	2532	794	1949	255	1053	772	111
56.2	0.46015	2.11597	0.510112	-2.725		43	22	119	372	559	2785	867	1707	204	1203	830	104
56.25	0.4612	2.18337	0.566846	-3.86793		37	6	82	368	506	2548	742	1889	255	1163	709	123
56.3	0.46225	2.12777	0.566468	-2.90842		45	17	104	342	549	2616	765	1866	124	1095	884	125
56.35	0.4633	2.12771	0.504845	-3.92399		45	6	144	355	503	2549	744	1655	346	950	644	133
56.4	0.4654	2.28696	0.541043	-2.66248		34	21	143	315	517	2963	786	1396	155	1192	709	78
56.45	0.46645	2.38131	0.570307	-2.6968		23	17	127	270	446	2728	739	1583	57	1087	673	83
56.5	0.4675	2.05861	0.394508	-2.01181		53	43	105	262	477	2519	769	1716	271	995	650	70
56.55	0.46855	2.13769	0.643327	-2.69422		41	20	118	308	563	2509	758	1382	171	1219	583	84
56.6	0.4696	1.98811	0.529624	-2.3989		44	30	144	346	561	2412	760	1511	235	1130	715	87
56.65	0.47065	2.0476	0.628266	-2.16727		47	35	112	294	573	2369	765	1442	228	921	508	77
56.7	0.4717	1.93685	0.747561	-2.78741		49	17	124	333	583	1915	721	1480	215	898	604	41
56.75	0.47275	2.21299	0.559379	-2.36378		19	25	104	331	465	2430	637	1583	253	1085	694	35
56.8	0.4738	2.18337	0.70916	-2.17773		15	32	130	330	574	2507	776	1399	292	922	692	43
56.85	0.47485	2.06682	0.675644	-2.48462		40	26	148	336	613	2464	710	1556	258	939	390	104
56.9	0.4759	1.98957	0.498482	-1.96589		65	41	143	395	482	2141	613	1177	205	762	687	33
56.95	0.47695	2.02362	0.651337	-2.23712		41	29	98	322	521	2055	701	1360	139	948	477	67
57	0.478	2.10039	0.709347	-2.55832		20	20	119	378	525	2110	742	2048	222	933	439	32
57.05	0.47915	1.97692	0.730754	-2.43086		37	23	136	416	543	1888	688	1504	95	657	493	65
57.1	0.4803	2.0401	0.53906	-1.48958		42	53	101	398	403	1808	497	1087	55	712	607	34
57.15	0.48145	2.10146	0.306352	-2.28775		50	26	84	414	348	2095	517	1138	243	871	556	35
57.2	0.4826	1.91744	0.386489	-2.01386		40	37	131	318	408	1886	614	1165	248	745	714	46
57.25	0.48375	2.01859	0.320755	-2.1343		56	34	98	319	396	2163	646	1079	243	975	855	44
57.3	0.4849	1.96356	0.276291	-2.13821		67	38	122	388	425	2297	662	1261	163	1223	749	86
57.35	0.48605	2.14442	0.264342	-2.81527		64	20	107	354	435	2851	780	1597	283	1143	836	95
57.4	0.4872	2.18486	0.342353	-2.1448		45	37	137	385	445	2809	652	1598	179	1040	931	50
57.45	0.48835	2.10523	0.41609	-2.4919		44	25	95	398	458	2480	657	1538	269	1038	586	74
57.5	0.4895	2.10901	0.43611	-3.13883		43	13	100	347	464	2472	687	2369	319	1085	800	53
57.55	0.49065	2.01994	0.37593	-2.38244		51	31	150	410	489	2531	723	3230	183	1020	870	45
57.6	0.4918	1.99263	0.43992	-2.58537		48	25	100	338	515	2433	784	3800	188	872	851	84
57.65	0.49295	2.10284	0.362225	-2.3941		47	31	120	328	488	2782	763	3352	246	1083	685	65
57.7	0.4941	1.99224	0.472417	-2.83569		46	21	115	347	574	2624	816	2782	259	1080	958	125
57.75	0.49525	2.13853	0.399718	-2.56511		38	23	109	395	446	2538	731	1762	256	1185	683	45
57.8	0.4964	2.23529	0.68855	-2.70561		27	19	108	340	566	2658	751	2037	197	1336	520	47
57.85	0.49755	1.99572	0.469014	-2.03651		38	44	96	359	539	2481	692	1634	296	1414	666	89
57.9	0.4987	2.23702	0.38043	-2.67121		30	20	150	349	423	2708	739	1446	237	982	779	49
57.95	0.49985	2.28625	-0.0170318	-1.84438		54	46	131	382	286	2862	577	1328	341	1012	569	24
58	0.501	2.03206	0.458055	-2.12643		48	39	126	358	517	2495	678	1952	204	1174	610	71
58.05	0.50215	2.03641	0.616726	-2.36419		20	34	132	373	670	2771	875	2434	386	1072	822	111
58.1	0.5033	1.95092	0.442185	-2.64125		32	24	123	385	524	2369	824	1899	358	1239	640	106
58.15	0.50445	1.9353	0.54374	-2.80265		45	20	137	355	568	2284	844	2041	380	1005	714	62
58.2	0.5056	1.91932	0.617825	-2.6683		44	23	103	364	615	2260	757	1925	193	1121	856	124
58.25	0.50675	2.21753	0.684523	-2.4608		24	22	124	350	511	2367	677	1887	62	965	555	73
58.3	0.5079	1.74764	0.548997	-2.608		46	24	115	390	564	1870	715	1835	346	1128	635	84
58.35	0.50905	1.96181	0.4231	-2.47612		48	25	95	372	454	2115	692	1690	232	1026	586	72
58.4	0.5102	2.07461	0.519407	-2.09842		24	34	98	372	466	2207	706	1795	278	1094	296	59
58.45	0.51135	1.84716	0.357073	-2.09706		66	44	137	392	512	2272	674	1641	211	1280	730	113
58.5	0.5125	2.06035	0.497947	-2.95882		25	14	83	363	444	2118	769	1425	204	1351	766	65
58.55	0.51365	2.39397	0.624529	-2.62448		24	17	132	375	438	2570	642	1442	134	1067	485	19
58.6	0.5148	2.00791	0.258707	-2.18224		29	31	117	382	356	2047	659	1231	241	1044	676	46
58.65	0.51595	2.06286	0.430287	-1.80585		54	42	122	376	393	2011	581	1808	120	951	197	40
58.7	0.5171	2.20238	0.448358	-2.5421		30	19	96	355	378	2184	673	1382	142	1036	406	44
58.75	0.51825	2.01121	0.317161	-1.82824		46	44	78	385	376	2046	553	1337	207	795	529	59
58.8	0.5194	1.87568	0.0504924	-2.23255		35	31	95	362	304	1886	660	1426	278	1044	524	111
58.85	0.52055	1.94052	0.446922	-2.92496		25	15	129	384	437	1946	664	1628	277	1093	571	77
58.9	0.5217	1.99185	0.46667	-1.93123		30	36	89	383	396	1820	638	1276	110	1120	287	72
58.95	0.52285	1.80729	0.220206	-1.50634		57	66	87	450	371	1814	639	1420	128	895	566	83
59	0.524	1.92672	0.378031	-2.47041		21	23	108	392	397	1868	630	1572	182	1091	414	133
59.05	0.5251	1.89416	0.307487	-1.97234		15	40	100	395	391	1911	640	1732	276	1025	592	97
59.1	0.5262	2.13462	0.241862	-1.70405		19	41	63	390	287	1905	649	1761	41	1096	550	58
59.15	0.5273	2.06904	0.41353	-2.00189		31	36	79	428	403	2110	559	1957	62	1057	473	118
59.2	0.5284	2.14679	0.407599	-2.90399		20	14	83	410	384	2186	628	2315	260	1059	335	72
59.25	0.5295	2.14604	0.249076	-2.55125		16	20	97	375	329	2193	699	2068	158	1122	495	76
59.3	0.5306	2.19245	0.682848	-2.50611		10	19	100	399	461	2086	591	1932	72	1089	619	63
59.35	0.5317	1.96599	0.449335	-2.21536		45	33	102	405	474	2160	695	1748	163	1140	401	103
59.4	0.5328	1.80766	0.223142	-1.85108		33	48	122	389	382	1863	811	1823	99	1160	794	92
59.45	0.5339	1.85416	0.405379	-2.25194		26	31	82	347	442	1882	716	1974	167	1294	809	91
59.5	0.535	2.07141	0.438238	-3.78127		26	6	85	369	408	2089	697	1872	237	1307	670	98
59.55	0.5361	1.88207	0.391498	-2.16487		29	36	92	368	464	2060	746	2060	200	985	870	102
59.6	0.5372	2.04708	0.299968	-2.4257		30	30	133	351	458	2628	788	2177	325	1208	795	86
59.65	0.5383	1.99275	0.607764	-3.34348		52	11	145	319	572	2285	762	1752	323	1031	687	79
59.7	0.5394	1.87436	0.538972	-2.50188		41	26	121	317	544	2068	704	1668	407	1050	619	73
59.75	0.5405	2.09207	0.489197	-2.65864		54	21	101	291	489	2429	820	1493	246	1291	476	72
59.8	0.5416	2.09277	0.270176	-2.0174		51	47	133	312	463	2865	791	1975	287	1092	618	95
59.85	0.5427	2.06265	0.620552	-2.50501		25	22	100	336	501	2119	701	1660	94	1067	574	111
59.9	0.5449	2.11619	0.685703	-2.9818		15	13	112	310	509	2128	659	1628	84	1178	850	122
59.95	0.546	1.93246	0.380461	-2.7391		68	22	117	322	498	2351	723	1598	341	1273	665	110
60	0.5481	2.04353	0.391676	-2.28128		31	29	108	354	420	2191	663	1511	82	1077	640	153
60.05	0.54915	1.97367	0.280444	-2.18663		57	33	99	290	389	2115	723	1431	123	1005	584	125
60.1	0.5502	2.03941	0.48435	-2.73922		54	17	126	320	427	2022	708	1176	85	1143	401	106
60.15	0.55125	2.07273	0.460597	-2.99842		28	14	108	294	445	2231	715	1612	257	1096	842	71
60.2	0.5523	1.99106	0.512478	-2.04109		23	34	110	233	437	1917	720	1184	236	945	523	62
60.25	0.55335	1.98853	0.233763	-2.46872		40	24	90	259	358	2070	664	1771	322	963	739	60
60.3	0.5544	2.21632	0.403176	-2.50171		66	19	106	281	347	2127	695	1192	20	1081	889	55
60.35	0.55545	2.24893	0.231016	-2.41941		45	25	92	284	354	2663	670	1267	213	1072	635	71
60.4	0.55755	2.15458	0.334948	-1.77274		32	48	95	293	395	2437	624	1297	188	986	677	62
60.45	0.5586	2.10473	0.39016	-2.09706		26	36	70	306	433	2405	717	1372	269	1240	851	69
60.5	0.55965	2.20581	0.541868	-1.84515		15	42	120	262	457	2413	774	1115	86	1158	663	100
60.55	0.5607	2.0014	0.667211	-3.62667		29	8	141	243	586	2225	828	1518	371	1426	967	82
60.6	0.5628	2.01358	0.484251	-1.79964		36	54	139	267	530	2446	663	2174	311	980	351	102
60.65	0.56385	2.26525	0.63981	-3.64147		29	6	98	299	434	2205	693	1212	273	1158	760	21
60.7	0.5649	1.96789	0.344684	-2.10716		64	41	104	319	476	2413	769	1367	212	1080	768	117
60.75	0.56595	2.03439	0.295041	-1.9795		33	47	103	314	457	2602	725	1926	417	906	665	115
60.8	0.567	2.03805	0.419273	-1.92498		53	47	127	359	490	2473	739	1295	243	1004	628	62
60.85	0.5681	2.26907	0.469202	-2.03924		11	35	100	276	430	2601	761	1356	220	773	968	71
60.9	0.5692	1.94207	0.3995	-2.08967		37	39	121	293	470	2198	722	1205	245	1155	795	93
60.95	0.5703	2.05682	0.318343	-2.12269		27	33	113	346	379	2156	742	1383	161	964	634	67
61	0.5714	2.11667	0.317874	-1.72484		26	52	105	286	401	2423	762	2146	103	1116	745	69
61.05	0.5725	2.20047	0.349666	-2.30163		27	29	127	327	411	2616	659	1339	274	1203	702	49
61.1	0.5736	2.20033	0.370357	-1.87373		26	44	110	341	415	2587	685	1339	143	981	834	62
61.15	0.5747	1.97354	0.337018	-1.80305		22	48	106	342	408	2096	767	1377	212	1050	734	66
61.2	0.5758	2.00949	0.242304	-2.01752		48	43	140	372	412	2412	619	1466	274	966	979	52
61.25	0.5769	1.9495	0.198018	-2.37486		42	29	123	329	380	2190	708	1595	355	1276	892	45
61.3	0.578	2.05148	0.393248	-2.30138		36	30	111	305	444	2331	719	1326	248	1021	831	69
61.35	0.5791	2.02971	0.198346	-2.10191		65	43	116	335	429	2678	794	1104	345	1004	887	107
61.4	0.5802	2.17052	0.342858	-1.48918		66	73	140	340	456	2836	774	1117	152	964	606	58
61.45	0.5813	2.34671	0.563366	-1.90049		18	44	108	286	517	3076	807	1174	218	1223	860	50
61.5	0.5824	2.13832	0.572511	-2.28012		36	30	148	276	520	2489	811	1196	94	1166	662	101
61.55	0.5835	2.13726	0.714108	-2.14513		34	29	122	268	506	2100	784	1107	49	1126	627	52
61.6	0.5846	2.11825	0.605541	-2.61681		38	23	131	274	577	2619	826	1227	194	1334	1048	73
61.65	0.5857	2.30295	0.658896	-3.05873		29	12	144	282	494	2557	699	1230	196	878	589	50
61.7	0.5868	2.16298	0.489806	-1.98867		57	39	141	282	465	2478	768	1494	309	807	614	16
61.75	0.5879	1.99338	0.245235	-1.77915		47	49	122	310	371	2131	680	1258	252	1068	595	38
61.8	0.589	2.16099	0.301829	-2.26824		52	30	114	329	392	2516	653	1080	202	945	906	50
61.85	0.5902	2.19165	0.30578	-2.2671		50	29	129	321	380	2505	641	1044	260	830	400	70
61.9	0.5914	2.15133	0.167681	-2.07882		63	33	121	321	312	2268	549	1061	181	1019	639	29
61.95	0.5926	2.21587	0.485754	-3.11974		27	10	108	323	368	2076	555	1424	233	958	461	31
62	0.5938	1.95341	0.281781	-1.99081		27	44	121	382	427	2272	678	1423	336	1150	850	74
62.05	0.595	1.92048	0.374723	-1.85405		50	52	148	369	483	2266	732	1807	180	1186	853	48
62.1	0.5962	1.88338	0.481922	-1.69877		43	61	128	367	540	2193	743	1555	215	806	810	80
62.15	0.5974	2.09064	0.232213	-2.65089		55	23	146	336	411	2636	796	1412	228	894	989	94
62.2	0.5986	1.97451	0.308533	-1.8622		51	51	112	329	447	2365	737	1848	200	1094	658	79
62.25	0.5998	2.15979	0.202011	-1.52243		48	64	111	344	359	2543	685	1521	106	895	852	45
62.3	0.601	2.15603	0.234425	-1.7173		9	49	105	305	345	2357	742	1312	283	922	900	65
62.35	0.6022	2.12584	0.27318	-2.40453		49	29	109	314	422	2691	733	1507	250	1065	987	75
62.4	0.6034	2.01698	0.212026	-1.84355		52	53	124	336	414	2517	700	1265	234	989	837	97
62.45	0.6046	2.21585	0.519183	-2.36045		23	26	100	302	463	2526	773	1302	211	965	566	78
62.5	0.6058	2.2434	0.392641	-2.02066		36	41	109	299	458	2915	790	1392	280	1028	554	68
62.55	0.607	2.09101	0.34043	-1.96428		53	47	112	322	471	2712	829	1509	251	944	614	96
62.6	0.6082	2.16237	0.536244	-2.26614		47	31	124	329	511	2598	788	1466	120	971	785	61
62.65	0.6094	2.06298	0.518716	-2.26987		48	31	122	329	504	2361	751	1661	163	1030	627	57
62.7	0.6106	1.87683	0.443127	-1.91736		51	52	154	346	551	2311	759	1520	356	1337	627	62
62.75	0.6118	1.91792	0.681776	-1.80907		38	56	156	317	676	2327	874	1594	212	968	494	109
62.8	0.613	2.11489	0.612344	-2.36201		19	26	156	357	509	2287	687	1518	229	799	885	36
62.85	0.61415	2.1573	0.354414	-1.70838		40	53	127	326	417	2530	681	1272	121	986	747	55
62.9	0.6153	1.95719	0.275381	-2.09098		60	41	103	292	437	2349	686	1849	322	1170	846	58
62.95	0.61645	2.07009	0.487255	-2.22079		56	32	112	388	480	2337	662	1234	184	965	559	61
63	0.6176	2.31458	0.48543	-2.57744		32	18	104	336	385	2398	599	978	138	989	514	41
63.05	0.61875	2.19382	0.156138	-1.87262		56	43	132	371	327	2509	601	986	205	836	599	39
63.1	0.6199	2.05461	0.293705	-2.15882		36	34	126	392	395	2298	714	1549	171	1211	615	55
63.15	0.62105	2.18466	0.270489	-2.52094		71	23	123	417	375	2543	663	1281	221	988	363	56
63.2	0.6222	2.20734	0.153366	-2.53419		50	23	121	414	338	2636	685	1556	316	1011	577	35
63.25	0.62335	1.82016	0.229616	-2.25038		55	34	134	422	406	1992	736	1212	461	1079	551	61
63.3	0.6245	2.05444	0.490106	-3.33418		49	10	99	429	458	2189	752	1048	199	713	910	112
63.35	0.62565	2.41954	0.701516	-1.7544		20	35	94	466	408	2274	653	964	15	657	493	54
63.4	0.62795	2.16887	0.081906	-1.606		39	49	86	398	265	2136	528	902	174	846	524	33
63.45	0.6291	2.0372	0.0577948	-1.75192		57	46	113	344	281	2034	616	1152	204	637	550	41
63.5	0.63025	2.10216	0.115396	-2.07564		62	36	80	329	322	2348	677	1564	211	984	590	54
63.55	0.6314	2.01234	0.275573	-2.36918		49	25	100	330	352	1999	773	1304	125	848	490	89
63.6	0.63255	1.98215	0.407405	-2.00208		31	39	98	323	434	2096	741	1158	339	936	724	49
63.65	0.6337	2.05092	0.631551	-2.10065		14	30	92	322	461	1906	733	1301	181	927	264	102
63.7	0.63485	2.28501	0.432065	-2.74338		21	16	114	291	383	2443	672	1154	124	860	711	91
63.75	0.636	1.87504	0.382621	-2.19326		52	35	139	310	460	2046	862	1170	170	1228	915	64
63.8	0.63715	2.18029	0.570853	-2.57602		8	19	122	320	442	2210	817	1427	368	767	718	43
63.85	0.6383	2.03115	0.594831	-1.83958		41	44	116	325	502	2111	752	1355	73	795	663	72
63.9	0.63945	2.06379	0.44258	-1.87325		56	45	117	385	456	2307	745	1391	268	898	670	20
63.95	0.6406	2.02155	0.403064	-2.42561		52	26	104	369	440	2220	598	1508	231	742	860	62
64	0.64175	1.9703	0.483824	-1.91407		25	44	118	370	484	2140	674	1519	260	785	725	66
64.05	0.6429	1.88033	0.247439	-2.22066		21	35	147	359	413	2114	756	1694	382	1263	728	83
64.1	0.64405	2.11174	0.38171	-1.95916		49	41	134	355	426	2403	680	1603	213	876	460	40
64.15	0.6452	1.98506	0.481178	-1.78164		45	59	113	349	567	2551	690	1901	309	888	899	70
64.2	0.64635	2.18447	0.431291	-1.85691		55	42	109	310	414	2390	631	1326	86	882	731	40
64.25	0.6475	2.19495	0.407213	-1.93219		55	40	103	246	415	2480	563	1142	252	896	739	32
64.3	0.64865	2.41821	0.478721	-1.44019		66	59	91	249	402	2796	670	1012	287	839	704	5
64.35	0.65095	2.30451	0.194703	-1.58374		47	63	151	227	373	3076	678	1188	279	912	794	37
64.4	0.6521	2.22843	0.496265	-2.15946		80	34	137	221	484	2736	696	1046	221	962	564	45
64.45	0.65325	2.26789	0.475771	-1.8015		52	48	136	250	468	2809	842	1171	90	1034	872	41
64.5	0.6544	2.06559	0.515996	-2.14076		36	36	162	278	513	2416	779	1334	228	946	499	84
64.55	0.65555	2.10011	0.480375	-1.67429		76	56	154	269	483	2440	700	1386	97	982	399	66
64.6	0.6567	2.11738	0.562801	-1.83509		29	47	126	283	517	2447	843	1292	214	989	536	56
64.65	0.65785	2.12761	0.365263	-1.9593		43	45	153	340	460	2680	708	1585	364	877	764	33
64.7	0.659	2.2627	0.709999	-2.48601		17	23	118	333	562	2655	844	1248	173	910	898	58
64.75	0.6601	2.14294	0.476785	-3.32765		24	10	123	327	449	2376	724	1166	451	1122	746	67
64.8	0.6612	2.02461	0.54826	-2.25608		53	31	113	357	512	2241	730	1222	262	666	595	64
64.85	0.6623	2.20924	0.504683	-1.86173		47	44	110	354	469	2579	589	1140	166	887	424	65
64.9	0.6634	2.18004	0.461868	-2.36728		55	29	109	379	491	2737	757	1415	232	934	527	71
64.95	0.6645	2.14883	0.218797	-1.98598		66	44	131	339	399	2749	753	1349	225	793	821	56
65	0.6656	2.29206	0.320536	-1.98205		29	38	123	310	380	2729	633	1058	182	967	608	62
65.05	0.6667	2.1855	0.381292	-1.81139		29	49	133	287	439	2667	667	1118	346	913	588	60
65.1	0.6678	2.13562	0.315015	-1.89448		61	45	152	335	410	2532	658	1094	220	857	688	38
65.15	0.6689	1.97455	0.463931	-2.19866		55	39	133	318	559	2532	801	1186	286	1155	992	89
65.2	0.67	2.07436	0.586883	-2.16241		51	38	123	324	594	2629	891	1265	153	1018	632	126
65.25	0.6711	2.23807	0.47494	-1.91502		35	46	138	333	502	2927	883	1279	110	878	861	84
65.3	0.6722	2.18043	0.38241	-2.15129		49	40	128	342	504	3043	738	1326	277	919	631	132
65.35	0.6733	2.14426	0.511136	-2.07458		25	44	142	327	584	2990	836	1584	241	1114	936	115
65.4	0.6744	2.13055	0.544114	-2.75843		51	22	132	371	598	2922	774	1421	369	1063	819	90
65.45	0.6755	2.26618	0.563121	-3.93669		53	6	140	329	540	2965	858	1525	244	1183	938	86
65.5	0.6766	2.08468	0.486775	-1.87307		35	56	173	336	593	2931	843	1341	415	1017	969	60
65.55	0.6777	1.98028	0.799742	-2.24342		25	35	127	316	734	2390	891	1350	305	1309	624	90
65.6	0.6788	2.23326	0.66591	-1.91093		38	45	147	331	592	2838	757	1042	117	1023	914	52
65.65	0.6799	2.26651	0.336522	-2.0306		56	39	97	336	416	2866	740	1248	141	1088	679	58
65.7	0.681	2.33553	0.361045	-2.12631		52	34	111	357	409	2946	733	1306	204	898	810	24
65.75	0.68215	2.14783	0.344451	-1.77657		59	53	93	346	442	2683	702	1243	307	962	690	42
65.8	0.6833	2.21787	0.541274	-1.80819		27	50	130	400	524	2802	780	1199	221	971	549	57
65.85	0.68445	2.23202	0.789064	-2.38452		22	28	121	372	669	2832	796	1169	289	1164	466	81
65.9	0.6856	2.10654	0.54336	-2.27549		44	33	112	397	553	2640	766	1110	189	934	796	107
65.95	0.68675	2.28246	0.463644	-2.74039		37	19	88	368	468	2885	702	1178	322	1123	903	51
66	0.6879	2.19466	0.255148	-1.9596		40	44	97	390	403	2803	757	1181	227	983	658	87
66.05	0.68905	2.40014	0.515071	-1.96764		22	38	94	374	455	2997	816	1339	278	768	260	67
66.1	0.6902	2.23849	0.279306	-2.45506		35	25	109	385	385	2731	744	1248	202	978	846	62
66.15	0.6925	2.48284	0.600437	-3.60426		42	7	87	346	469	3081	784	1433	115	1275	605	66
66.2	0.69365	2.19198	0.30238	-2.41452		39	30	125	393	454	3004	810	1460	275	1121	570	125
66.25	0.6948	2.24513	0.29182	-2.5775		24	24	108	387	423	2983	862	1373	279	1115	804	110
66.3	0.69595	2.35208	0.606935	-3.4204		46	9	115	365	505	2892	800	1588	280	944	462	48
66.35	0.6971	2.22968	0.388037	-1.72322		36	58	100	355	479	3021	752	1363	203	1062	886	66
66.4	0.69825	2.18008	0.446424	-2.09659		70	39	97	329	496	2808	721	1458	326	1091	360	64
66.45	0.6994	2.11303	0.358098	-2.06279		54	43	130	335	484	2799	761	1411	265	1037	625	89
66.5	0.70055	2.49222	0.528564	-3.21622		25	10	125	379	423	3014	666	1155	173	969	706	42
66.55	0.7017	2.17906	0.219845	-2.31433		45	33	114	359	416	2951	761	1364	251	1199	1043	79
66.6	0.70285	2.33418	0.405033	-1.93633		30	43	84	339	447	3077	769	1251	250	962	781	54
66.65	0.704	2.42644	0.564796	-2.28413		23	26	77	338	449	2889	766	1247	258	913	455	37
66.7	0.70515	2.25568	0.373156	-2.10245		39	36	120	337	428	2812	770	1201	172	932	356	119
66.75	0.70745	2.29594	0.316252	-1.9628		20	43	116	383	420	3041	736	1383	329	1163	495	72
66.8	0.7086	2.37983	0.236461	-2.7481		34	18	96	394	356	3036	739	1363	374	1221	285	74
66.85	0.70975	2.23139	0.357395	-2.79249		30	18	114	495	420	2736	724	1348	213	1036	645	85
66.9	0.7109	2.23537	0.366579	-2.41293		43	27	100	431	435	2819	680	1197	235	1242	679	57
66.95	0.71205	2.17722	0.296113	-2.07413		56	40	100	395	428	2808	812	1090	266	1069	470	86
67	0.7132	2.37679	0.492569	-2.71146		37	19	101	411	468	3080	720	1093	190	1039	436	105
67.05	0.71435	2.32995	0.301943	-2.2475		39	30	102	401	384	2918	730	1510	174	1100	441	55
67.1	0.7155	2.3957	0.294569	-2.43198		40	25	72	327	382	3123	683	1355	331	1133	545	53
67.15	0.71665	2.47373	0.704596	-2.97268		12	13	101	342	514	3015	713	1405	134	1060	823	74
67.2	0.7178	2.22006	0.216807	-1.96216		32	43	118	363	380	2817	805	1169	202	1109	532	95
67.25	0.71895	2.31402	0.344119	-2.0582		41	41	115	358	453	3248	755	1148	191	941	708	107
67.3	0.7201	2.29892	0.307282	-1.85554		20	46	98	328	400	2931	761	1217	271	994	684	71
67.35	0.72125	2.32112	0.3288	-2.25394		25	30	81	337	397	2911	723	1222	319	1068	555	75
67.4	0.7224	2.32445	0.401541	-2.45942		48	23	82	378	402	2750	689	1210	98	1078	617	70
67.45	0.72355	2.28806	0.36161	-2.06459		41	38	91	383	430	2952	740	943	311	975	518	69
67.5	0.7247	2.45179	0.450464	-2.14258		8	27	72	316	361	2671	794	1102	122	1094	497	80
67.55	0.72585	2.35227	0.253042	-3.39038		46	9	120	401	344	2807	755	1170	182	1129	572	66
67.6	0.727	2.22898	0.152023	-1.74415		24	53	75	391	353	2817	788	1071	249	1193	866	75
67.65	0.72815	2.17696	0.0689668	-2.46708		43	27	88	408	341	2807	733	1352	234	1238	907	104
67.7	0.7293	2.1949	0.259298	-1.73656		20	53	76	423	390	2702	651	1022	367	1139	536	103
67.75	0.73045	2.07959	0.175184	-1.61397		33	64	107	414	383	2572	720	1791	122	1148	653	112
67.8	0.7316	2.26153	0.18662	-2.25122		29	29	86	407	332	2644	782	1250	158	1084	532	83
67.85	0.73275	2.16489	0.12598	-2.10083		38	37	87	339	343	2635	707	1213	321	984	720	80
67.9	0.7339	2.36864	0.244656	-3.04588		34	14	113	351	376	3145	797	1430	202	1229	671	100
67.95	0.7362	2.25683	0.410614	-2.60492		38	20	107	411	408	2585	702	1019	183	943	499	71
68	0.73735	2.19603	0.126083	-2.53651		26	24	116	344	344	2726	797	1093	251	1311	753	120
68.05	0.7385	2.17285	0.351563	-2.40363		43	29	110	347	456	2818	753	988	213	1163	902	117
68.1	0.73965	2.30918	0.360749	-1.99394		30	43	124	372	453	3179	818	1152	185	1067	650	95
68.15	0.7408	2.2673	0.29385	-2.47624		27	25	110	383	399	2871	874	1263	219	1366	424	105
68.2	0.74195	2.13217	0.159008	-2.44751		42	29	99	398	393	2827	798	1149	438	1337	773	91
68.25	0.7431	2.26766	0.0851333	-2.73326		24	20	144	399	335	2971	800	1452	418	1186	523	87
68.3	0.74425	2.18083	0.137566	-2.6428		24	24	110	391	387	2986	762	1455	408	1275	1041	126
68.35	0.7454	2.29947	0.301604	-2.24508		33	34	91	377	434	3200	742	1297	287	1143	591	120
68.4	0.74655	2.28629	0.406344	-2.63601		26	22	125	383	461	3021	694	1254	298	1318	550	98
68.45	0.7477	2.21327	0.460734	-3.23023		58	12	119	421	481	2775	705	1462	189	1370	721	68
68.5	0.74885	2.26595	0.34977	-2.37534		44	31	133	389	473	3214	742	1513	286	1142	510	94
68.55	0.75	2.2009	0.252684	-2.20714		44	37	117	426	433	3038	722	1285	363	1069	717	76
68.6	0.7512	2.10111	0.314684	-2.70255		40	23	143	392	470	2805	859	1198	326	1405	698	119
68.65	0.7524	2.22396	0.341526	-3.10392		45	14	119	423	439	2884	818	1099	291	1365	565	105
68.7	0.7536	2.30461	0.269751	-2.35202		68	25	90	416	344	2632	647	936	57	1176	530	87
68.75	0.7548	1.98584	0.112916	-2.1139		47	37	121	385	343	2232	713	1038	194	1273	727	83
68.8	0.756	2.13167	0.452359	-2.69824		40	20	126	404	467	2504	794	1632	201	1058	500	72
68.85	0.7572	2.23852	0.127621	-1.75557		18	47	94	474	309	2551	533	955	346	830	460	82
68.9	0.7584	2.3308	0.273544	-3.03899		36	11	93	396	302	2363	551	658	163	991	537	66
68.95	0.7596	2.39351	0.190763	-2.08236		54	31	76	370	301	2724	580	747	70	1137	547	77
69	0.7608	2.40385	0.432812	-2.58618		47	17	88	421	348	2498	569	557	246	1126	408	19
69.05	0.762	2.28033	0.212317	-1.96243		43	35	112	445	308	2436	616	746	75	875	487	69
69.1	0.7632	2.38876	0.151298	-1.67201		19	52	99	399	322	3017	692	906	198	1137	687	55
69.15	0.7644	2.52997	0.267647	-2.79374		19	14	96	420	299	2872	534	899	174	1156	472	49
69.2	0.7656	2.26907	0.0280213	-1.79273		74	51	95	390	315	2962	641	1144	296	1109	472	46
69.25	0.7668	2.46296	0.241486	-2.9601		31	14	98	386	344	3172	693	937	285	1168	395	99
69.3	0.768	2.30766	0.090809	-2.24749		37	33	108	443	342	3139	703	1043	264	1029	811	85
69.35	0.7692	2.34169	0.268034	-2.40228		32	27	114	372	390	3102	634	1005	299	1244	556	85
69.4	0.7704	2.42914	0.24488	-2.53583		40	23	75	394	371	3296	724	1165	207	1196	603	86
69.45	0.7728	2.41601	0.423162	-2.61225		26	21	104	384	437	3206	690	1156	128	1251	698	111
69.5	0.774	2.3462	0.237792	-2.16528		42	35	112	375	387	3187	709	1146	222	1287	575	64
69.55	0.7751	2.38805	0.0699069	-2.18838		26	30	73	443	287	2915	710	1055	251	1008	625	54
69.6	0.7762	2.45697	0.291914	-3.3515		38	9	107	424	344	2998	724	1248	175	1011	808	40
69.65	0.7773	2.3756	0.0966342	-2.22633		33	34	115	359	347	3389	706	1609	326	1191	612	65
69.7	0.7784	2.26121	0.258492	-2.5869		51	24	73	432	413	3060	754	1116	354	1419	647	83
69.75	0.7795	2.28358	0.267513	-2.32525		35	30	97	448	401	3011	671	1113	400	1017	453	92
69.8	0.7806	2.54482	0.470724	-3.78252		33	6	100	396	422	3358	691	1287	405	842	433	77
69.85	0.7817	2.51562	0.548805	-2.10795		26	28	123	421	399	2852	685	1312	15	1260	571	54
69.9	0.7828	2.44272	0.250225	-2.0711		35	37	98	387	377	3377	744	1186	172	1141	756	50
69.95	0.7839	2.43814	0.330596	-3.00399		34	15	103	429	421	3464	657	1312	283	1171	601	104
70	0.785	2.48002	0.296701	-2.12029		44	33	83	389	370	3284	803	1286	44	1202	661	91
70.05	0.7861	2.39413	0.396907	-2.86795		53	17	92	392	445	3279	722	1134	201	1123	474	124
70.1	0.7872	2.29465	0.181717	-2.65882		46	24	114	432	411	3400	741	1321	409	1239	757	92
70.15	0.7883	2.30619	0.267972	-2.38056		43	30	123	419	424	3255	716	1267	228	1253	633	90
70.2	0.7894	2.3926	0.410277	-1.92209		19	43	98	414	443	3216	796	1169	171	1419	406	96
70.25	0.7905	2.46414	0.128661	-2.70455		43	19	54	374	323	3338	740	968	303	1167	970	63
70.3	0.7916	2.33447	0.118323	-1.90811		41	46	106	402	349	3201	738	1087	293	1272	507	58
70.35	0.7927	2.26637	0.202675	-1.89875		32	45	89	371	368	2898	795	1081	275	1000	595	76
70.4	0.7938	2.45294	0.456876	-3.58868		62	7	95	403	400	2944	738	1088	142	1176	591	45
70.45	0.7949	2.32416	0.164015	-3.05771		38	14	104	392	351	3044	697	941	358	1319	674	101
70.5	0.796	2.19695	0.142758	-1.90822		59	49	88	330	381	2972	749	1234	259	1192	691	90
70.55	0.7972	2.20604	0.175021	-2.17635		62	34	82	367	357	2721	676	1178	266	878	545	84
70.6	0.7984	2.23122	0.237085	-2.18799		32	33	104	396	373	2740	718	1119	212	1137	563	87
70.65	0.7996	2.26585	0.150978	-2.68224		53	21	82	376	357	2959	731	1153	432	1183	590	76
70.7	0.8008	2.39776	0.23562	-2.18752		14	32	109	391	361	3137	709	1125	271	1252	762	65
70.75	0.802	2.46663	0.451889	-1.83389		49	42	116	373	413	3097	711	1133	15	1232	583	110
70.8	0.8032	2.45123	0.30258	-2.64711		68	20	125	405	382	3275	674	961	130	970	596	61
70.85	0.8044	2.2716	0.19547	-2.07586		30	39	146	392	378	3014	749	1008	271	1079	444	109
70.9	0.8068	2.51675	0.489336	-2.57639		18	20	89	349	429	3258	747	1036	217	1093	636	60
70.95	0.808	2.66185	0.658041	-2.91851		12	12	58	369	429	3182	736	1215	130	1225	409	59
71	0.8092	2.38519	0.232223	-1.87087		51	47	114	415	385	3315	720	1040	94	937	787	87
71.05	0.8104	2.39692	0.285805	-2.58012		55	23	90	417	404	3336	671	1136	205	1069	551	104
71.1	0.8116	2.38367	0.257418	-2.95611		46	15	83	347	373	3127	811	897	312	1095	896	64
71.15	0.814	2.36389	0.389381	-2.08892		41	38	104	382	453	3263	671	915	297	1173	392	91
71.2	0.8152	2.57332	0.346896	-1.53698		39	57	120	423	375	3475	717	967	48	847	440	66
71.25	0.8164	2.39152	-0.0367641	-1.98633		19	39	98	398	274	3107	804	1069	155	1085	943	83
71.3	0.8176	2.69475	0.456927	-3.35528		17	8	51	401	362	3393	812	1111	187	1263	567	51
71.35	0.8188	2.39367	0.207926	-2.19752		63	36	84	374	399	3550	746	870	353	1072	774	70
71.4	0.82	2.28461	0.0686765	-2.06012		73	42	99	388	353	3237	700	933	269	1056	739	89
71.45	0.82115	2.39224	0.216206	-3.06094		34	14	116	448	371	3269	770	1077	337	896	676	100
71.5	0.8223	2.34067	0.210191	-2.33602		22	29	124	478	370	3115	697	1000	307	886	627	102
71.55	0.82345	2.37842	0.132342	-2.41246		51	27	78	434	344	3251	737	893	244	1124	795	75
71.6	0.8246	2.54974	0.410554	-3.50646		39	8	85	418	402	3414	781	948	209	1143	676	71
71.65	0.82575	2.49606	0.367298	-3.68573		50	7	94	521	403	3387	829	992	238	1365	542	66
71.7	0.8269	2.49369	0.400662	-2.19459		52	30	71	422	402	3260	666	978	72	1125	500	90
71.75	0.82805	2.48102	-0.00923184	-2.69958		51	19	110	460	280	3378	567	926	209	1038	733	67
71.8	0.8292	2.44958	0.242043	-2.68915		39	20	101	404	375	3410	702	1170	181	1200	561	104
71.85	0.83035	2.46279	0.112727	-2.12189		39	35	101	433	327	3429	760	990	150	1017	621	81
71.9	0.8315	2.34128	0.120499	-2.42352		55	26	73	396	331	3050	716	832	241	1068	643	99
71.95	0.83265	2.53673	0.23119	-2.0655		33	34	92	417	338	3390	719	877	99	945	769	62
72	0.8338	2.45212	0.225445	-2.63812		43	21	97	406	368	3411	690	1043	287	1030	835	52
72.05	0.83495	2.1585	0.00555591	-1.7862		33	59	115	518	354	3048	749	1181	515	998	796	80
72.1	0.8361	2.46071	0.2994	-2.45744		14	24	98	468	378	3282	722	1250	206	1035	767	83
72.15	0.83725	2.23719	0.0463983	-2.28392		48	32	93	423	329	2942	661	1099	288	1059	827	86
72.2	0.8384	2.30861	0.10373	-2.76795		36	18	75	434	318	2884	688	1283	334	1105	596	82
72.25	0.83955	2.33379	0.0478407	-2.16938		46	33	75	435	303	2980	804	1215	231	941	555	64
72.3	0.8407	2.6156	0.0720963	-3.2952		13	9	99	474	261	3321	713	1110	178	982	639	100
72.35	0.84185	2.33998	0.137612	-2.27195		38	31	99	430	345	3121	748	1102	210	1088	429	125
72.4	0.843	2.29375	-0.0360516	-1.99236		47	41	77	453	290	2980	719	1133	222	973	702	76
72.45	0.84425	2.32567	-0.0804287	-1.91127		37	46	96	423	287	3183	747	1130	252	1187	598	86
72.5	0.8455	2.37055	0.115126	-2.42677		30	27	70	418	343	3272	813	1147	473	1029	726	76
72.55	0.84675	2.3166	0.0560622	-2.77715		51	19	90	420	323	3097	747	1026	368	929	544	126
72.6	0.848	2.29675	0.016175	-1.83876		27	46	105	451	294	2876	783	1299	228	999	523	57
72.65	0.84925	2.34718	0.0017531	-2.00678		34	42	103	464	313	3267	673	1277	295	1084	740	61
72.7	0.8505	2.45947	0.237891	-2.55087		62	23	107	481	374	3449	651	1344	322	795	496	41
72.75	0.85175	2.58727	0.244222	-2.30046		18	23	93	502	293	3051	550	884	171	452	700	47
72.8	0.85425	2.38663	-0.564988	-1.8388		87	47	114	507	168	3215	552	1113	345	918	484	37
72.85	0.8555	2.08841	0.200446	-2.19517		75	40	98	390	439	2900	746	1722	285	1387	770	81
72.9	0.858	2.21811	0.152812	-1.98445		40	42	92	461	356	2808	684	934	269	888	743	82
72.95	0.85925	2.42071	0.215264	-1.67057		26	49	102	437	323	2931	611	890	212	759	493	42
73	0.8605	2.33169	0.239724	-2.31376		57	27	76	443	347	2811	743	935	119	965	430	99
73.05	0.86175	2.38078	-0.0884812	-2.22665		36	31	73	372	263	3107	722	1072	207	1071	920	81
73.1	0.863	2.24526	-0.110862	-1.81383		52	51	93	416	280	2954	694	1232	299	848	654	73
73.15	0.86425	2.29445	0.144162	-2.90036		27	15	131	406	315	2705	723	968	232	1180	491	98
73.2	0.8655	2.47004	0.199022	-2.58907		25	20	95	391	325	3149	652	1042	177	1000	641	87
73.25	0.86675	2.25067	0.092759	-2.31337		54	33	92	436	366	3167	831	1035	258	1300	651	122
73.3	0.868	2.31048	0.0886694	-2.6745		52	20	85	451	317	2924	753	923	308	1173	649	59
73.35	0.8692	2.27974	-0.00794359	-1.70469		47	57	75	426	311	3064	719	1291	284	1028	463	88
73.4	0.8704	2.35626	0.0126852	-2.3054		63	32	95	439	325	3386	787	981	274	989	610	101
73.45	0.8716	2.26557	0.00303604	-2.34987		75	31	73	426	326	3132	738	882	357	1136	801	89
73.5	0.8728	2.16756	-0.0366286	-2.13614		63	37	65	453	302	2737	741	1141	299	1105	732	77
73.55	0.874	2.32479	0.194904	-2.25721		59	31	93	410	360	3029	812	1148	193	1093	463	66
73.6	0.8752	2.30048	0.0624715	-2.05077		32	40	102	410	331	3103	705	1211	250	1083	601	107
73.65	0.8764	2.32541	0.0705936	-2.20987		32	32	86	398	313	2984	725	1298	272	1100	462	89
73.7	0.8776	2.36022	0.0541056	-2.2517		58	31	91	440	311	3121	705	1033	159	1000	881	60
73.75	0.8788	2.43316	0.0881779	-2.85275		19	15	81	474	284	2963	724	1198	247	1197	570	71
73.8	0.88	2.59495	0.558513	-2.10923		13	27	91	411	389	2981	817	1289	22	1183	459	77
73.85	0.8812	2.29402	-0.0562664	-2.45091		56	28	100	402	307	3220	745	1138	262	1163	864	99
73.9	0.8824	2.20846	-0.191946	-2.27485		58	36	92	406	289	3187	751	3027	380	998	795	69
73.95	0.8836	2.24149	0.1176	-2.08247		25	39	111	427	352	2944	722	1664	339	1141	708	56
74	0.8848	2.32719	0.333596	-2.99093		40	14	80	454	389	2856	792	1172	271	1208	694	46
74.05	0.886	2.22332	-0.0434745	-1.95141		52	46	111	447	310	2991	794	1708	242	1058	457	76
74.1	0.8872	2.30486	0.182872	-2.20359		30	32	90	442	348	2905	753	1634	131	1057	694	77
74.15	0.8896	2.30409	0.260963	-1.98356		23	39	115	482	368	2839	674	1278	59	1150	964	92
74.2	0.8908	2.19852	0.000586441	-2.1144		62	38	106	449	315	2837	742	1461	188	1068	550	79
74.25	0.892	2.3382	-0.0522944	-1.85083		51	49	94	398	296	3232	733	1212	386	958	324	89
74.3	0.8933	2.3663	0.0120571	-2.37322		48	29	92	420	315	3317	754	906	295	1244	862	68
74.35	0.8946	2.3301	0.279028	-1.97577		47	45	113	465	429	3336	772	903	223	1096	681	74
74.4	0.8959	2.1865	0.0426995	-2.06607		47	42	103	428	346	2952	812	987	265	976	742	129
74.45	0.8972	2.38121	-0.038144	-2.28944		38	30	112	406	285	3203	789	755	270	986	840	72
74.5	0.8985	2.5511	0.120652	-2.38487		33	24	106	458	294	3341	674	701	172	1202	618	43
74.55	0.8998	2.32428	0.158173	-2.95256		68	16	98	439	359	3132	757	1086	211	1170	835	77
74.6	0.9011	2.3731	0.304186	-2.49411		19	24	103	430	394	3119	750	923	307	1016	518	131
74.65	0.9024	2.35124	0.44768	-3.48904		26	8	89	393	410	2751	731	842	235	1210	737	99
74.7	0.9037	2.35269	0.355811	-2.07993		24	33	113	420	377	2777	777	858	131	829	562	72
74.75	0.905	2.38058	0.326708	-2.80151		18	18	104	416	411	3205	734	936	383	1142	933	89
74.8	0.9063	2.34494	0.00946005	-1.99202		31	40	89	438	296	3059	848	702	291	1159	707	65
74.85	0.9076	2.29245	-0.039331	-1.78182		50	52	96	429	297	3058	660	873	350	836	658	70
74.9	0.9089	2.32538	-0.162154	-2.19904		36	33	90	503	253	3044	736	950	275	909	821	81
74.95	0.9102	2.3626	0.143942	-1.92923		24	40	88	441	318	2924	689	880	152	1069	763	73
75	0.9115	2.42638	0.153775	-2.15468		51	34	89	519	342	3319	826	998	165	885	660	56
75.05	0.9128	2.44545	-0.046459	-2.24368		37	29	80	526	261	3154	768	745	166	886	634	88
75.1	0.9141	2.37695	-0.0887664	-1.83228		37	46	119	451	263	3096	750	825	133	1042	530	94
75.15	0.9154	2.39678	0.126128	-2.36835		47	26	109	434	315	3051	668	784	152	1209	517	76
75.2	0.9167	2.44647	0.316818	-2.25098		33	27	126	458	352	2961	633	803	87	886	520	74
75.25	0.918	2.34412	0.00286523	-1.79971		24	46	99	495	279	2900	798	821	210	920	579	67
75.3	0.9192	2.38057	-0.205012	-1.80979		33	43	91	506	214	2840	680	705	194	960	781	39
75.35	0.9204	2.32905	-0.103935	-2.41449		49	25	117	453	252	2871	619	726	249	1163	349	107
75.4	0.9216	2.25018	0.0265139	-2.24754		24	32	117	464	311	2874	763	829	297	1142	768	97
75.45	0.9228	2.26333	0.313052	-3.00532		29	13	89	470	359	2524	751	889	176	963	697	95
75.5	0.924	2.40388	0.0484215	-1.80788		27	40	82	489	256	2699	558	734	182	1018	476	41
75.55	0.9252	2.2936	0.0936344	-2.56621		25	17	121	518	243	2193	601	810	83	611	715	55
75.6	0.9264	2.29763	-0.0698754	-1.68339		25	49	110	525	246	2625	629	865	124	877	553	76
75.65	0.9276	2.31506	-0.0526057	-2.02059		27	32	99	482	229	2444	551	828	204	526	641	54
75.7	0.9288	2.43801	-0.0375931	-1.75939		33	37	76	447	207	2461	508	793	58	676	502	58
75.75	0.93	2.5	-0.0653625	-2.35737		68	19	106	520	188	2445	484	645	164	734	434	8
75.8	0.9312	2.36226	-0.15046	-1.68579		40	42	75	488	195	2406	520	803	184	701	263	45
75.85	0.9336	2.53169	0.104772	-1.96068		58	27	77	500	213	2412	479	735	94	651	531	7
75.9	0.9348	2.26708	0.0356907	-2.44482		46	19	77	521	227	2114	572	804	164	694	513	27
75.95	0.936	2.58334	-0.0130527	-2.1315		44	22	65	534	183	2455	486	853	188	498	128	22
76	0.9372	2.39502	0.0655704	-2.1072		21	23	88	550	202	2075	479	835	97	492	321	35
76.05	0.9384	2.46804	0.0417929	-2.14528		19	22	73	524	196	2218	383	928	252	579	300	18
76.1	0.9396	2.44697	-0.152704	-1.899		25	30	67	560	172	2315	501	753	206	670	167	43
76.15	0.9408	2.33804	-0.067714	-1.91184		40	31	79	532	196	2173	446	779	142	525	525	24
76.2	0.942	2.55881	-0.0421565	-1.97078		32	25	58	525	172	2318	433	750	98	699	166	31
76.25	0.94305	2.37531	-0.279785	-2.10872		56	22	69	545	137	1949	407	698	226	512	147	21
76.3	0.94515	2.2856	-0.41642	-1.78645		35	31	63	520	122	1819	407	714	160	509	278	31
76.35	0.9462	2.56873	-0.320143	-2.08523		14	19	67	554	111	1995	408	612	203	613	200	12
76.4	0.94725	2.34754	-0.447929	-1.41649		37	41	62	572	108	1768	383	515	96	611	416	11
76.45	0.9483	2.19089	-0.567881	-1.59588		42	44	66	536	123	1941	515	694	259	686	501	22
76.5	0.94935	2.18965	-0.402555	-1.77486		50	36	91	516	142	1897	482	717	56	714	478	56
76.55	0.9504	2.24857	-0.303144	-1.99844		58	29	64	556	158	2027	611	794	147	774	483	18
76.6	0.95145	2.32907	-0.309049	-1.53282		23	45	75	468	153	2140	535	784	287	893	210	25
76.65	0.9525	2.17074	-0.248957	-2.20502		56	28	95	515	198	2226	548	927	150	826	360	94
76.7	0.95355	2.05983	-0.244273	-2.23164		66	27	90	449	197	1973	576	920	216	837	543	44
76.75	0.9546	2.18621	-0.287231	-1.82068		52	41	78	527	190	2254	643	962	234	997	329	39
76.8	0.95565	1.92738	-0.0903461	-2.06366		35	36	112	465	259	1948	606	885	252	928	683	95
76.85	0.95775	2.03892	-0.388517	-2.22376		61	30	108	466	188	2130	605	853	259	909	583	79
76.9	0.9588	2.27935	0.0308546	-3.78024		23	5	101	479	226	2141	666	958	146	984	546	91
76.95	0.95985	2.22101	0.0407388	-3.03364		19	11	52	468	238	2106	600	1027	260	1024	621	78
77	0.9609	2.02814	-0.472748	-2.17474		53	33	93	512	181	2207	697	1119	235	875	630	107
77.05	0.96195	1.93678	0.0424225	-1.56702		44	58	78	504	290	1928	713	1040	212	934	453	57
77.1	0.963	2.0205	0.0992032	-2.43876		34	26	101	461	329	2247	703	1171	245	1122	772	92
77.15	0.96405	2.00644	0.333438	-2.18322		27	31	85	491	384	2046	727	1179	170	1174	646	62
77.2	0.9651	1.88724	-0.238998	-2.22996		28	31	84	454	227	1903	776	3442	146	961	549	112
77.25	0.96615	2.06641	-0.0754238	-2.32672		31	28	67	449	266	2265	745	1496	298	853	600	116
77.3	0.9672	1.99973	-0.0110828	-1.98109		28	41	90	486	294	2196	722	1296	330	1092	419	104
77.35	0.96825	2.28681	-0.00244223	-1.82018		19	38	64	513	234	2309	694	1266	98	833	364	83
77.4	0.9693	2.07366	0.0423407	-2.22077		53	31	83	438	298	2272	703	1156	238	857	710	62
77.45	0.97035	2.0789	0.0145015	-2.02808		31	38	82	466	293	2309	702	1236	207	1048	631	93
77.5	0.9714	2.10678	-0.0196851	-2.08161		29	36	85	481	283	2373	699	1275	427	1135	409	66
77.55	0.97245	2.18468	-0.0547695	-2.26473		36	26	86	464	237	2225	661	1034	90	962	634	82
77.6	0.9735	2.11908	-0.148328	-2.80818		51	17	73	456	243	2346	678	1306	227	1109	659	104
77.65	0.97455	2.26718	-0.0306459	-1.90047		53	39	94	489	253	2518	600	1202	54	1084	405	96
77.7	0.9756	2.21717	0.100444	-2.18915		72	31	98	533	306	2541	680	1288	71	965	640	58
77.75	0.97665	2.18923	-0.0332779	-2.17868		24	33	68	547	282	2603	725	1171	248	1206	592	116
77.8	0.9777	2.21904	0.0830792	-3.1285		43	11	47	478	273	2311	732	1410	255	797	616	73
77.85	0.97875	1.95867	-0.034655	-2.35704		38	30	91	477	306	2246	724	1365	349	1132	669	115
77.9	0.9798	2.20167	0.217542	-2.08798		30	34	91	543	341	2480	587	1296	173	873	530	70
77.95	0.98085	2.15965	-0.0249749	-2.34174		50	28	99	499	284	2524	775	1274	245	1038	635	47
78	0.9819	2.18048	0.140659	-2.20918		32	31	94	476	325	2499	697	1282	126	1025	486	127
78.05	0.98295	2.31692	0.0898727	-2.21271		44	29	90	469	290	2689	684	1348	128	1007	287	84
78.1	0.984	2.3372	-0.0172585	-2.41515		25	21	77	424	231	2433	662	1222	110	955	373	93
78.15	0.9852	2.14126	0.00974524	-2.10479		28	35	81	464	290	2444	661	1281	325	949	570	81
78.2	0.9864	2.14377	-0.0925621	-2.03847		48	39	57	466	273	2555	649	1414	155	1513	664	105
78.25	0.9876	2.01437	-0.110937	-2.23845		37	33	84	450	277	2320	702	1264	317	1223	728	104
78.3	0.9888	2.11994	-0.0514084	-2.10919		53	35	72	435	274	2403	692	1174	230	1083	433	99
78.35	0.99	2.206	-0.0799912	-2.31496		29	26	62	478	243	2390	667	1316	240	1219	563	59
78.4	0.9912	2.2	0.124822	-2.99381		49	13	58	450	294	2342	645	1306	189	1176	596	73
78.45	0.9924	2.25503	0.129986	-2.02041		24	34	69	434	292	2445	676	1305	136	969	504	79
78.5	0.9936	2.2142	-0.134768	-1.84584		24	43	97	453	238	2493	685	1177	212	1067	320	106
78.55	0.9948	2.39855	0.107662	-3.14271		9	10	74	417	258	2550	662	1268	325	1126	698	61
78.6	0.996	2.2213	0.141421	-2.61718		43	18	78	435	284	2273	662	1381	174	1026	309	59
78.65	0.9972	2.27599	0.106445	-2.26414		30	27	76	418	289	2530	632	1608	170	1071	663	41
78.7	0.9984	2.17409	-0.0302227	-1.90738		41	43	95	476	281	2547	728	1435	67	1274	652	105
78.75	0.9996	2.26489	0.173726	-2.14791		12	26	90	443	265	2145	656	1602	39	1225	356	118
78.8	1.0008	2.03042	0.0634109	-2.28235		44	34	101	391	355	2538	718	1516	329	1199	780	105
78.85	1.002	2.35178	0.144396	-2.9765		21	12	75	420	272	2473	621	1431	159	1070	438	82
78.9	1.0032	2.12994	-0.117731	-2.13073		46	35	67	440	262	2480	595	1535	239	1275	527	95
78.95	1.0044	2.19318	0.0275582	-2.59348		26	20	58	425	275	2398	679	1464	197	1050	789	98
79	1.0056	2.26922	-0.06803	-1.93211		17	40	91	427	258	2671	734	1396	191	1076	703	73
79.05	1.0068	2.21913	-0.037594	-2.23482		23	29	83	383	261	2493	640	1349	375	1241	464	61
79.1	1.008	2.15371	-0.0660092	-1.93978		33	39	66	444	254	2338	669	1835	130	1017	471	93
79.15	1.0091	2.25195	0.0701557	-2.23886		34	31	89	396	312	2765	635	1361	308	1105	401	97
79.2	1.0102	2.22007	-0.0697455	-2.04981		40	37	87	405	268	2646	686	1480	134	954	606	109
79.25	1.0113	2.20345	-0.0247987	-2.30937		34	28	95	409	275	2553	692	1420	257	1146	441	76
79.3	1.0124	2.08034	0.22431	-2.78312		25	17	87	400	344	2201	759	1467	394	1232	473	65
79.35	1.0135	2.04381	0.0448729	-1.87499		35	50	94	491	341	2517	735	1563	218	1317	513	123
79.4	1.0146	2.14335	-0.145074	-2.55476		46	23	107	416	256	2524	702	1251	214	1140	700	99
79.45	1.0157	2.30737	0.0972633	-2.88686		19	13	78	371	257	2343	655	1243	127	1276	746	61
79.5	1.0168	2.27762	0.23841	-2.08219		14	33	132	421	336	2582	768	1296	85	1423	597	74
79.55	1.0179	2.32736	-0.0437478	-3.03176		23	13	73	399	258	2763	676	1349	284	1096	745	112
79.6	1.019	2.32593	0.291474	-2.54468		23	20	78	369	341	2608	663	1429	149	1241	321	113
79.65	1.0201	2.20757	0.0647249	-2.98613		42	15	97	401	317	2702	743	1392	277	1210	678	96
79.7	1.0212	2.25721	-0.0264222	-1.98688		24	39	89	401	277	2718	678	1326	271	933	527	93
79.75	1.0223	2.35803	-0.0743425	-3.36191		34	9	92	423	241	2744	702	1358	183	1149	715	83
79.8	1.0234	2.23138	-0.0148905	-1.86983		22	46	80	402	294	2779	793	1731	223	1124	436	125
79.85	1.0245	2.32503	0.272817	-2.14012		19	30	86	360	335	2608	663	1296	139	1296	598	53
79.9	1.0256	2.1876	0.230725	-2.22601		32	30	78	375	350	2477	723	1683	80	1229	650	112
79.95	1.0267	2.19157	0.269876	-2.63055		43	22	101	348	400	2733	789	1599	235	1213	709	71
80	1.0278	2.17264	0.197867	-2.08003		52	41	101	365	400	2882	788	1575	244	1235	640	72
80.05	1.0289	2.09733	0.125377	-2.09859		38	41	87	388	379	2723	801	1361	320	1260	705	116
80.1	1.03	2.1474	0.109335	-2.39392		32	27	87	382	330	2533	717	1357	230	1403	462	129
80.15	1.0323	2.33616	0.164763	-1.95664		15	35	69	397	292	2561	681	1158	71	1213	922	79
80.2	1.03345	2.08706	-0.338393	-1.74122		59	60	83	403	244	2759	634	1561	551	1010	613	96
80.25	1.0346	2.34194	0.279046	-2.07513		56	34	113	398	358	2817	708	1294	63	1044	475	63
80.3	1.03575	2.56032	0.127245	-3.82015		15	5	91	382	259	2951	675	1266	218	1317	460	88
80.35	1.0369	2.20154	-0.0353958	-2.22543		23	31	116	341	277	2594	715	1312	178	1366	577	117
80.4	1.03805	2.27759	0.145102	-2.45015		24	25	87	352	335	2826	704	1465	273	1221	623	94
80.45	1.0392	2.12378	0.0368188	-2.52478		34	23	102	358	298	2402	735	1690	210	1118	653	81
80.5	1.0415	2.2291	0.0218241	-1.87297		31	43	74	330	286	2600	697	1324	231	1031	498	87
80.55	1.04265	2.15767	-0.198433	-1.69853		45	56	88	326	251	2648	739	1339	303	1161	554	73
80.6	1.0438	2.24987	-0.101678	-2.3026		46	30	97	390	271	2846	636	1247	158	1129	864	108
80.65	1.04495	2.27609	0.0672934	-2.40419		47	25	100	387	296	2695	721	1388	77	1386	526	99
80.7	1.0461	2.1963	0.216558	-2.77081		30	18	97	390	357	2585	749	2171	136	999	773	99
80.75	1.04725	2.26773	0.224166	-2.06784		28	38	87	314	376	2902	735	1683	218	1375	569	81
80.8	1.0484	2.30144	-0.0501078	-3.08728		40	13	78	364	271	2846	740	1399	225	1267	704	121
80.85	1.04955	2.28527	-0.0796453	-2.24037		32	31	89	327	269	2863	706	1139	185	1166	787	123
80.9	1.0507	2.30233	0.0607717	-2.26741		21	27	96	357	277	2606	881	1078	339	1136	417	46
80.95	1.05185	2.42994	0.0186704	-1.94217		18	38	76	338	270	3010	733	1440	268	1235	668	36
81	1.053	2.22236	-0.0147778	-1.70255		38	54	101	338	292	2735	754	1552	103	1282	496	107
81.05	1.0539	2.18592	-0.0720762	-2.82236		48	17	97	354	266	2544	769	1290	391	1167	560	62
81.1	1.0548	2.07074	-0.0509417	-1.91631		50	48	99	376	310	2587	719	1067	355	1047	725	98
81.15	1.0557	2.02746	0.339252	-2.18159		58	41	134	389	510	2759	852	1384	151	1440	826	143
81.2	1.0566	2.28833	0.171243	-2.2083		45	35	125	389	378	3140	782	1046	364	1161	588	59
81.25	1.0575	2.448	0.48322	-1.98121		32	37	96	418	435	3103	627	1332	210	1140	603	18
81.3	1.0584	2.26287	1.03185	-2.45227		22	32	210	428	1043	3572	656	2074	171	1343	993	95
81.35	1.0593	2.19478	1.48587	-3.0106		38	20	357	374	1794	3645	795	3200	229	1335	290	134
81.4	1.0602	2.22625	1.1664	-3.29951		55	13	215	456	1131	3264	798	1669	204	1227	523	81
81.45	1.062	2.47371	0.51334	-3.18053		18	10	105	468	402	2855	635	967	365	840	518	38
81.5	1.0629	2.21292	0.109587	-1.7189		16	49	91	469	305	2499	712	806	273	920	544	87
81.55	1.0638	2.22896	0.305611	-1.9567		14	38	80	412	365	2498	751	897	178	1190	559	112
81.6	1.0647	2.3278	0.0555006	-2.68704		30	19	93	451	295	2862	715	931	267	1170	673	79
81.65	1.0656	2.29352	0.281076	-1.94781		28	38	99	463	353	2641	705	1096	234	979	275	58
81.7	1.0665	2.15625	0.200088	-2.32693		45	31	112	448	388	2744	710	1028	307	1187	598	89
81.75	1.0674	2.24054	0.271809	-2.72114		26	18	78	444	359	2571	741	911	339	1080	754	63
81.8	1.0683	2.19722	0.331259	-2.08574		34	33	103	421	370	2391	674	744	143	1141	450	78
81.85	1.0692	2.08587	0.234057	-1.74694		30	52	83	442	377	2402	708	796	232	1348	465	117
81.9	1.0701	2.07796	0.178102	-1.86167		52	45	111	480	346	2313	727	602	148	912	483	122
81.95	1.071	2.4503	-0.45937	-1.44519		51	50	81	443	134	2459	457	404	148	777	564	23
82	1.07195	2.41795	-0.154802	-1.57884		36	52	107	402	216	2830	551	545	329	1330	511	20
82.05	1.0729	2.07161	0.131951	-1.99512		52	41	96	354	344	2393	752	768	322	1210	600	70
82.1	1.07385	2.26093	0.145837	-2.71279		21	16	86	390	279	2313	792	730	211	1052	531	78
82.15	1.0748	2.092	0.152335	-1.92439		55	46	111	450	367	2553	816	611	235	1226	403	140
82.2	1.0767	2.13426	0.0461378	-2.40288		56	26	99	429	301	2429	759	721	240	1074	767	65
82.25	1.07765	2.44819	0.197279	-3.46994		40	7	90	397	274	2602	713	557	232	1258	303	67
82.3	1.0786	2.14082	-0.171483	-1.80464		49	50	98	482	256	2585	709	925	232	1084	427	115
82.35	1.07955	2.21283	0.0588888	-1.77761		30	51	79	441	320	2758	713	596	391	1107	557	118
82.4	1.0805	2.23748	0.0187962	-2.16145		40	33	83	441	292	2685	729	716	192	1204	627	107
82.45	1.08145	2.16932	0.162709	-2.25766		35	28	71	383	315	2343	836	967	151	1095	805	64
82.5	1.0824	2.22802	0.117519	-1.86973		28	44	87	444	321	2649	732	830	184	1090	644	92
82.55	1.08335	2.2252	0.177821	-2.13439		21	31	92	362	313	2425	768	869	99	1080	803	111
82.6	1.0843	2.23486	0.181524	-2.55778		42	21	83	418	325	2533	736	856	176	1091	860	60
82.65	1.08525	2.39081	0.151138	-3.4289		40	8	76	439	287	2695	681	719	184	1069	674	95
82.7	1.0862	2.17474	0.0990202	-2.47922		31	23	98	408	303	2415	699	693	331	1099	741	67
82.75	1.08715	2.3286	0.140059	-2.51392		20	19	64	509	270	2409	727	957	95	880	591	101
82.8	1.0881	2.20955	-0.153849	-2.42518		53	26	111	486	252	2678	753	763	244	1115	757	70
82.85	1.08905	2.16942	0.254605	-2.99756		36	13	86	513	336	2280	704	853	133	1061	644	113
82.9	1.09	2.27182	0.125191	-2.42629		32	23	80	461	295	2524	720	683	291	995	487	69
82.95	1.091	2.19577	-0.0043768	-1.78121		32	45	99	513	266	2401	659	578	200	933	433	92
83	1.092	2.34524	0.0682968	-2.28101		35	23	87	476	241	2349	644	902	159	860	403	28
83.05	1.093	2.30622	-0.113149	-1.90491		16	37	107	480	222	2495	678	767	197	989	583	56
83.1	1.094	2.23493	-0.0931773	-1.86813		42	40	91	474	236	2421	668	849	96	998	451	90
83.15	1.096	1.94849	0.0324446	-2.14831		49	34	90	468	301	2045	691	760	267	1158	529	101
83.2	1.097	2.03961	-0.0425741	-2.0967		25	35	69	462	273	2190	779	688	374	1127	671	113
83.25	1.098	1.95676	-0.224463	-1.95265		43	46	119	471	259	2294	724	709	329	1115	749	145
83.3	1.099	1.93969	0.0727658	-2.15465		30	29	97	417	269	1740	855	592	160	1175	425	90
83.35	1.1	2.26542	0.144551	-3.04105		29	11	84	468	266	2218	779	613	279	960	300	78
83.4	1.101	2.24335	0.149837	-2.4629		18	22	109	426	300	2434	754	595	144	1171	795	109
83.45	1.102	2.40064	0.15058	-1.61804		45	51	99	387	299	2837	680	642	75	1137	686	44
83.5	1.103	2.32036	0.264805	-1.43531		34	59	83	434	323	2523	713	735	37	1175	626	64
83.55	1.104	2.23504	0.206969	-2.34871		28	25	94	416	322	2447	820	851	185	1140	355	92
83.6	1.105	2.21208	0.308842	-2.02946		20	33	82	469	342	2294	722	762	101	1120	668	76
83.65	1.106	2.19855	0.0277228	-2.32365		26	26	83	424	273	2393	716	675	322	1178	599	72
83.7	1.107	2.36935	-0.00156316	-2.83897		21	14	61	438	239	2559	676	807	245	965	672	85
83.75	1.108	2.12164	0.0417844	-2.08512		36	36	69	435	302	2417	750	676	369	980	663	101
83.8	1.109	2.11706	0.161536	-2.05649		59	37	65	444	340	2403	774	682	164	1011	786	97
83.85	1.11	2.20018	0.271433	-1.74624		20	48	83	428	361	2484	785	867	159	1025	452	123
83.9	1.111	2.00395	0.0447735	-2.46857		64	26	77	457	321	2277	769	876	251	999	834	116
83.95	1.112	2.18272	0.081276	-2.06855		51	36	49	437	309	2527	707	969	231	1066	613	90
84	1.113	2.071	0.106276	-2.01188		40	38	87	415	316	2254	704	780	184	1159	469	129
84.05	1.114	2.39926	0.334928	-3.57709		35	6	45	374	300	2364	710	733	150	875	706	79
84.1	1.115	1.90989	0.240397	-1.70296		60	56	90	476	391	2076	791	835	248	1086	858	40
84.15	1.116	2.17565	0.210031	-2.57189		21	20	100	472	323	2306	772	805	99	1156	923	107
84.2	1.117	1.97775	0.0230652	-2.06945		36	38	96	455	308	2175	703	699	338	987	787	107
84.25	1.118	2.17017	0.297936	-2.05063		26	34	72	467	356	2315	754	819	221	890	736	53
84.3	1.119	2.13855	0.233889	-2.29184		34	28	118	466	350	2351	781	794	112	972	763	92
84.35	1.12	2.20318	0.217207	-2.31296		44	27	81	444	339	2470	747	719	241	732	597	84
84.4	1.121	2.23461	0.296072	-2.38381		50	24	79	453	350	2432	733	614	208	1099	373	69
84.45	1.122	2.17077	0.134589	-2.07562		36	34	101	480	310	2375	805	951	146	1005	456	70
84.5	1.123	2.2398	0.179566	-3.04294		30	11	78	362	276	2166	754	622	237	1077	507	67
84.55	1.124	2.08319	0.129576	-1.85862		54	43	105	468	314	2215	785	563	80	912	671	113
84.6	1.125	2.29497	0.0774796	-2.14304		37	33	95	400	304	2792	723	659	293	997	623	72
84.65	1.126	2.25247	0.277547	-3.11023		17	10	82	461	296	2133	646	778	177	1012	568	78
84.7	1.127	1.85286	0.147558	-2.3557		30	27	74	475	330	1816	826	862	362	1253	448	115
84.75	1.128	2.11293	0.0553271	-2.02411		17	34	103	519	272	2129	711	823	242	1068	520	60
84.8	1.129	2.14038	0.118054	-2.13014		39	34	107	505	322	2433	651	614	240	1005	574	97
84.85	1.13	1.922	0.00887861	-1.9435		46	44	99	396	310	2100	678	659	417	1072	798	86
84.9	1.131	2.19445	0.061486	-2.35374		37	26	91	484	291	2456	726	901	327	948	563	51
84.95	1.132	2.12837	-0.0312634	-1.80433		41	45	64	454	265	2297	742	801	194	1179	645	61
85	1.133	2.15145	0.139589	-2.13011		42	34	114	403	329	2460	715	795	184	1034	632	83
85.05	1.134	2.20129	0.236376	-1.70953		33	50	111	412	350	2497	712	760	136	926	658	67
85.1	1.135	2.18274	0.28977	-2.35522		16	24	128	418	338	2244	724	858	210	1095	551	56
85.15	1.136	2.28796	0.25108	-1.73851		18	48	108	456	351	2691	774	1072	95	943	564	102
85.2	1.137	2.10887	0.284417	-1.71187		12	47	92	460	346	2145	726	773	217	881	785	65
85.25	1.138	2.13976	0.266672	-3.12895		67	12	86	405	358	2330	685	976	208	1057	666	79
85.3	1.139	1.93233	0.13862	-2.16983		49	34	83	389	342	2056	837	1147	312	1142	500	75
85.35	1.14	2.2241	0.364187	-2.32391		50	27	71	420	397	2550	759	1050	121	1028	558	86
85.4	1.141	1.94288	0.267832	-2.52211		46	25	120	435	407	2173	717	1001	299	1040	643	109
85.45	1.142	2.08312	0.228856	-2.59592		26	21	118	407	354	2261	693	1024	368	1096	591	70
85.5	1.143	2.22337	0.388442	-3.23323		41	10	89	454	374	2343	835	885	350	1047	228	79
85.55	1.144	2.15373	0.363649	-2.06746		40	35	105	419	398	2384	742	867	304	1050	294	57
85.6	1.145	2.12898	0.318157	-2.72075		41	17	77	446	355	2171	702	754	131	1071	714	90
85.65	1.146	2.07736	0.139202	-1.90774		19	43	102	474	333	2313	713	922	191	986	1080	86
85.7	1.148	1.96065	0.409363	-1.86847		55	45	91	404	439	2071	820	743	181	933	805	55
85.75	1.149	2.10617	0.0775721	-2.17542		61	31	110	417	295	2243	683	700	239	932	431	65
85.8	1.15	2.07207	0.100349	-2.87858		55	15	98	404	295	2119	677	671	236	1055	688	82
85.85	1.15085	2.01097	0.229649	-2.02493		11	32	103	445	305	1811	677	623	214	941	561	97
85.9	1.15255	2.14322	0.0124829	-2.13703		31	31	102	477	266	2240	670	680	316	957	531	53
85.95	1.1534	2.2261	0.0221289	-1.82489		45	44	81	466	279	2528	652	604	178	827	809	69
86	1.15425	2.1796	0.149564	-2.31593		27	26	98	465	306	2330	753	630	257	1171	593	58
86.05	1.1551	2.07924	0.0861656	-2.42731		51	23	58	399	284	2084	781	841	148	1118	578	97
86.1	1.15595	1.87285	0.142232	-2.28552		35	30	118	409	340	1919	726	656	288	1224	796	98
86.15	1.1568	1.97842	0.26464	-1.77224		47	51	116	428	391	2170	789	726	198	1037	541	83
86.2	1.15765	1.86075	0.17732	-2.1308		56	36	103	448	362	1949	747	773	277	1058	905	60
86.25	1.1585	2.06867	0.00287465	-2.09777		29	35	98	460	286	2257	853	738	175	1078	730	113
86.3	1.15935	2.32301	0.424918	-3.51666		17	6	88	403	309	2062	721	973	119	965	566	44
86.35	1.1602	2.14547	0.296615	-2.40187		23	21	111	470	312	1982	729	712	76	812	770	63
86.4	1.16105	1.90548	0.157063	-1.74205		34	50	104	483	334	1919	742	706	240	1129	685	55
86.45	1.1619	1.96429	0.192365	-1.82556		51	44	88	471	331	1947	718	758	181	809	878	41
86.5	1.16275	2.08694	0.114541	-2.49151		38	22	106	489	298	2142	648	661	233	900	574	87
86.55	1.1636	2.10208	0.319234	-1.74261		38	43	87	450	338	2010	755	885	181	934	614	16
86.6	1.16445	2.17616	0.44483	-3.03333		17	10	102	417	324	1830	777	678	89	854	446	84
86.65	1.1653	2.14964	0.378379	-2.37412		39	22	97	436	345	2028	727	787	74	981	564	51
86.7	1.16615	1.99133	0.144207	-2.17388		48	32	116	468	325	2061	658	746	177	973	734	71
86.75	1.167	2.01163	0.247632	-1.88117		34	42	114	504	353	2060	840	785	97	1247	584	69
86.8	1.16805	1.97459	0.171953	-1.76773		29	46	115	504	320	1941	713	655	174	877	563	76
86.85	1.1691	2.08749	0.120732	-2.4034		59	25	88	495	312	2230	671	716	198	1034	733	62
86.9	1.17015	2.23521	0.285392	-2.51189		40	20	85	502	328	2305	678	605	128	787	789	60
86.95	1.1712	2.14578	0.0814899	-2.50079		29	22	86	556	291	2293	678	689	220	970	627	109
87	1.17225	2.27459	0.192202	-2.72894		61	16	74	508	297	2383	522	1170	153	701	627	44
87.05	1.1733	2.08795	0.410991	-2.44644		27	24	100	417	418	2236	748	1302	290	977	818	36
87.1	1.17435	2.15476	0.412504	-2.41125		33	25	85	460	421	2404	726	1010	209	869	777	65
87.15	1.1754	2.06926	0.199778	-1.79869		33	45	113	440	332	2153	740	789	160	815	796	51
87.2	1.17645	1.85675	0.142676	-2.05177		70	40	134	493	359	1993	646	729	304	1051	649	64
87.25	1.1775	2.2071	0.355097	-1.83376		21	40	98	504	357	2275	686	802	82	826	708	68
87.3	1.17855	2.14817	0.195701	-2.22549		32	27	92	515	304	2142	631	825	180	830	624	46
87.35	1.1796	2.25903	0.0918597	-1.67112		46	47	97	489	274	2393	596	615	187	834	573	27
87.4	1.18065	2.03602	0.208061	-2.03702		50	34	134	551	321	1997	645	612	206	879	591	29
87.45	1.1817	2.06936	0.0568842	-2.28955		54	29	105	489	303	2267	643	578	245	1012	517	115
87.5	1.18275	1.91801	0.136632	-1.56223		35	62	118	489	339	2013	732	695	170	960	708	89
87.55	1.1838	2.09291	0.0806914	-1.7452		15	48	119	436	298	2229	669	720	343	1147	861	46
87.6	1.18485	2.12135	0.25755	-2.44213		39	24	108	438	357	2302	693	765	254	968	587	70
87.65	1.18695	2.18747	0.0129139	-1.48688		47	52	74	557	233	2050	475	766	167	597	571	22
87.7	1.3793	2.15211	-0.393669	-2.19817		32	26	75	455	158	2015	556	899	181	996	577	58
87.75	1.381	2.13616	0.179592	-2.36985		28	25	124	459	320	2264	673	1057	332	867	481	47
87.8	1.38185	2.18537	0.215195	-1.60865		96	46	125	455	285	2044	648	1214	27	681	446	23
87.85	1.3827	2.17321	0.157654	-2.19536		29	29	97	455	305	2289	579	1089	158	856	670	66
87.9	1.38355	2.1851	0.337887	-2.31887		46	24	72	451	342	2169	619	959	158	732	640	38
87.95	1.3844	2.01362	-0.0816171	-2.33666		55	28	99	472	267	2170	645	984	276	961	600	83
88	1.38525	2.12679	0.0512365	-1.79		36	46	98	474	290	2311	679	1122	184	984	708	38
88.05	1.3861	2.12379	0.170637	-1.90283		36	42	91	460	334	2355	685	1222	247	799	378	80
88.1	1.38695	2.351	0.36221	-2.34584		31	25	114	440	375	2740	658	1432	119	801	349	80
88.15	1.3878	2.24763	0.191883	-2.29015		36	29	83	455	347	2711	595	1664	297	670	662	63
88.2	1.38865	2.19203	0.16933	-2.87519		46	15	81	504	315	2381	682	1517	147	931	492	85
88.25	1.3895	2.13669	0.07173	-2.20874		36	32	119	468	313	2468	615	1634	227	755	438	100
88.3	1.39035	2.30399	0.191761	-2.85276		32	15	83	529	315	2604	654	1672	213	707	425	79
88.35	1.3912	2.15967	0.0667646	-2.62448		36	20	94	509	295	2392	640	1697	228	731	624	71
88.4	1.39205	2.44916	0.329503	-3.26933		27	9	106	500	329	2740	648	1626	43	1018	847	68
88.45	1.3929	2.28768	0.104441	-1.975		49	37	79	473	296	2627	612	2411	146	765	496	30
88.5	1.39375	2.23296	0.131251	-3.85154		39	6	74	499	322	2634	692	2481	352	835	1038	67
88.55	1.3946	2.13267	-0.0232478	-2.03178		52	42	85	511	313	2703	559	1619	327	1071	494	93
88.6	1.39545	2.23581	0.0847093	-1.93967		21	42	109	525	318	2733	637	1669	242	868	513	77
88.65	1.3963	2.28909	0.0787554	-2.74461		32	18	92	514	303	2763	601	2066	199	942	877	50
88.7	1.39715	2.16403	0.146949	-2.78276		35	18	94	471	337	2533	776	1731	187	930	848	78
88.75	1.398	2.13686	0.110842	-1.76236		43	55	90	475	358	2715	646	1576	448	1101	475	50
88.8	1.3989	2.20489	0.0871767	-2.19648		36	32	98	471	314	2610	651	1465	208	815	619	74
88.85	1.3998	2.31693	0.204545	-1.99822		23	40	116	480	362	2993	639	1408	234	780	645	74
88.9	1.4007	2.11688	0.105475	-2.54286		44	23	108	483	325	2429	782	1350	257	790	504	87
88.95	1.4016	2.18898	0.0250208	-2.76388		35	19	97	466	309	2690	683	1584	286	1075	925	73
89	1.4025	2.14508	0.103185	-1.98205		37	43	80	504	346	2666	679	1628	225	973	634	94
89.05	1.4034	2.18467	0.186018	-2.4153		48	27	97	518	364	2686	654	1529	165	802	650	106
89.1	1.4043	2.10025	0.179981	-2.24356		57	35	97	449	395	2695	661	2369	330	941	740	50
89.15	1.4052	2.28341	0.120976	-2.52093		43	25	94	451	351	3051	689	1848	256	980	955	55
89.2	1.4061	2.15934	0.145662	-1.80815		38	54	99	489	381	2854	695	1731	310	778	658	79
89.25	1.407	2.13586	0.103114	-2.25258		46	33	85	456	348	2657	754	1819	238	982	719	73
89.3	1.4079	2.15689	-0.0556179	-1.98516		60	44	90	455	303	2769	648	1678	240	854	802	72
89.35	1.4088	2.33455	0.223096	-2.45793		17	25	121	511	365	3015	596	1662	363	858	532	81
89.4	1.4097	2.18261	0.23956	-1.92326		52	46	116	501	400	2792	736	1524	152	931	565	68
89.45	1.4106	2.14946	0.121016	-1.97253		49	44	132	493	357	2714	676	1344	244	860	656	59
89.5	1.4115	2.20653	0.115955	-2.73475		45	20	94	466	346	2799	725	1334	263	947	669	119
89.55	1.4124	2.07222	0.180072	-2.08017		48	41	96	459	393	2607	738	1303	262	953	940	78
89.6	1.4133	2.2695	0.13963	-2.93998		53	16	124	474	348	2928	619	1562	269	993	536	84
89.65	1.4142	2.10659	0.251637	-1.67536		60	61	86	449	419	2678	702	1675	117	982	834	80
89.7	1.4151	2.04243	0.189339	-2.13496		60	41	157	463	419	2673	846	1421	168	1303	516	111
89.75	1.416	2.18999	0.181858	-2.03784		33	44	116	475	405	3017	754	1393	349	1046	761	77
89.8	1.4168	2.20662	0.101262	-2.2878		39	31	100	496	338	2775	742	1128	316	1075	565	73
89.85	1.4176	2.42286	0.065945	-1.75086		12	46	103	416	283	2988	768	1348	186	827	569	66
89.9	1.4184	2.28262	0.162132	-2.23576		66	32	114	491	352	2934	711	1421	116	1013	517	69
89.95	1.42	2.26023	0.133489	-2.83693		42	18	127	536	351	2944	735	1491	305	743	580	92
90	1.4216	2.31045	0.0596211	-1.74691		36	56	114	510	341	3238	717	1372	226	957	467	94
90.05	1.4224	2.24784	0.28085	-3.04367		53	14	95	475	389	2781	707	1427	310	921	628	63
90.1	1.4232	2.19065	0.125111	-1.89121		24	47	115	461	353	2785	703	2080	239	1060	912	42
90.15	1.424	2.2813	0.207793	-2.30823		28	29	94	458	359	2855	691	1476	277	893	537	78
90.2	1.4248	2.37167	0.128652	-2.25026		18	29	63	491	313	2949	614	1736	242	909	614	88
90.25	1.4256	2.13322	0.216369	-2.21383		52	36	117	537	409	2781	725	1343	213	1139	708	73
90.3	1.4264	2.29818	0.217682	-2.25042		33	30	92	528	354	2835	668	1283	210	852	526	73
90.35	1.4272	2.516	0.176517	-2.52484		60	20	42	495	298	3092	704	1226	172	793	703	31
90.4	1.428	2.29272	0.145367	-2.58664		48	22	85	494	338	2894	601	1098	218	953	718	91
90.45	1.4288	2.24653	0.0840868	-2.19318		35	32	109	512	312	2712	652	1173	225	1045	453	72
90.5	1.4296	2.2604	0.286246	-1.98616		22	37	92	549	359	2585	661	1390	275	859	435	41
90.55	1.4304	2.27808	0.118052	-1.7432		35	44	118	543	283	2454	678	1213	56	783	370	70
90.6	1.4312	2.15661	0.234988	-2.35614		49	29	130	477	387	2644	670	1168	212	780	901	64
90.65	1.432	2.22979	0.136924	-2.6267		41	21	100	501	333	2700	687	1263	352	1144	603	44
90.7	1.4329	2.2073	0.132702	-2.12906		34	35	87	531	336	2675	633	1206	243	949	682	71
90.75	1.4338	2.314	0.321179	-3.73061		47	6	99	509	345	2531	578	1189	140	953	662	80
90.8	1.4347	2.11796	0.109689	-2.32279		52	31	101	529	353	2630	659	1447	256	1090	674	70
90.85	1.4356	2.1828	0.201892	-2.27465		41	30	116	498	357	2588	665	1240	380	945	399	49
90.9	1.4365	2.21853	0.203995	-1.95549		20	42	117	576	364	2729	667	1281	250	1020	444	86
90.95	1.4374	2.2986	0.160175	-1.97989		35	38	88	553	323	2741	708	1455	171	911	446	46
91	1.4392	2.16989	-0.0383086	-2.03319		33	37	92	572	272	2475	684	885	332	941	599	53
91.05	1.4401	2.22177	0.235643	-1.70486		28	53	96	484	369	2689	667	1057	182	829	624	83
91.1	1.441	2.39715	0.159435	-2.08253		27	34	112	537	320	2999	653	1095	150	905	704	47
91.15	1.4419	2.16501	0.0807729	-2.33003		46	28	74	495	312	2508	711	1170	183	916	825	76
91.2	1.4428	2.18054	0.0792306	-2.56952		34	22	112	482	311	2543	653	987	277	1100	827	61
91.25	1.4437	2.03916	-0.0135479	-2.16013		67	36	82	486	308	2399	662	1112	369	894	469	106
91.3	1.4455	2.37002	0.114955	-2.17464		17	31	106	472	306	2918	710	1343	307	993	335	74
91.35	1.4473	2.3519	0.20289	-2.0132		31	35	116	483	321	2753	613	980	281	726	531	30
91.4	1.4482	2.41347	0.163295	-2.45471		66	24	110	523	329	3122	582	1065	233	804	331	63
91.45	1.4491	2.2683	0.109547	-2.75265		59	18	107	489	315	2728	717	907	209	909	612	71
91.5	1.45	2.40877	0.0816659	-2.27337		37	26	78	516	274	2808	602	1026	97	806	497	94
91.55	1.45085	2.31805	0.178549	-2.56551		56	20	113	493	311	2642	647	1047	100	955	568	51
91.6	1.4517	2.31839	0.0354512	-1.7529		37	49	137	486	293	2873	628	1083	226	1077	576	27
91.65	1.45255	2.24919	0.0887349	-1.73834		32	51	116	435	317	2750	616	1189	206	844	511	76
91.7	1.4534	2.32973	0.178329	-2.25779		30	28	91	500	320	2751	659	1021	178	1154	884	33
91.75	1.45425	2.21108	0.0799754	-3.02496		52	13	130	478	290	2443	617	926	206	1039	642	58
91.8	1.4551	2.24519	0.06698	-1.6482		44	52	106	499	289	2552	664	891	75	870	588	75
91.85	1.45595	2.40528	0.302259	-1.6267		15	51	76	498	351	2875	535	814	124	869	628	108
91.9	1.4568	2.22568	0.214422	-2.00115		58	42	101	434	385	2877	702	1012	137	1070	614	107
91.95	1.45765	2.30903	0.217507	-1.88967		41	40	102	421	329	2664	645	852	281	839	477	31
102.9	1.4585	2.34064	0.431677	-1.94064		15	36	64	445	386	2604	683	910	84	962	891	89
102.95	1.45935	2.20766	0.146235	-2.53727		57	22	92	529	322	2530	657	1018	310	608	562	61
103	1.4602	2.33583	0.272991	-1.77978		34	38	104	516	296	2329	675	792	203	1017	324	10
103.05	1.46105	2.35723	-0.00814152	-1.84072		10	40	69	572	250	2662	619	740	437	1111	586	48
103.1	1.4619	2.34817	0.0100017	-2.34928		42	24	93	511	254	2632	636	731	142	1026	819	36
103.15	1.46275	2.37224	0.11319	-1.64396		10	49	86	489	284	2719	611	702	321	832	809	48
103.2	1.4636	2.26825	-0.236613	-2.02373		42	36	77	450	215	2632	673	731	312	1076	480	71
103.25	1.46445	2.3389	-0.0685975	-2.16866		56	30	78	508	245	2721	708	578	255	732	582	54
103.3	1.4653	2.35664	0.295668	-2.10848		22	29	73	478	321	2521	568	728	143	851	475	80
103.35	1.46615	2.25406	-0.027522	-3.17089		45	11	86	526	255	2497	665	732	305	899	674	82
103.4	1.467	2.35328	0.181101	-2.13619		17	27	78	478	274	2405	655	860	174	627	507	58
103.45	1.4679	2.41885	0.215007	-2.19627		28	27	102	493	301	2727	557	1003	231	925	450	25
103.5	1.4688	2.27834	-0.0746315	-2.28881		33	26	96	520	238	2503	644	707	174	930	606	71
103.55	1.4697	2.20184	-0.0612188	-2.35608		63	26	82	524	258	2480	607	720	212	1010	662	65
103.6	1.4706	2.22927	0.0629909	-1.72543		51	50	90	502	299	2609	601	662	236	919	524	59
103.65	1.4715	2.18441	0.00196558	-2.28193		42	27	92	438	265	2350	604	799	251	889	554	69
103.7	1.4724	2.20103	-0.0252914	-2.50323		45	24	100	504	286	2650	600	890	403	777	754	78
103.75	1.4733	2.47077	-0.0927193	-2.40006		24	21	76	490	211	2739	572	701	160	1019	514	65
103.8	1.4742	2.26867	0.0481731	-1.67534		53	48	81	534	269	2478	600	680	256	822	556	23
103.85	1.4751	2.25927	-0.381726	-1.76802		45	46	86	514	184	2581	576	746	316	887	653	43
103.9	1.476	2.29529	0.151704	-2.21987		37	28	78	504	300	2559	652	951	166	646	920	45
103.95	1.4769	2.27087	0.162067	-1.85439		31	43	117	459	323	2661	631	746	136	937	694	72
104	1.4778	2.30197	-0.0379388	-2.31962		36	29	90	489	284	2948	666	1537	315	807	657	66
104.05	1.4787	2.10837	0.0155722	-2.18482		27	35	138	512	316	2562	656	861	405	945	782	90
104.1	1.4796	2.1272	-0.0256665	-1.9496		53	46	126	484	315	2712	635	1090	257	992	666	87
104.15	1.4805	2.29744	0.0842272	-2.43842		60	26	121	477	324	2963	656	921	203	731	838	75
104.2	1.4814	2.2939	0.0778415	-2.15352		39	32	96	496	298	2733	669	809	131	782	798	90
104.25	1.4823	2.4575	0.187062	-4.11022		33	4	82	516	294	2847	694	931	321	1021	565	79
104.3	1.4832	2.1329	-0.0666505	-1.87249		39	47	95	482	286	2580	670	934	209	1155	672	106
104.35	1.4841	2.34853	0.208845	-2.39223		39	23	71	450	310	2634	697	703	185	936	522	62
104.4	1.485	2.35299	0.331317	-2.72987		50	17	105	475	363	2741	704	768	76	879	614	105
104.45	1.4859	2.35093	0.235968	-2.06035		29	32	82	492	318	2636	700	876	374	1077	508	16
104.5	1.4868	2.2565	0.210367	-2.35458		31	27	87	480	351	2716	642	781	297	1048	649	83
104.55	1.4877	2.45865	0.355374	-2.34394		19	23	64	424	342	2802	604	914	261	1267	723	24
104.6	1.4886	2.12988	0.168812	-2.31033		47	29	91	514	346	2459	704	960	143	1164	776	82
104.65	1.4895	2.16957	0.250983	-2.02763		29	38	108	489	371	2527	635	768	310	900	609	74
104.7	1.4904	2.21241	0.271722	-3.12644		36	11	85	521	329	2291	643	781	294	1041	573	53
104.75	1.4913	2.15136	0.0759918	-1.99268		40	35	105	463	277	2207	678	874	120	899	467	66
104.8	1.4922	2.38772	0.13938	-2.29774		39	25	89	414	286	2709	677	819	267	1055	392	33
104.85	1.4931	2.24182	0.190922	-2.14767		21	30	121	487	311	2418	669	885	183	1034	662	40
104.9	1.494	2.22369	0.0560821	-2.08874		43	37	115	466	316	2761	648	980	227	1201	689	57
104.95	1.4949	2.19034	0.0226892	-2.19932		70	31	91	417	286	2499	550	1281	141	978	654	61
105	1.4958	2.25899	0.034903	-2.49747		58	24	117	486	302	2792	727	997	267	890	716	46
105.05	1.4967	2.38689	0.183619	-1.97019		34	34	112	426	293	2653	620	905	65	792	605	59
105.1	1.4976	2.01507	0.0610012	-2.07747		57	37	104	483	314	2216	581	902	313	1087	405	83
105.15	1.4985	2.27413	0.139718	-2.45255		49	25	85	460	334	2823	633	863	237	1005	697	88
105.2	1.4994	2.44113	0.421336	-3.97927		14	4	93	507	326	2457	667	841	163	1023	580	80
105.25	1.5003	2.16038	0.0959291	-2.13766		24	36	108	457	336	2648	696	1295	441	1098	507	78
105.3	1.5012	2.18875	0.0677928	-2.34054		36	26	101	445	289	2410	654	1025	252	929	425	77
105.35	1.5021	2.18551	-0.0526787	-1.95096		41	43	115	486	287	2691	683	1039	304	926	604	64
105.4	1.503	2.16986	0.0867167	-1.90472		55	46	116	442	337	2706	765	896	378	900	387	71
105.45	1.5039	2.30781	0.158446	-2.4124		45	26	112	411	340	2917	666	910	220	1233	688	59
105.5	1.5048	2.10047	0.0847508	-1.87351		37	46	135	423	326	2447	725	897	212	969	774	65
105.55	1.5057	2.17662	0.132581	-2.47933		29	24	85	457	327	2525	730	925	306	1081	754	81
105.6	1.5066	2.39664	0.241464	-2.06112		28	34	74	422	340	2934	683	845	112	1127	883	69
105.65	1.5075	2.244	0.324031	-2.78112		30	16	107	452	357	2435	632	926	210	943	647	58
105.7	1.5084	2.0369	0.104372	-2.44043		56	27	87	450	344	2376	691	883	319	1345	898	69
105.75	1.5093	2.16039	0.176227	-1.53284		48	63	116	423	348	2531	673	783	94	1066	788	70
105.8	1.5102	2.50393	0.263077	-2.10516		17	28	105	404	299	2811	623	707	141	875	760	31
105.85	1.5111	2.14621	0.0221276	-1.92038		22	42	100	471	293	2451	590	1232	258	1158	637	71
105.9	1.512	2.20589	-0.0568824	-1.91392		13	42	100	448	269	2585	674	916	362	1115	691	97
105.95	1.5129	2.18971	0.137634	-1.99653		38	40	114	434	338	2631	616	865	180	1184	729	77
106	1.5138	2.25097	0.295671	-2.42143		18	22	112	421	333	2353	750	1023	351	935	581	25
106.05	1.5156	2.29644	0.191256	-2.19444		45	30	97	379	326	2676	674	857	142	1004	783	52
106.1	1.5165	2.32761	0.147875	-2.85498		20	14	124	420	282	2494	665	952	241	875	382	82
106.15	1.5174	2.11148	-0.0316132	-2.44684		43	26	110	439	291	2481	707	858	367	1278	565	86
106.2	1.5183	2.23244	-0.000755545	-2.26697		43	28	82	391	270	2519	636	704	198	867	883	85
106.25	1.5192	2.36644	0.212199	-2.5767		14	19	87	476	309	2664	720	763	247	1027	681	69
106.3	1.5201	2.31919	0.0675429	-2.33371		38	27	101	495	298	2832	654	777	164	1151	691	76
106.35	1.521	2.18937	0.102044	-2.04639		30	35	98	456	300	2419	619	846	176	1080	576	80
106.4	1.5219	2.02579	-0.00271115	-2.27915		43	31	118	455	302	2296	588	842	264	993	914	101
106.45	1.5228	2.10426	0.0381101	-2.27866		32	28	76	458	284	2242	686	691	304	949	721	89
106.5	1.5237	2.16859	-0.0145987	-2.41598		38	26	104	437	287	2547	562	1672	243	1118	488	91
106.55	1.5246	2.07746	-0.0015847	-2.03102		51	41	87	460	312	2495	655	1026	348	987	749	77
106.6	1.5255	2.24642	0.205435	-2.87953		36	15	102	401	328	2525	661	771	367	1271	551	55
106.65	1.5264	1.92301	-0.0160328	-1.97703		49	47	142	404	334	2322	820	925	510	1056	915	61
106.7	1.5273	2.16669	0.116928	-1.77593		37	47	81	417	312	2423	724	798	168	803	711	85
106.75	1.5282	2.04291	0.0582045	-2.08803		54	38	110	391	325	2365	683	955	252	1080	691	83
106.8	1.5291	2.06315	-0.0541278	-1.91185		23	44	125	415	282	2343	752	816	353	1333	681	71
106.85	1.53	2.09626	0.0219518	-2.0747		29	36	94	445	293	2332	716	785	337	976	587	95
106.9	1.5309	2.27953	0.202749	-2.95425		51	14	101	399	329	2625	651	668	318	1073	563	68
106.95	1.5318	2.10287	0.032958	-2.17119		33	32	90	416	290	2298	789	934	282	1098	629	63
107	1.5327	2.24979	0.057283	-2.62504		52	21	101	363	307	2750	733	900	357	1096	505	80
107.05	1.5336	2.18594	0.0774447	-2.42651		40	26	103	426	318	2619	763	914	265	1224	733	67
107.1	1.5345	2.0859	0.0131508	-2.05305		51	38	123	423	300	2384	675	913	238	1050	743	55
107.15	1.5354	2.14028	-0.0217438	-2.14621		70	38	118	424	318	2763	680	846	255	1001	851	95
107.2	1.5363	2.24068	-0.0768832	-1.68632		47	57	82	397	285	2893	656	938	364	1187	663	57
107.25	1.5372	2.1704	-0.00442395	-2.48612		59	26	132	422	311	2737	661	983	397	1114	751	55
107.3	1.5381	1.98873	-0.0459486	-3.10502		30	13	101	408	277	2119	673	2084	346	1067	704	103
107.35	1.539	2.28643	0.214808	-2.83269		34	16	87	356	337	2675	679	973	210	1182	696	94
107.4	1.53985	1.93709	-0.0649467	-1.88361		55	55	108	426	339	2510	679	1124	539	1157	900	99
107.45	1.5407	2.15716	0.00459631	-2.35626		47	30	108	431	318	2737	718	1416	166	1218	695	124
107.5	1.54155	2.21467	0.130208	-2.65171		37	20	73	408	323	2597	532	951	330	1013	765	113
107.55	1.5424	2.1798	0.105367	-2.09494		22	36	103	439	325	2587	726	1030	353	1290	750	51
107.6	1.54325	2.14488	0.0809216	-2.36809		38	26	113	379	301	2371	698	832	203	1256	633	74
107.65	1.5441	2.11133	0.0131884	-2.91132		44	16	96	371	298	2429	668	1397	343	1089	817	81
107.7	1.54495	2.31592	0.128885	-2.16398		22	31	103	432	307	2735	634	1149	204	988	525	76
107.75	1.5458	2.19448	0.128474	-2.46937		48	23	96	389	309	2439	734	942	208	1312	461	60
107.8	1.54665	2.20918	0.0604684	-2.52435		46	23	85	408	305	2615	723	870	295	906	966	66
107.85	1.5475	2.21594	0.0682815	-1.83217		41	45	132	428	301	2578	653	976	154	966	489	65
107.9	1.54835	2.13518	0.0002943	-1.83992		49	47	113	400	296	2503	661	1005	218	1123	599	60
107.95	1.5492	1.94968	-0.0287686	-1.50635		38	68	111	410	298	2155	721	885	400	1082	722	46
108	1.55005	2.24501	-0.0369325	-1.93047		32	42	92	428	279	2733	654	834	280	1142	746	66
108.05	1.5509	2.10269	-0.0752171	-2.28914		46	33	113	415	302	2666	690	842	424	1296	808	96
108.1	1.55175	2.19934	0.0788343	-2.24474		40	33	124	415	337	2809	679	1049	373	1092	629	71
108.15	1.5526	2.12631	0.118025	-1.88731		48	49	117	433	364	2712	651	905	264	1193	771	78
108.2	1.55345	2.11962	0.210677	-1.7246		34	54	107	424	374	2523	676	954	326	1129	445	72
108.25	1.5543	2.16173	0.145196	-2.35897		39	30	113	443	367	2757	738	1059	272	1149	963	75
108.3	1.55515	2.19076	0.11284	-2.15381		38	34	103	384	328	2620	659	878	220	1213	738	80
108.35	1.556	2.25975	0.343568	-2.82331		15	15	109	415	356	2419	706	1101	311	1054	699	43
108.4	1.55695	2.12911	0.0343487	-2.32886		51	32	102	464	340	2762	684	1299	293	1154	740	98
108.45	1.5579	2.2873	0.00879524	-2.19535		28	32	118	452	290	2831	651	739	217	1353	766	75
108.5	1.55885	1.97227	-0.133841	-2.063		59	43	120	405	296	2432	649	877	288	1357	865	132
108.55	1.5598	2.05842	-0.0452216	-1.92892		31	45	96	430	296	2426	734	813	289	1305	789	106
108.6	1.56075	2.24327	0.10201	-1.61806		33	53	142	411	296	2519	591	930	153	1223	531	32
108.65	1.5617	2.1661	0.0977459	-2.19185		26	31	121	421	306	2421	627	764	181	1373	720	80
108.7	1.56265	2.15814	0.124197	-1.9015		50	43	114	399	326	2492	670	883	179	1170	687	48
108.75	1.5636	2.3178	0.0887166	-1.82533		53	41	87	395	278	2583	694	946	27	1299	654	91
108.8	1.56455	2.28128	0.0908202	-2.6536		35	18	86	354	280	2503	735	862	167	1099	793	63
108.85	1.5655	2.13373	-0.0440687	-1.83937		70	47	95	416	283	2498	630	829	349	1408	791	24
108.9	1.56645	2.01256	-0.0617641	-2.31136		48	31	117	445	294	2340	700	786	286	1080	996	97
108.95	1.5674	2.1417	0.165088	-2.59106		39	23	96	383	362	2613	674	1078	286	1177	796	115
109	1.56835	2.13397	0.205527	-1.72236		34	48	105	473	330	2270	689	862	72	1042	671	78
109.05	1.5693	2.11924	-0.0564825	-1.9142		32	44	117	445	282	2484	692	744	307	1229	574	87
109.1	1.57025	2.07981	0.0022677	-2.49795		68	27	120	462	329	2627	691	802	388	1191	827	84
109.15	1.5712	2.19733	0.0433535	-2.02034		61	40	88	461	315	2715	727	744	225	954	614	94
109.2	1.57215	2.21931	0.265103	-1.97826		46	40	95	388	377	2661	630	716	173	1073	626	96
109.25	1.5731	2.10434	0.151149	-1.95128		63	43	130	388	352	2482	732	781	259	972	545	63
109.3	1.57405	2.08447	0.0656055	-1.96192		40	42	97	407	319	2402	730	760	291	1028	951	63
109.35	1.575	2.09668	0.00590389	-1.95974		34	43	79	381	307	2484	659	855	331	1042	894	112
109.4	1.57585	2.05956	0.190644	-1.80179		45	51	123	423	374	2424	766	760	258	1098	539	79
109.45	1.5767	2.20952	0.338553	-2.8669		47	15	128	431	370	2403	641	768	233	998	427	67
109.5	1.57755	2.13963	0.164242	-1.9982		47	39	110	355	339	2444	622	915	85	1099	998	102
109.55	1.5784	2.19098	0.20776	-2.449		32	24	118	364	342	2485	683	863	226	1065	739	72
109.6	1.57925	2.23558	0.229181	-2.29517		45	29	117	433	362	2692	596	667	180	987	741	96
109.65	1.5801	2.19813	0.170647	-1.94869		29	43	117	407	358	2719	654	880	183	1137	843	98
109.7	1.58095	2.36739	0.317515	-2.04275		12	32	80	358	339	2633	655	626	330	1196	845	38
109.75	1.5818	2.19986	0.120051	-1.60272		47	60	131	405	336	2689	647	723	231	1005	1012	33
109.8	1.58265	2.26049	0.15537	-2.69534		48	20	91	418	346	2840	694	786	304	1299	881	67
109.85	1.5835	2.12824	0.0580443	-1.96765		33	43	80	364	326	2584	715	905	294	1113	902	108
109.9	1.58435	2.20756	0.25427	-2.887		30	15	134	349	347	2447	696	861	406	1107	624	48
109.95	1.5852	2.34203	0.119866	-2.89707		41	14	120	394	286	2639	632	818	160	885	790	60
110	1.58605	2.11711	0.142174	-1.81301		41	46	99	336	325	2342	695	853	140	1053	795	76
110.05	1.5869	2.00971	0.0181422	-1.95024		52	44	123	388	315	2308	629	917	247	1156	827	71
110.1	1.58775	2.04515	-0.00295291	-2.17518		59	36	134	392	316	2450	679	879	296	1340	644	78
110.15	1.5886	2.34681	0.266579	-2.30794		28	24	133	408	315	2522	616	724	40	1136	691	96
110.2	1.58945	2.11939	0.100249	-1.77794		23	48	109	404	314	2365	505	763	246	1150	701	100
110.25	1.5903	2.22085	0.147512	-2.44709		51	23	99	348	308	2449	643	645	184	1046	981	52
110.3	1.59115	2.23485	0.132345	-2.07493		11	33	111	408	300	2456	694	651	211	1208	695	112
110.35	1.592	2.10711	0.214746	-2.41858		49	25	99	383	348	2309	697	724	268	1246	706	54
110.4	1.59285	2.07873	0.250963	-1.52943		50	59	101	388	350	2177	652	743	40	1195	784	104
110.45	1.5937	2.13201	0.164491	-2.58095		48	21	116	381	327	2339	684	792	163	1005	763	90
110.5	1.59455	2.02824	0.109696	-1.92428		31	45	153	422	344	2343	698	657	279	1173	901	75
110.55	1.5954	2.1026	0.114525	-1.8284		36	48	98	394	335	2446	688	678	181	1214	1025	88
110.6	1.59625	2.05439	0.0434673	-2.44144		59	28	104	388	336	2510	726	908	372	1364	797	82
110.65	1.5971	2.24753	0.19661	-2.0441		54	35	87	342	329	2558	703	787	149	1091	525	68
110.7	1.59795	2.17121	0.249393	-2.1875		34	32	104	416	366	2501	684	707	298	1085	729	59
110.75	1.5988	2.19343	0.173444	-2.01792		31	38	102	355	340	2563	613	733	271	1137	609	95
110.8	1.59965	2.02399	0.157445	-2.31393		55	31	111	400	367	2373	659	1340	418	1128	671	49
110.85	1.6005	2.06421	0.161974	-2.53441		48	23	111	374	341	2285	641	1019	342	1110	571	70
110.9	1.60135	2.15598	0.284585	-2.70057		52	19	99	379	376	2443	692	741	184	1299	953	66
110.95	1.6022	2.11833	0.104722	-2.04186		29	36	91	379	308	2307	566	845	304	1124	689	72
111	1.60305	2.201	0.107366	-2.11971		45	33	76	379	306	2483	609	652	268	1212	821	54
111.05	1.6039	2.09677	0.177012	-2.45007		38	24	71	376	332	2264	688	808	288	1065	916	75
111.1	1.60475	2.40476	0.338405	-1.89295		10	32	138	375	298	2353	588	576	69	1262	574	43
111.15	1.6056	2.01545	0.0873433	-1.78597		55	51	109	355	332	2283	664	649	249	1106	907	71
111.2	1.60645	2.12137	0.0633816	-2.42531		39	22	89	368	265	2075	700	767	280	1432	766	22
111.25	1.6073	2.2799	0.235635	-2.13686		37	29	91	360	311	2402	698	597	114	1006	603	64
111.3	1.60815	2.22498	0.314891	-2.87793		21	14	89	350	341	2303	650	638	338	1069	589	89
111.35	1.609	2.15831	0.0580594	-2.04302		54	40	136	313	327	2671	610	720	240	1185	1017	73
111.4	1.60985	2.1266	0.114156	-2.03516		48	38	115	347	326	2439	667	774	252	1200	596	68
111.45	1.6107	2.16003	0.228206	-2.64744		37	19	133	364	337	2326	601	545	241	981	781	86
111.5	1.61155	2.29844	0.495224	-2.28979		17	25	122	349	405	2458	734	751	215	1231	367	53
111.55	1.6124	1.87187	0.0291165	-2.6597		52	21	96	368	309	1951	754	900	420	1242	624	104
111.6	1.61325	2.18919	0.0819414	-2.43374		43	24	138	387	297	2443	725	772	200	1253	616	51
111.65	1.6141	2.22916	0.20466	-2.2393		22	27	92	388	311	2355	651	798	149	1155	755	67
111.7	1.61495	2.35812	0.151736	-2.33982		59	25	102	329	302	2743	697	669	62	1164	734	92
111.75	1.6158	2.24765	0.104451	-1.79623		24	42	81	353	281	2396	662	656	211	909	892	48
111.8	1.61665	2.19063	0.302644	-1.54521		20	52	116	392	330	2180	645	591	136	1015	418	59
111.85	1.6175	2.16565	0.316495	-2.60603		48	17	85	347	316	2008	687	643	218	944	552	29
111.9	1.61835	2.19501	0.0160231	-2.28311		47	29	142	415	289	2554	558	802	311	905	987	38
111.95	1.6192	2.19471	0.148693	-1.89438		30	35	94	383	270	2089	690	597	134	1060	777	26
112	1.62005	2.13335	0.0753443	-1.96255		50	43	104	410	330	2584	657	706	331	1001	730	77
112.05	1.6209	2.10545	0.104217	-2.06561		35	37	100	419	324	2397	697	723	207	1240	963	73
112.1	1.62175	2.19471	0.23901	-2.73892		74	17	97	331	334	2361	651	605	109	1199	742	90
112.15	1.6226	2.25294	-0.00970976	-2.06455		28	36	101	345	281	2700	746	892	286	1232	681	64
112.2	1.62345	2.25002	-0.01526	-2.84454		62	15	110	357	254	2447	677	640	148	1089	926	59
112.25	1.6243	2.15546	-0.123525	-1.96804		24	40	151	375	253	2471	677	696	316	1078	721	77
112.3	1.62515	2.31578	0.0514127	-2.22218		24	28	105	347	272	2618	684	719	228	1296	635	55
112.35	1.626	2.0648	0.0172058	-1.95118		46	44	122	371	315	2441	752	750	290	1159	855	68
112.4	1.62695	1.91684	0.0632371	-1.76786		59	54	132	377	337	2151	706	704	346	1139	842	53
112.45	1.6279	1.9995	0.180035	-2.24391		41	31	127	336	350	2159	650	741	199	1244	876	91
112.5	1.62885	2.26889	0.190681	-2.09236		29	31	95	335	304	2429	629	683	103	1167	698	83
112.55	1.6298	1.92446	-0.0382269	-1.80401		39	52	119	361	304	2164	657	798	262	1193	954	110
112.6	1.63075	2.03104	0.0572188	-1.81301		31	49	143	319	318	2289	731	700	313	1341	690	72
112.65	1.6317	2.26369	0.0910309	-2.41109		43	24	143	337	293	2573	705	630	192	1150	777	47
112.7	1.63265	2.12355	0.115484	-1.26772		55	81	107	321	323	2406	623	601	139	1190	461	95
112.75	1.6336	2.09927	0.049002	-2.39668		45	26	115	321	300	2331	695	647	450	1248	645	60
112.8	1.63455	1.9804	-0.0571211	-1.74722		38	50	120	342	271	2079	646	622	286	1234	781	64
112.85	1.6355	1.97533	-0.130961	-2.14788		45	33	127	357	248	2038	651	755	277	962	812	72
112.9	1.63645	1.96337	-0.113631	-1.96993		48	40	104	336	256	2043	586	716	294	1231	646	90
112.95	1.6374	2.08471	-0.0711165	-1.83661		47	45	119	364	263	2271	606	689	206	1125	823	59
113	1.63835	2.2495	-0.0428264	-2.28599		43	26	109	340	245	2425	627	688	263	1046	478	56
113.05	1.6393	2.17706	-0.0424099	-2.02544		32	34	94	338	247	2273	626	616	246	954	740	66
113.1	1.64025	2.10755	0.107614	-1.7855		35	50	86	368	332	2453	612	652	328	1348	826	75
113.15	1.6412	2.19575	0.307912	-2.04346		41	34	111	392	357	2358	574	575	170	1196	740	42
113.2	1.64215	2.03189	-0.0579136	-1.89412		55	44	100	356	276	2231	627	669	246	1286	806	69
113.25	1.6431	2.19133	0.167304	-2.26881		37	28	105	341	320	2422	585	604	320	1253	396	96
113.3	1.64405	2.17346	0.155175	-2.00544		40	34	69	333	295	2220	591	695	131	1295	676	70
113.35	1.645	2.20113	0.174136	-2.25571		46	28	115	298	318	2414	667	678	168	1241	499	83
113.4	1.6459	2.14976	0.183991	-2.49303		47	24	96	360	349	2492	612	689	341	1162	868	73
113.45	1.6468	2.3091	0.0503678	-2.54702		42	21	102	359	282	2699	637	806	355	1174	611	43
113.5	1.6477	2.31537	0.376281	-2.72887		32	16	101	343	357	2482	605	701	125	1041	693	78
113.55	1.6486	2.23947	0.235237	-2.2407		39	28	132	350	333	2471	553	510	125	1164	998	65
113.6	1.6495	2.13798	0.0920543	-1.73455		29	47	112	361	292	2259	619	798	129	1145	800	60
113.65	1.6504	2.09069	0.340761	-2.42942		43	26	131	338	415	2388	555	960	196	1253	933	73
113.7	1.6513	2.16661	0.236108	-2.25802		36	27	93	301	327	2254	635	607	293	1346	412	70
113.75	1.6531	2.16676	0.180421	-2.06777		43	34	139	348	322	2347	619	455	154	1146	624	86
113.8	1.654	2.38749	0.223816	-1.74278		28	41	118	306	293	2550	605	662	30	1286	576	99
113.85	1.6549	2.20157	0.314755	-2.57839		40	20	99	292	361	2382	632	819	219	1148	619	70
113.9	1.6558	2.16058	0.0807143	-2.31718		37	27	128	280	297	2377	708	635	295	1373	883	44
113.95	1.6567	2.14989	0.136809	-1.97037		43	40	94	342	329	2463	655	588	284	1186	705	76
114	1.6576	2.10952	0.0106433	-2.41143		31	26	109	350	293	2390	627	665	412	1285	852	87
114.05	1.6585	2.18737	0.0123933	-2.01246		44	40	133	296	303	2667	695	826	177	1226	755	98
114.1	1.6594	2.05265	0.156206	-1.78701		45	53	124	334	370	2465	669	662	356	1148	696	89
114.15	1.6603	2.31059	0.0489804	-1.69041		49	49	119	311	279	2678	648	1038	105	1101	399	60
114.2	1.6612	2.16914	0.090916	-1.81054		50	46	103	357	308	2461	522	662	174	1153	765	72
114.25	1.6621	2.18307	0.226678	-2.24197		42	31	130	350	366	2589	506	608	275	1350	761	78
114.3	1.663	2.14258	0.0389273	-1.79284		44	49	108	342	306	2508	631	689	249	1325	753	64
114.35	1.6639	2.23424	0.166018	-1.85661		62	43	111	348	325	2571	638	684	163	1392	494	45
114.4	1.6648	2.27939	0.0634331	-2.30369		39	27	87	316	288	2641	648	615	269	1486	594	73
114.45	1.6657	2.25765	0.0380828	-1.95213		41	41	81	341	300	2761	660	658	282	1319	742	73
114.5	1.6666	2.18106	0.037991	-2.27489		50	29	93	288	293	2498	617	764	288	1395	637	74
114.55	1.6675	2.18793	0.173025	-1.97629		43	38	110	353	326	2445	649	623	126	1116	885	71
114.6	1.6684	2.26859	0.0972248	-2.50209		48	22	120	312	296	2596	619	647	333	1247	569	49
114.65	1.6693	2.20845	0.030499	-1.63549		49	55	64	330	291	2569	684	657	277	1356	774	46
114.7	1.6702	2.36587	0.190577	-1.92869		43	40	88	324	333	2932	642	724	143	1348	667	66
114.75	1.6711	2.22467	0.0395571	-2.1507		25	32	91	363	286	2543	633	804	441	1363	466	68
114.8	1.6729	2.44249	0.306109	-2.02822		12	31	74	302	320	2710	565	588	251	1166	788	53
114.85	1.6738	2.32598	0.373736	-2.73978		25	16	92	345	360	2536	606	603	158	1136	963	73
114.9	1.6747	2.14237	0.0512069	-1.97317		60	42	106	370	318	2574	726	677	299	1060	765	60
114.95	1.6756	2.21596	0.0160243	-1.95109		38	40	109	370	286	2581	612	640	264	1352	737	53
115	1.6765	2.22819	0.277861	-2.12852		48	32	137	386	355	2496	682	672	85	1462	571	61
115.05	1.6774	2.29705	0.287426	-1.88027		45	42	106	368	367	2738	650	709	144	1022	839	45
115.1	1.6783	2.27201	0.192573	-2.17064		52	32	95	346	340	2720	588	729	248	1349	553	59
115.15	1.6792	2.23079	0.206076	-2.20348		41	31	98	325	345	2613	654	788	249	1448	643	55
115.2	1.6801	2.39024	0.308209	-2.37934		32	23	77	363	338	2711	602	579	141	1322	661	68
115.25	1.681	2.18642	0.0169272	-1.85487		40	50	105	357	325	2845	612	663	402	1545	811	80
115.3	1.68185	2.03411	0.236469	-2.62437		52	21	99	328	367	2215	573	742	379	1350	656	85
115.35	1.6827	2.09806	0.137318	-2.27921		47	29	125	324	325	2309	616	665	156	1245	989	82
115.4	1.68355	2.31603	0.0656295	-2.28914		31	28	110	371	295	2800	559	623	245	1243	732	87
115.45	1.6844	2.08114	0.263175	-2.00748		23	35	113	314	339	2088	633	746	185	1265	498	88
115.5	1.68525	2.2642	0.2518	-1.6855		38	50	88	345	347	2596	618	718	85	1091	731	95
115.55	1.6861	2.31679	0.161604	-1.77452		49	44	126	309	305	2632	618	684	250	1140	328	35
115.6	1.68695	2.22029	0.0351075	-1.87443		35	44	137	345	297	2641	571	696	149	1197	682	112
115.65	1.6878	2.24817	0.079479	-2.05261		54	37	112	338	312	2729	648	651	168	1232	738	79
115.7	1.68865	2.29241	0.113816	-1.54528		16	55	110	315	289	2553	514	703	163	1101	733	81
115.75	1.6895	2.28399	0.191057	-2.1823		39	30	101	340	322	2611	647	565	184	1280	918	47
115.8	1.69035	2.19634	0.21236	-2.34367		34	26	117	342	335	2436	472	534	284	1311	721	80
115.85	1.6912	2.21436	0.0729403	-2.02987		67	37	113	317	303	2579	542	749	103	1242	796	87
115.9	1.69205	2.15941	-0.0987576	-2.02244		49	39	91	337	267	2554	652	587	228	1383	856	104
115.95	1.6929	2.21509	0.101707	-2.1203		42	31	96	313	286	2367	560	652	131	1302	788	68
116	1.69375	2.11587	0.00399547	-1.88857		27	44	125	357	292	2413	582	823	372	1184	715	65
116.05	1.6946	2.29928	0.150745	-1.94774		43	39	113	316	318	2726	591	730	169	1280	738	49
116.1	1.69545	2.09499	0.290702	-2.03169		52	35	87	312	357	2169	626	714	306	1169	278	77
116.15	1.6963	2.2461	0.119989	-2.01849		40	37	130	315	314	2632	623	621	206	1335	592	69
116.2	1.69715	2.36778	0.175367	-2.46988		51	23	118	276	324	2902	618	600	295	1205	547	63
116.25	1.698	2.15284	-0.0232414	-2.08978		32	39	103	333	308	2714	628	621	476	1468	859	115
116.3	1.69885	2.17919	0.170954	-1.7647		49	42	114	322	291	2168	640	637	131	1382	245	55
116.35	1.6997	2.10755	0.195329	-2.43175		59	24	113	304	332	2247	572	718	145	1331	867	69
116.4	1.70055	2.20595	0.125308	-1.83671		69	44	109	303	313	2507	554	598	201	1222	614	50
116.45	1.7014	2.28333	0.154627	-2.05929		38	33	122	311	302	2538	582	662	127	1180	497	86
116.5	1.70225	2.14123	0.0642178	-1.52599		40	63	98	312	309	2466	575	605	250	1379	493	101
116.55	1.7031	2.07996	-0.0515412	-2.62742		63	21	109	310	276	2326	604	756	381	1311	803	69
116.6	1.70395	2.15085	-0.0244963	-2.31591		43	27	110	359	267	2351	634	585	368	1381	773	42
116.65	1.7048	2.02059	-0.0136801	-2.47675		69	27	124	302	317	2424	616	1703	317	1157	764	77
116.7	1.70565	2.10715	0.143863	-2.1773		32	32	114	301	326	2322	614	881	338	1381	647	59
116.75	1.7065	2.30116	0.153179	-2.07144		26	32	117	309	296	2536	671	678	136	1402	735	50
116.8	1.70735	2.05392	0.206321	-2.0879		41	36	108	331	357	2265	655	994	205	1174	1057	51
116.85	1.7082	2.16737	0.225131	-1.97209		18	39	109	314	351	2448	681	693	271	1271	874	80
116.9	1.70905	2.24716	0.156924	-2.0433		54	37	80	370	334	2701	612	595	219	1329	850	61
116.95	1.7099	2.10104	-0.0108671	-1.97876		53	45	106	291	322	2661	670	733	334	1424	1105	87
117	1.71075	2.33266	0.302744	-1.31632		28	62	111	386	313	2383	648	597	56	1362	408	35
117.05	1.7116	2.17042	0.263894	-1.4824		47	60	102	281	344	2315	617	696	54	1221	747	85
117.1	1.71245	2.07974	0.131076	-2.47322		43	23	134	351	311	2183	615	592	201	1168	749	84
117.15	1.7133	2.30067	0.0674655	-2.14081		37	30	85	335	273	2547	599	637	285	1026	486	64
117.2	1.71415	2.2812	0.233733	-2.17805		68	26	118	323	290	2247	698	731	291	1211	339	8
117.25	1.715	2.27331	0.0241928	-2.09745		41	29	106	310	242	2294	568	565	132	1321	888	28
117.3	1.7159	2.1991	0.269408	-1.93887		41	40	130	388	364	2507	657	625	100	1220	594	95
117.35	1.7168	2.1854	0.0656549	-2.2939		45	29	125	345	307	2557	617	699	258	1223	707	75
117.4	1.7177	2.17053	0.0772934	-1.92756		37	40	92	311	297	2409	637	786	250	1266	792	49
117.45	1.7186	2.15113	0.0958595	-1.82489		28	46	114	314	314	2452	656	673	226	1178	726	96
117.5	1.7195	2.16404	0.182155	-1.89444		28	44	122	321	351	2547	617	865	236	1181	625	98
117.55	1.7204	2.16112	0.0920179	-2.09008		71	37	95	331	328	2597	659	740	220	1150	759	78
117.6	1.7213	2.12752	-0.0123476	-2.24479		44	31	127	344	289	2456	670	671	239	1457	668	89
117.65	1.7222	2.23379	0.23013	-2.44552		15	23	132	315	334	2477	570	746	222	1416	925	83
117.7	1.7231	2.23407	0.450279	-2.44009		24	21	118	264	378	2250	612	571	195	1346	417	75
117.75	1.724	2.25167	0.132959	-2.22018		23	27	94	317	284	2363	631	687	334	1433	985	22
117.8	1.7249	2.18333	0.112774	-1.57671		48	60	119	320	325	2577	666	539	223	1361	664	54
117.85	1.7258	1.92757	0.0618486	-2.05947		39	38	111	335	317	2048	605	584	406	1380	721	96
117.9	1.7267	2.1331	0.0663659	-2.15913		29	31	104	303	287	2267	720	614	251	1409	596	82
117.95	1.7276	2.02966	0.0145323	-2.03486		34	38	123	301	295	2213	537	588	337	1316	818	102
118	1.7285	2.13124	0.195872	-2.12835		36	32	107	337	327	2265	612	554	244	1059	789	67
118.05	1.7294	1.96341	0.0792959	-1.90423		79	41	97	287	298	1961	619	631	249	1233	697	43
118.1	1.7303	2.16921	0.202851	-1.77364		22	46	120	337	332	2372	581	590	247	1044	849	65
118.15	1.7312	2.10238	0.131254	-2.30054		37	29	99	327	330	2369	638	736	306	1290	722	95
118.2	1.7321	2.21412	0.251682	-1.99684		46	38	122	320	360	2562	634	628	278	1171	436	65
118.25	1.733	2.12596	0.0443761	-1.87118		49	43	94	339	292	2341	618	599	191	1296	679	79
118.3	1.73395	2.24574	0.350993	-1.61752		36	50	84	300	358	2381	635	614	256	1348	526	24
118.35	1.7349	2.15926	0.0648677	-1.61893		57	57	90	318	307	2493	663	553	208	1250	708	67
118.4	1.73585	2.36414	0.150736	-2.04649		54	28	134	290	252	2305	606	495	120	1092	534	15
118.45	1.7368	2.05724	0.00491177	-2.19601		36	30	85	296	271	2110	568	688	405	1198	797	63
118.5	1.73775	2.03522	0.18149	-2.49953		51	20	90	389	292	1864	595	596	181	1179	548	54
118.55	1.7387	2.20062	-0.0887258	-1.85298		43	43	122	325	251	2477	537	604	319	1041	648	57
118.6	1.73965	2.10671	-0.0650201	-1.849		71	43	77	317	256	2246	511	509	271	1200	795	60
118.65	1.7406	2.14957	0.13616	-2.17606		35	31	98	293	313	2344	637	626	238	1371	967	60
118.7	1.74155	2.10429	-0.0745927	-1.42081		60	70	78	314	269	2377	584	635	203	1328	732	73
118.75	1.7425	1.95413	0.0187121	-2.10488		76	36	117	299	301	2085	600	629	379	1286	645	62
118.8	1.74345	2.22764	0.192037	-2.03504		52	33	115	319	306	2343	629	510	88	1250	797	53
118.85	1.7444	2.28907	0.313352	-2.62522		47	18	101	309	340	2452	573	581	409	1264	611	24
118.9	1.74535	2.13906	0.26534	-1.90997		36	41	120	303	361	2351	575	594	247	1016	1019	51
118.95	1.7463	2.29661	0.481559	-2.16802		11	27	88	322	382	2346	575	719	178	1493	468	77
119	1.74725	2.07538	0.272401	-2.84503		44	17	113	334	384	2330	574	710	354	1332	1135	71
119.05	1.7482	2.16582	0.221613	-2.3374		32	26	111	364	336	2348	575	546	304	1172	708	69
119.1	1.74915	2.21448	0.295886	-2.11406		49	30	112	332	334	2275	607	622	33	1304	901	91
119.15	1.7501	2.0754	-0.0662965	-1.94507		69	44	110	313	288	2452	630	557	314	1361	825	79
119.2	1.75105	2.11868	0.10538	-1.69674		21	48	134	315	291	2179	484	431	283	1069	672	91
119.25	1.752	1.98532	-0.057106	-1.8724		43	42	104	300	258	1989	610	542	268	1425	892	53
119.3	1.753	2.06207	-0.023283	-2.26084		43	27	99	353	253	2036	613	530	204	1440	829	55
119.35	1.754	2.20074	-0.0354905	-1.7779		47	45	104	293	257	2405	600	530	325	1340	768	30
119.4	1.755	2.10127	0.0387532	-2.4712		41	23	115	313	283	2226	653	587	202	1295	859	90
119.45	1.756	2.11492	-0.0616847	-1.51116		61	69	93	357	294	2592	600	540	435	1209	730	66
119.5	1.757	2.22746	0.151353	-2.18513		45	29	90	319	300	2392	615	441	236	1293	747	52
119.55	1.758	2.14129	0.0406228	-2.60593		28	19	95	353	268	2190	623	658	161	1396	901	97
119.6	1.76	2.17623	-0.0468025	-2.22077		44	29	108	342	255	2355	687	492	120	1171	1049	94
119.65	1.761	2.03746	0.103404	-1.54989		43	58	85	309	303	2096	669	589	164	1207	580	92
119.7	1.762	2.26414	0.0917256	-2.08009		44	31	108	326	272	2388	709	583	108	1552	587	43
119.75	1.763	2.23585	0.26779	-1.80852		21	40	93	322	319	2283	571	597	128	1139	637	77
119.8	1.764	1.95165	-0.00763013	-1.51716		56	61	92	308	276	1958	646	534	138	1278	801	84
119.85	1.765	1.91606	0.146444	-1.88285		44	46	99	310	350	2054	610	538	385	1305	910	87
119.9	1.766	2.24761	0.257752	-2.00779		43	33	101	306	318	2326	633	525	249	1258	653	22
119.95	1.767	2.05503	-0.038156	-1.77276		59	51	118	308	289	2344	623	513	392	1302	779	57
120	1.768	1.94384	0.200442	-2.05511		77	37	122	362	353	2018	687	543	245	1134	627	58
120.05	1.769	1.99812	0.0653669	-1.94465		40	41	147	338	306	2114	671	582	235	1390	663	69
120.1	1.77	2.34559	0.410415	-2.10958		42	28	101	326	348	2410	589	535	74	943	713	45
120.15	1.771	2.30474	0.448167	-2.61113		16	16	100	326	341	2183	685	558	82	1270	491	94
120.2	1.772	2.12025	0.1308	-1.95176		35	40	89	336	321	2347	592	523	354	1281	574	98
120.25	1.7728	2.11631	0.22512	-2.88988		36	15	102	342	338	2240	633	618	260	1294	787	101
120.3	1.7736	2.21744	0.343506	-2.45156		42	22	150	341	360	2345	606	528	54	1116	839	119
120.35	1.7744	2.09829	0.223238	-2.21489		42	31	95	387	355	2315	589	641	186	1359	872	84
120.4	1.7752	2.08345	0.34915	-2.14612		53	32	102	305	388	2198	663	641	185	1328	736	51
120.45	1.776	2.25249	0.313706	-1.83223		35	40	124	355	342	2377	657	725	43	1240	598	78
120.5	1.7768	2.08557	0.237916	-1.49668		28	66	109	302	374	2373	696	610	233	1163	807	86
120.55	1.7776	2.19967	0.29568	-1.9456		36	37	90	339	348	2336	568	694	181	1169	578	57
120.6	1.7784	2.10167	0.219482	-2.03181		51	38	127	359	361	2371	621	663	236	1294	544	68
120.65	1.7792	2.07797	0.429309	-2.13564		44	35	128	302	455	2366	665	712	246	1276	563	85
120.7	1.78	2.39282	0.292758	-2.26626		60	26	105	283	336	2744	635	654	63	1509	446	82
120.75	1.7808	2.03572	0.23061	-1.92708		31	43	109	305	372	2262	632	538	276	1401	750	120
120.8	1.7816	2.29923	0.327712	-1.9419		48	37	129	358	358	2571	634	518	58	1539	654	60
120.85	1.7824	2.12977	0.250327	-2.55606		36	20	105	368	331	2168	670	568	271	1210	604	57
120.9	1.7832	2.22036	0.140108	-1.82554		44	43	112	296	307	2458	529	532	119	1325	586	106
120.95	1.784	2.26434	0.112733	-2.31275		28	26	123	302	294	2528	635	686	150	1336	798	77
121	1.7848	2.25468	0.17756	-2.71281		62	18	104	345	324	2586	634	570	199	1333	543	91
121.05	1.7856	2.19861	0.00932699	-1.84025		18	42	144	311	267	2384	659	668	235	1410	655	57
121.1	1.7864	2.14432	0.0204637	-1.98166		41	42	134	369	311	2601	647	623	267	1196	560	129
121.15	1.7872	2.15205	0.135783	-2.11843		50	36	119	350	343	2576	653	504	406	1496	569	69
121.2	1.788	2.15653	0.226249	-2.04816		56	36	80	308	350	2412	622	475	391	1434	565	57
121.25	1.7889	2.14522	0.233548	-1.61132		21	55	99	282	348	2354	628	568	345	1204	679	72
121.3	1.7898	2.36725	0.240449	-1.90465		27	35	138	365	299	2508	576	574	137	1402	262	48
121.35	1.7907	2.16477	0.126304	-1.97321		35	37	93	306	302	2319	543	564	191	1377	724	84
121.4	1.7916	2.18137	0.163322	-2.55106		35	21	111	295	317	2385	616	435	265	1442	811	96
121.45	1.7925	2.38911	0.336644	-3.00203		46	11	100	345	310	2414	715	607	96	1195	292	73
121.5	1.7934	2.22847	0.211723	-1.62086		27	52	87	340	325	2442	713	667	91	1400	565	97
121.55	1.7943	2.22579	0.351822	-1.77981		35	42	101	308	354	2306	618	581	221	1384	770	18
121.6	1.7952	2.20698	0.181092	-2.34942		39	25	126	292	314	2381	718	603	169	1497	565	63
121.65	1.7961	2.15563	0.148014	-1.7979		53	42	99	324	294	2189	639	535	59	1305	608	96
121.7	1.797	2.15215	0.280133	-2.11492		21	32	97	303	351	2282	604	600	399	1264	626	67
121.75	1.7979	2.09844	0.0645761	-2.06564		62	36	114	320	303	2316	604	542	156	1545	720	85
121.8	1.7988	2.08444	0.215573	-2.57179		73	21	116	328	341	2210	625	494	232	1414	685	61
121.85	1.7997	2.07864	0.0808659	-2.72409		50	19	128	312	314	2315	597	649	326	1285	770	101
121.9	1.8006	2.17732	0.157548	-2.93699		17	13	110	288	287	2163	561	702	329	1526	722	76
121.95	1.8015	2.10236	0.0224444	-2.12706		33	31	89	291	266	2129	657	687	235	1297	673	69
122	1.8024	2.10504	0.0170195	-2.1463		27	30	99	319	261	2106	657	595	188	1243	682	93
122.05	1.8033	2.05308	0.0226916	-2.24701		83	34	130	322	329	2506	667	507	257	1441	797	126
122.1	1.8042	2.30865	0.0830072	-2.09929		21	30	86	345	266	2463	614	512	275	1446	688	44
122.15	1.8051	2.08819	0.035416	-2.15525		56	34	119	281	304	2368	655	560	281	1204	930	77
122.2	1.806	2.26362	0.137039	-1.68487		39	49	100	292	303	2541	623	604	340	1265	462	36
122.25	1.8069	2.13078	0.157105	-2.31914		65	29	121	338	345	2483	598	498	272	1248	653	99
122.3	1.8078	2.00529	0.201277	-2.03825		44	36	106	337	338	2053	574	655	235	1386	405	102
122.35	1.8087	2.16924	0.0298019	-1.90207		37	41	149	350	283	2404	627	445	180	1174	938	62
122.4	1.8096	2.18394	0.16882	-2.1175		41	31	137	343	305	2288	635	483	131	1074	495	96
122.45	1.8105	2.29975	0.295912	-3.03953		44	11	104	311	309	2292	638	517	128	1148	562	72
122.5	1.8114	2.25651	0.0516836	-2.47214		41	21	129	323	262	2376	618	542	264	1186	616	39
122.55	1.8123	2.21474	0.162033	-2.73485		58	17	131	343	308	2399	657	564	192	1293	398	87
122.6	1.8132	2.19222	0.182944	-1.74959		28	43	96	319	297	2215	652	676	166	1097	728	37
122.65	1.8141	2.12857	0.0266963	-1.88886		35	43	133	358	292	2389	657	521	306	1099	655	74
122.7	1.815	2.16145	0.131469	-2.53323		37	22	97	362	316	2406	618	562	347	1126	723	96
122.75	1.8159	2.21798	0.203073	-3.27509		36	10	105	320	324	2430	734	721	308	1384	592	92
122.8	1.8168	2.23826	0.0410357	-1.68301		53	56	105	327	314	2826	631	560	322	1112	701	70
122.85	1.8177	2.25091	0.183046	-1.31447		58	68	120	353	304	2404	577	491	58	1185	607	48
122.9	1.8186	2.0304	-0.0183493	-2.00426		77	42	126	339	306	2374	633	611	341	1284	668	74
122.95	1.8195	2.11776	0.349246	-2.17398		38	32	70	342	399	2339	621	539	364	1336	733	76
123	1.8204	1.98709	0.306292	-2.07472		38	38	129	335	411	2207	627	755	297	1076	603	114
123.05	1.8213	2.28066	0.181272	-2.70254		41	17	77	326	304	2481	643	547	274	1300	856	50
123.1	1.8222	1.92445	0.0755367	-1.81322		57	54	115	393	357	2268	658	628	412	1250	737	98
123.15	1.8231	2.34589	0.214618	-3.34785		47	8	102	303	282	2376	580	543	258	1231	419	59
123.2	1.824	2.26774	0.25284	-2.12671		16	30	94	319	324	2430	619	534	229	1500	544	92
123.25	1.82505	2.07186	0.0964812	-2.03425		53	38	101	376	320	2307	631	583	261	1273	719	73
123.3	1.8261	2.0534	0.107492	-2.25458		55	31	100	354	329	2303	715	666	304	1323	674	75
123.35	1.82715	2.26353	0.241118	-2.46693		67	23	72	345	345	2607	622	558	254	1508	782	44
123.4	1.8282	2.24686	0.0280504	-2.33062		44	26	116	325	275	2529	655	570	172	1240	736	76
123.45	1.82925	2.25157	0.118988	-1.84111		52	40	81	386	284	2396	614	590	351	1130	176	59
123.5	1.8303	2.18752	0.025086	-2.2987		85	28	132	315	286	2486	652	499	352	1277	718	30
123.55	1.83135	2.05744	-0.0587736	-1.64072		59	59	106	364	287	2382	695	618	271	1310	674	67
123.6	1.8324	2.24026	0.102313	-2.48079		33	21	115	337	278	2358	526	414	211	1343	684	84
123.65	1.83345	2.30187	0.164859	-1.94622		19	35	93	341	289	2449	669	594	359	1126	356	55
123.7	1.8345	2.15358	0.106559	-1.77913		40	44	75	358	290	2246	613	660	227	1160	589	51
123.75	1.83555	2.04835	-0.10187	-1.89733		52	45	111	326	271	2327	612	500	328	1414	847	83
123.8	1.8366	2.19091	0.141053	-2.8971		62	15	120	344	313	2431	679	524	204	1485	608	85
123.85	1.83765	2.03876	0.0649755	-1.79628		60	44	82	361	283	2037	608	556	325	1422	521	33
123.9	1.8387	2.30574	0.249689	-3.0306		47	12	97	309	319	2493	641	609	157	1147	827	71
123.95	1.83975	2.12367	0.162719	-1.80773		29	46	106	316	330	2345	598	547	479	1188	721	51
124	1.8408	2.09581	0.171783	-1.61998		64	55	105	306	330	2260	688	489	292	1264	563	36
[truncated: 4,521 more rows]

## Sheet: Humification
Depth (cm)	Age (cal ka BP)	Humification (average % light transmission)
24.5	0.099	53.8333
30.5	0.139	48.1667
35.5	0.173	40.3667
40.5	0.204	35.1333
45.5	0.235	36.7333
50.5	0.274	34.7667
55.5	0.372	38.6
60.5	0.49	33.2
65.5	0.601	31.7
70.5	0.715	35.0333
75.5	0.831	39.7667
80.5	0.952	35.8333
85.5	1.062	46.7
90.5	1.157	32.9333
95.5	1.251	33.8667
105.5	1.424	40.8333
110.5	1.512	31
115.5	1.601	33.2
120.5	1.689	32.5667
125.5	1.78	32.5
130.5	1.871	34.4333
135.5	1.963	28.7333
140.5	2.047	31.2
145.5	2.131	23.7
150.5	2.212	35.4333
155.5	2.289	29.6667
160.5	2.366	26.1667
165.5	2.445	22.1
170.5	2.525	25.4333
175.5	2.608	25.8333
180.5	2.683	27.0667
185.5	2.757	23.8333
190.5	2.825	30.3
195.5	2.904	30.8
205.5	3.066	30.0333
210.5	3.15	37.3333
215.5	3.234	36.7
220.5	3.315	39.9
225.5	3.395	35.8667
230.5	3.482	32.3333
235.5	3.567	25.5667
240.5	3.654	26.2667
245.5	3.738	29.1333
250.5	3.821	27.2
255.5	3.907	34.9667
260.5	3.99	34.0667
265.5	4.073	30.1
270.5	4.16	37
275.5	4.239	40.2
280.5	4.322	38.4333
285.5	4.402	34.4
295.5	4.557	29.4333
300.5	4.645	36.5333
305.5	4.732	28.3333
310.5	4.824	33.2
315.5	4.916	37.8333
321.5	5.026	37.1
325.5	5.098	33.3667
330.5	5.187	31.7333
335.5	5.277	30
340.5	5.366	33.8667
345.5	5.457	36.2667
350.5	5.545	26.6
355.5	5.632	34.5
360.5	5.723	21.3333
365.5	5.812	29.3333
370.5	5.903	23.7667

## Sheet: Ignition residue
Mid-point depth (cm)	Age (ka BP)	Ignition Residue (%)
15.5	0.036	4.03175
20	0.068	2.43038
23	0.089	3.98114
24.5	0.099	3.98208
25.5	0.105	5.22426
26.5	0.112	5.6836
27.5	0.119	5.64817
28.5	0.126	5.73132
29.5	0.133	5.99164
30.5	0.139	5.924
31.5	0.146	5.87314
32.5	0.152	4.66583
33.5	0.159	5.00511
34.5	0.166	5.80435
35.5	0.173	5.78748
36.5	0.179	5.61741
37.5	0.185	5.67035
38.5	0.191	5.53055
39.5	0.198	6.44189
40.5	0.204	5.52664
41.5	0.21	5.58957
42.5	0.216	5.25119
43.5	0.223	5.5485
44.5	0.229	5.72172
45.5	0.235	5.32063
46.5	0.241	5.46487
47.5	0.247	5.35585
48.5	0.253	4.91773
49.5	0.26	4.74496
51.5	0.293	5.15678
52.5	0.312	5.47703
53.5	0.332	5.80645
54.5	0.353	5.61519
55.5	0.372	5.45827
56.5	0.396	5.4878
57.5	0.421	5.02971
58.5	0.446	5.21519
59.5	0.468	4.82464
60.5	0.49	5.0284
61.5	0.512	5.40802
62.5	0.535	5.01679
63.5	0.556	5.03934
64.5	0.578	5.0374
65.5	0.601	9.50975
66.5	0.625	7.42585
67.5	0.648	5.07777
68.5	0.67	7.14104
69.5	0.693	5.68519
70.5	0.715	5.23594
71.5	0.738	4.79946
72.5	0.763	4.51312
73.5	0.785	3.31901
75.5	0.831	2.90339
76.5	0.854	3.0264
77.5	0.88	2.85637
78.5	0.904	2.6777
79.5	0.93	3.03199
80.5	0.952	3.13991
81.5	0.973	2.53165
82.5	0.997	2.83912
83.5	1.019	2.98171
84.5	1.041	2.85643
85.5	1.062	3.27253
86.5	1.08	3.54855
87.5	1.099	3.6128
88.5	1.12	4.14492
89.5	1.14	3.59948
90.5	1.157	3.26152
92.5	1.197	3.84942
93.5	1.218	3.42873
94.5	1.235	3.49741
95.5	1.251	3.57033
96.5	1.27	3.52829
97.5	1.287	3.40452
98.5	1.304	3.23974
99.5	1.321	3.35092
100.5	1.338	3.5284
101.5	1.355	3.84998
102.5	1.373	3.47967
103.5	1.389	3.45975
104.5	1.406	3.3419
105.5	1.424	3.80783
106.5	1.441	3.36218
107.5	1.459	3.54423
108.5	1.477	3.34513
109.5	1.495	3.24454
110.5	1.512	3.34972
111.5	1.529	3.43533
112.5	1.547	3.11697
113.5	1.565	3.06627
114.5	1.583	3.08292
115.5	1.601	3.02188
116.5	1.618	3.29706
117.5	1.636	3.49776
118.5	1.654	3.18772
119.5	1.672	3.19149
120.5	1.689	3.02259
121.5	1.707	2.93446
122.5	1.724	3.01361
123.5	1.743	3.22581
124.5	1.762	3.07785
125.5	1.78	3.13901
126.5	1.796	3.04217
127.5	1.815	2.83313
128.5	1.835	2.94471
129.5	1.854	3.00464
130.5	1.871	3.01522
131.5	1.888	2.94287
132.5	1.908	2.79346
133.5	1.926	2.75172
134.5	1.945	2.88241
135.5	1.963	2.84951
136.5	1.979	2.67698
137.5	1.995	2.77512
138.5	2.012	2.62997
139.5	2.03	2.56959
140.5	2.047	2.5115
141.5	2.062	2.58026
142.5	2.079	2.65888
143.5	2.096	2.90216
144.5	2.114	2.86136
145.5	2.131	2.95031
146.5	2.145	3.07906
147.5	2.16	2.7668
148.5	2.178	3.03797
149.5	2.195	3.1188
150.5	2.212	2.82822
152.5	2.244	2.68542
153.5	2.26	3.58136
154.5	2.274	2.55149
155.5	2.289	2.42311
156.5	2.306	3.00521
157.5	2.323	2.88586
158.5	2.338	2.89389
159.5	2.352	3.02198
160.5	2.366	3.19767
161.5	2.382	4.1964
162.5	2.398	3.823
163.5	2.415	3.44219
164.5	2.43	3.59066
165.5	2.445	3.01471
166.5	2.461	2.9136
167.5	2.478	2.59987
168.5	2.494	2.48528
169.5	2.509	2.87942
170.5	2.525	3.02198
171.5	2.541	3.27022
172.5	2.558	3.02389
173.5	2.575	3.03464
174.5	2.592	3.10835
175.5	2.608	3.14898
176.5	2.622	3.28051
177.5	2.638	3.18198
178.5	2.653	2.88798
179.5	2.668	3.245
180.5	2.683	2.86032
181.5	2.698	2.69266
182.5	2.713	2.65762
183.5	2.729	2.88862
184.5	2.744	2.55601
185.5	2.757	2.55157
186.5	2.769	2.92235
187.5	2.781	2.92303
188.5	2.796	2.91882
189.5	2.81	2.91424
190.5	2.825	2.77627
192.5	2.858	2.8107
193.5	2.873	2.15276
194.5	2.889	2.34124
195.5	2.904	2.65625
196.5	2.921	2.41866
197.5	2.937	2.25452
198.5	2.953	2.74607
199.5	2.968	3.23887
200.5	2.985	3.06297
202.5	3.019	3.03181
203.5	3.035	2.82566
204.5	3.05	2.74408
205.5	3.066	2.65781
206.5	3.083	2.46877
207.5	3.1	2.52781
208.5	3.116	2.80166
209.5	3.133	2.85633
210.5	3.15	3.02242
211.5	3.168	2.93353
212.5	3.185	3.10378
213.5	3.201	2.93475
214.5	3.217	2.82548
215.5	3.234	2.95775
216.5	3.251	3.77585
217.5	3.266	3.13759
218.5	3.282	2.98982
219.5	3.298	2.86458
220.5	3.315	2.92584
221.5	3.332	2.88722
222.5	3.348	2.85805
223.5	3.365	2.61745
224.5	3.38	2.86248
225.5	3.395	2.81207
226.5	3.413	2.63852
227.5	3.429	2.59781
228.5	3.447	2.70859
229.5	3.465	4.953
230.5	3.482	4.01472
231.5	3.498	2.84734
232.5	3.516	3.05036
233.5	3.533	2.94856
234.5	3.55	2.71669
235.5	3.567	2.75482
236.5	3.583	3.03708
237.5	3.6	3.32894
238.5	3.619	2.48354
239.5	3.636	2.7668
240.5	3.654	2.72926
242.5	3.687	2.90834
243.5	3.704	2.94204
244.5	3.721	2.95215
245.5	3.738	2.78699
246.5	3.756	2.4407
247.5	3.772	2.53587
248.5	3.789	2.63158
249.5	3.805	2.72922
250.5	3.821	2.44224
251.5	3.837	2.94877
252.5	3.855	3.14661
253.5	3.872	2.53949
254.5	3.891	2.29638
255.5	3.907	2.43976
256.5	3.922	2.56164
257.5	3.94	2.53208
258.5	3.956	2.56094
259.5	3.973	2.56911
260.5	3.99	2.65841
261.5	4.004	2.77944
262.5	4.02	2.87474
263.5	4.04	2.81052
265.5	4.073	2.77695
266.5	4.091	2.79407
267.5	4.108	3.15602
268.5	4.127	2.94283
269.5	4.144	2.73067
270.5	4.16	3.06502
271.5	4.175	3.02345
272.5	4.19	2.94718
273.5	4.206	3.01095
274.5	4.222	2.84698
275.5	4.239	2.73894
276.5	4.256	2.84408
277.5	4.273	2.89278
278.5	4.289	2.96255
279.5	4.306	2.71773
280.5	4.322	2.67343
281.5	4.338	2.52818
282.5	4.354	2.51082
283.5	4.371	2.49406
284.5	4.388	2.53052
285.5	4.402	2.61797
286.5	4.415	2.44621
287.5	4.43	2.57168
288.5	4.445	2.60328
289.5	4.462	2.56485
290.5	4.479	2.62073
292.5	4.511	2.60468
293.5	4.526	2.38704
294.5	4.54	2.6
295.5	4.557	2.59905
296.5	4.576	2.38575
297.5	4.594	2.45562
298.5	4.612	2.45855
299.5	4.629	2.32873
300.5	4.645	2.47578
301.5	4.663	2.89855
302.5	4.681	2.27045
303.5	4.698	2.7147
304.5	4.715	2.60569
305.5	4.732	2.76382
306.5	4.749	2.52976
307.5	4.768	2.49664
308.5	4.788	2.57967
309.5	4.806	2.52718
310.5	4.824	2.47473
311.5	4.844	2.18811
312.5	4.863	2.30399
313.5	4.881	2.22087
314.5	4.898	2.4327
315.5	4.916	2.87791
316.5	4.933	2.81736
317.5	4.952	2.56569
318.5	4.971	2.72696
319.5	4.988	2.37042
320.5	5.006	2.52556
321.5	5.026	2.46846
322.5	5.046	2.48807
323.5	5.063	2.89189
324.5	5.081	2.9307
325.5	5.098	2.26023
326.5	5.115	1.94461
327.5	5.133	2.83271
328.5	5.151	2.66352
329.5	5.168	2.36756
330.5	5.187	2.44726
331.5	5.203	2.7583
332.5	5.222	2.84428
333.5	5.241	3.02706
334.5	5.259	2.73048
335.5	5.277	2.57958
336.5	5.295	2.52824
337.5	5.313	2.71725
338.5	5.331	2.82839
339.5	5.349	2.74923
340.5	5.366	2.72458
341.5	5.384	2.61421
342.5	5.403	2.7493
343.5	5.422	2.88818
344.5	5.439	2.903
345.5	5.457	2.93177
346.5	5.473	2.83369
347.5	5.492	2.51256
348.5	5.51	2.87984
349.5	5.529	2.82922
350.5	5.545	2.38234
351.5	5.563	2.63029
352.5	5.58	2.49706
353.5	5.597	2.53196
354.5	5.615	2.11187
355.5	5.632	2.15451
356.5	5.65	1.97967
357.5	5.668	2.10143
358.5	5.686	2.26891
359.5	5.706	2.15609
360.5	5.723	2.25523
361.5	5.741	1.92972
362.5	5.759	2.51389
363.5	5.777	2.43193
364.5	5.795	2.475
365.5	5.812	2.39288
366.5	5.83	2.40445
367.5	5.849	2.39488
368.5	5.868	2.5495
369.5	5.885	2.41217
370.5	5.903	2.53574
371.5	5.921	2.37784
372.5	5.939	2.5818
373.5	5.958	2.42086
374.5	5.976	2.33617
375.5	5.995	2.33045
376.5	6.013	2.29614
377.5	6.032	2.27206
378.5	6.051	2.19976
379.5	6.071	2.24039
380.5	6.087	2.0679
381.5	6.105	2.17239
382.5	6.123	2.16492
383.5	6.144	2.16906
384.5	6.162	2.2035
385.5	6.179	2.13971
386.5	6.195	2.09163
387.5	6.211	2.00318
388.5	6.228	2.06447
389.5	6.246	2.05366
390.5	6.262	2.34299
391.5	6.275	2.08398
392.5	6.289	2.09834
393.5	6.305	2.07455
394.5	6.322	2.21519
395.5	6.341	2.0192
397.5	6.38	2.08333
398.5	6.396	2.45268
399.5	6.411	2.5204

## Sheet: Windiness Index
Historical Windiness Index for Ireland, 431-1649 CE
Years	Windiness Index
431	0
432	0
433	0
434	0
435	0
436	0
437	0
438	0
439	0
440	0
441	0
442	0
443	0
444	0
445	0
446	0
447	0
448	0
449	0
450	0
451	0
452	0
453	0
454	0
455	0
456	0
457	0
458	0
459	0
460	0
461	0
462	0
463	0
464	0
465	0
466	0
467	0
468	0
469	0
470	0
471	0
472	0
473	0
474	0
475	0
476	0
477	0
478	0
479	0
480	0
481	0
482	0
483	0
484	0
485	0
486	0
487	0
488	0
489	0
490	0
491	0
492	0
493	0
494	0
495	0
496	0
497	0
498	0
499	0
500	0
501	0
502	0
503	0
504	0
505	0
506	0
507	0
508	0
509	0
510	0
511	0
512	0
513	0
514	0
515	0
516	0
517	0
518	0
519	0
520	0
521	0
522	0
523	0
524	0
525	0
526	0
527	0
528	0
529	0
530	0
531	0
532	0
533	0
534	0
535	0
536	0
537	0
538	0
539	0
540	0
541	0
542	0
543	0
544	0
545	0
546	0
547	0
548	0
549	0
550	0
551	0
552	0
553	0
554	0
555	0
556	0
557	0
558	0
559	0
560	0
561	0
562	0
563	1
564	0
565	0
566	0
567	0
568	0
569	0
570	0
571	0
572	0
573	0
574	0
575	0
576	0
577	0
578	0
579	0
580	0
581	0
582	0
583	0
584	0
585	0
586	0
587	0
588	0
589	0
590	0
591	0
592	0
593	0
594	0
595	0
596	0
597	0
598	0
599	0
600	0
601	0
602	0
603	0
604	0
605	0
606	0
607	0
608	0
609	0
610	0
611	0
612	0
613	0
614	0
615	0
616	0
617	0
618	0
619	0
620	0
621	0
622	0
623	0
624	0
625	0
626	0
627	0
628	0
629	0
630	0
631	0
632	0
633	0
634	0
635	0
636	0
637	0
638	0
639	0
640	0
641	0
642	0
643	0
644	0
645	0
646	0
647	0
648	0
649	0
650	0
651	0
652	0
653	0
654	0
655	0
656	0
657	1
658	0
659	0
660	0
661	0
662	0
663	0
664	0
665	0
666	0
667	0
668	0
669	0
670	0
671	0
672	0
673	0
674	0
675	0
676	0
677	0
678	0
679	0
680	0
681	0
682	0
683	0
684	0
685	1
686	0
687	0
688	0
689	0
690	0
691	1
692	0
693	0
694	0
695	0
696	0
697	0
698	0
699	0
700	0
701	0
702	0
703	0
704	0
705	0
706	0
707	0
708	0
709	0
710	0
711	0
712	0
713	0
714	0
715	0
716	0
717	0
718	0
719	0
720	1
721	0
722	0
723	0
724	0
725	0
726	0
727	0
728	0
729	0
730	0
731	0
732	0
733	0
734	0
735	0
736	0
737	0
738	0
739	0
740	0
741	0
742	0
743	0
744	0
745	0
746	0
747	0
748	0
749	1
750	0
751	0
752	0
753	0
754	0
755	0
756	0
757	0
758	0
759	0
760	0
761	0
762	0
763	0
764	0
765	0
766	0
767	0
768	0
769	0
770	0
771	0
772	0
773	0
774	0
775	0
776	0
777	1
778	0
779	1
780	0
781	0
782	0
783	1
784	0
785	0
786	1
787	0
788	0
789	0
790	0
791	0
792	0
793	0
794	0
795	0
796	0
797	0
798	0
799	0
800	0
801	0
802	0
803	0
804	1
805	0
806	0
807	0
808	0
809	0
810	0
811	0
812	0
813	0
814	0
815	0
816	1
817	0
818	0
819	0
820	0
821	0
822	0
823	0
824	0
825	0
826	0
827	0
828	0
829	0
830	0
831	0
832	0
833	0
834	0
835	0
836	0
837	0
838	0
839	0
840	0
841	0
842	0
843	0
844	0
845	0
846	0
847	0
848	0
849	0
850	0
851	0
852	0
853	0
854	0
855	0
856	1
857	1
858	0
859	0
860	0
861	0
862	0
863	0
864	0
865	0
866	0
867	0
868	1
869	0
870	0
871	0
872	0
873	0
874	0
875	0
876	0
877	0
878	1
879	0
880	0
881	0
882	0
883	0
884	0
885	0
886	0
887	0
888	0
889	0
890	0
891	0
892	1
893	0
894	0
895	0
896	0
897	0
898	0
899	0
900	0
901	0
902	0
903	0
904	0
905	0
906	0
907	0
908	0
909	0
910	0
911	0
912	0
913	0
914	0
915	0
916	0
917	0
918	0
919	0
920	0
921	0
922	0
923	0
924	0
925	0
926	0
927	0
928	0
929	0
930	0
931	0
932	0
933	0
934	0
935	0
936	0
937	1
938	0
939	0
940	0
941	0
942	0
943	0
944	0
945	0
946	0
947	0
948	0
949	0
950	0
951	0
952	0
953	0
954	0
955	0
956	0
957	0
958	0
959	0
960	0
961	0
962	0
963	0
964	0
965	0
966	0
967	0
968	0
969	0
970	0
971	0
972	0
973	0
974	0
975	1
976	0
977	0
978	0
979	0
980	0
981	0
982	0
983	0
984	0
985	0
986	0
987	1
988	0
989	0
990	0
991	1
992	0
993	0
994	0
995	0
996	0
997	0
998	0
999	0
1000	0
1001	0
1002	0
1003	0
1004	0
1005	0
1006	0
1007	0
1008	0
1009	0
1010	0
1011	0
1012	0
1013	0
1014	0
1015	1
1016	1
1017	0
1018	0
1019	0
1020	0
1021	0
1022	0
1023	0
1024	0
1025	0
1026	0
1027	0
1028	0
1029	0
1030	0
1031	0
1032	0
1033	0
1034	0
1035	0
1036	0
1037	1
1038	0
1039	0
1040	0
1041	0
1042	0
1043	0
1044	0
1045	0
1046	0
1047	0
1048	0
1049	0
1050	1
1051	0
1052	1
1053	0
1054	0
1055	0
1056	0
1057	0
1058	0
1059	0
1060	0
1061	0
1062	0
1063	0
1064	0
1065	0
1066	0
1067	0
1068	0
1069	0
1070	0
1071	0
1072	0
1073	0
1074	0
1075	0
1076	0
1077	1
1078	0
1079	0
1080	0
1081	0
1082	0
1083	0
1084	0
1085	0
1086	0
1087	1
1088	0
1089	1
1090	0
1091	0
1092	0
1093	1
1094	1
1095	0
1096	0
1097	0
1098	0
1099	0
1100	0
1101	0
1102	0
1103	0
1104	0
1105	0
1106	0
1107	1
1108	1
1109	1
1110	0
1111	1
1112	0
1113	0
1114	0
1115	0
1116	0
1117	0
1118	0
1119	0
1120	0
1121	1
1122	0
1123	0
1124	0
1125	0
1126	0
1127	0
1128	0
1129	0
1130	0
1131	0
1132	0
1133	0
1134	0
1135	0
1136	0
1137	1
1138	0
1139	0
1140	0
1141	0
1142	0
1143	0
1144	0
1145	0
1146	1
1147	0
1148	0
1149	0
1150	0
1151	1
1152	0
1153	0
1154	0
1155	0
1156	0
1157	0
1158	0
1159	0
1160	0
1161	0
1162	0
1163	0
1164	0
1165	0
1166	0
1167	0
1168	0
1169	0
1170	0
1171	0
1172	1
1173	0
1174	0
1175	0
1176	0
1177	0
1178	1
1179	0
1180	0
1181	0
1182	0
1183	0
1184	0
1185	0
1186	0
1187	0
1188	0
1189	1
1190	1
1191	1
1192	0
1193	0
1194	0
1195	0
1196	0
1197	0
1198	0
1199	0
1200	0
1201	0
1202	0
1203	1
1204	0
1205	0
1206	0
1207	0
1208	0
1209	0
1210	0
1211	0
1212	0
1213	0
1214	0
1215	1
1216	0
1217	0
1218	0
1219	1
1220	0
1221	0
1222	1
1223	1
1224	1
1225	0
1226	0
1227	0
1228	0
1229	0
1230	0
1231	0
1232	0
1233	0
1234	0
1235	0
1236	1
1237	0
1238	0
1239	0
1240	0
1241	0
1242	0
1243	0
1244	0
1245	0
1246	0
1247	0
1248	0
1249	0
1250	0
1251	0
1252	1
1253	0
1254	0
1255	0
1256	0
1257	0
1258	0
1259	0
1260	0
1261	0
1262	0
1263	0
1264	0
1265	0
1266	0
1267	0
1268	1
1269	0
1270	0
1271	1
1272	0
1273	0
1274	0
1275	0
1276	0
1277	0
1278	0
1279	0
1280	0
1281	1
1282	1
1283	0
1284	1
1285	1
1286	0
1287	0
1288	0
1289	0
1290	0
1291	0
1292	0
1293	0
1294	0
1295	0
1296	1
1297	1
1298	0
1299	0
1300	0
1301	0
1302	0
1303	0
1304	0
1305	1
1306	0
1307	0
1308	1
1309	0
1310	1
1311	0
1312	0
1313	0
1314	0
1315	1
1316	0
1317	0
1318	0
1319	0
1320	0
1321	0
1322	0
1323	0
1324	0
1325	0
1326	0
1327	0
1328	1
1329	0
1330	0
1331	0
1332	0
1333	0
1334	0
1335	0
1336	0
1337	0
1338	0
1339	0
1340	0
1341	0
1342	0
1343	0
1344	0
1345	0
1346	0
1347	0
1348	0
1349	0
1350	0
1351	0
1352	0
1353	0
1354	0
1355	0
1356	0
1357	0
1358	0
1359	0
1360	0
1361	0
1362	0
1363	1
1364	0
1365	0
1366	0
1367	0
1368	0
1369	0
1370	0
1371	0
1372	0
1373	1
1374	0
1375	0
1376	0
1377	0
1378	0
1379	0
1380	0
1381	0
1382	0
1383	0
1384	0
1385	0
1386	0
1387	0
1388	0
1389	0
1390	0
1391	0
1392	0
1393	0
1394	0
1395	0
1396	0
1397	1
1398	0
1399	0
1400	0
1401	0
1402	0
1403	0
1404	0
1405	1
1406	0
1407	1
1408	0
1409	0
1410	0
1411	0
1412	0
1413	1
1414	0
1415	0
1416	0
1417	0
1418	0
1419	0
1420	0
1421	0
1422	0
1423	0
1424	1
1425	1
1426	0
1427	0
1428	0
1429	0
1430	0
1431	0
1432	0
1433	0
1434	0
1435	0
1436	0
1437	0
1438	0
1439	0
1440	0
1441	0
1442	0
1443	1
1444	0
1445	0
1446	1
1447	0
1448	0
1449	0
1450	1
1451	0
1452	0
1453	0
1454	0
1455	0
1456	0
1457	0
1458	0
1459	0
1460	0
1461	0
1462	1
1463	0
1464	0
1465	1
1466	0
1467	0
1468	0
1469	0
1470	0
1471	0
1472	0
1473	0
1474	0
1475	0
1476	0
1477	1
1478	1
1479	0
1480	0
1481	0
1482	0
1483	0
1484	0
1485	0
1486	0
1487	1
1488	0
1489	0
1490	0
1491	1
1492	0
1493	0
1494	0
1495	0
1496	1
1497	0
1498	0
1499	0
1500	1
1501	0
1502	1
1503	0
1504	0
1505	0
1506	0
1507	0
1508	0
1509	0
1510	0
1511	0
1512	0
1513	0
1514	0
1515	0
1516	0
1517	1
1518	0
1519	1
1520	0
1521	0
1522	0
1523	1
1524	1
1525	0
1526	0
1527	0
1528	0
1529	1
1530	0
1531	0
1532	0
1533	0
1534	0
1535	0
1536	0
1537	0
1538	0
1539	0
1540	0
1541	1
1542	0
1543	0
1544	0
1545	0
1546	0
1547	1
1548	0
1549	0
1550	0
1551	0
1552	0
1553	0
1554	0
1555	0
1556	0
1557	0
1558	0
1559	0
1560	1
1561	0
1562	0
1563	0
1564	0
1565	0
1566	0
1567	0
1568	1
1569	0
1570	0
1571	0
1572	0
1573	0
1574	0
1575	0
1576	0
1577	0
1578	0
1579	0
1580	0
1581	1
1582	1
1583	0
1584	0
1585	0
1586	0
1587	0
1588	1
1589	0
1590	0
1591	0
1592	0
1593	0
1594	0
1595	0
1596	0
1597	0
1598	0
1599	0
1600	0
1601	1
1602	1
1603	0
1604	0
1605	0
1606	0
1607	0
1608	0
1609	0
1610	0
1611	0
1612	0
1613	0
1614	0
1615	0
1616	0
1617	0
1618	0
1619	0
1620	0
1621	0
1622	0
1623	0
1624	0
1625	0
1626	0
1627	0
1628	0
1629	0
1630	0
1631	0
1632	0
1633	0
1634	0
1635	0
1636	0
1637	0
1638	0
1639	0
1640	0
1641	0
1642	0
1643	0
1644	0
1645	0
1646	0
1647	0
1648	0
1649	0
